# Supplementary material
Source: publisher figshare collection journal article supplement (https://gsajournals.figshare.com/ndownloader/files/20187282)
Supplement: Supplementary file 1 [file 20187282]

## Sheet: Overview
	Total	Up-regulated	Down-regulated
cbp80	2672 (53)	2105 (52)	567 (1)
Note: the numbers of differentially expressed miRNA coding genes are shown in parenthesises.

## Sheet: cbp80
Gene ID	logFC	logCPM	PValue	FDR	Direction of change	description	comp_description	IPR_domain	has SNP/indels?	SNPs/indels
AT1G01080	-0.995301	5.97951	5.53933e-05	0.00153809	DOWN	RNA-binding (RRM/RBD/RNP motifs) family protein	RNA-binding (RRM/RBD/RNP motifs) family protein; FUNCTIONS IN: RNA binding, nucleotide binding, nucleic acid binding; INVOLVED IN: biological_process unknown; LOCATED IN: chloroplast; LOCATED IN: chloroplast stroma, nucleus, chloroplast, chloroplast envelope; EXPRESSED IN: 23 plant structures; EXPRESSED DURING: 13 growth stages; CONTAINS InterPro DOMAIN/s: RNA recognition motif, RNP-1 (InterPro:I…	Nucleotide-binding, alpha-beta plait | RNA recognition motif domain	NO
AT1G01120	1.36344	4.67119	6.87188e-05	0.00182245	UP	3-ketoacyl-CoA synthase 1	3-ketoacyl-CoA synthase 1 (KCS1); FUNCTIONS IN: fatty acid elongase activity, acyltransferase activity; INVOLVED IN: in 7 processes; LOCATED IN: cytosolic ribosome, endoplasmic reticulum, membrane; EXPRESSED IN: 29 plant structures; EXPRESSED DURING: 13 growth stages; CONTAINS InterPro DOMAIN/s: Thiolase-like (InterPro:IPR016039), Very-long-chain 3-ketoacyl-CoA synthase (InterPro:IPR012392), 3-Ox…	3-Oxoacyl-[acyl-carrier-protein (ACP)] synthase III C-terminal | FAE1/Type III polyketide synthase-like protein | Thiolase-like | Thiolase-like, subgroup | Very-long-chain 3-ketoacyl-CoA synthase	NO
AT1G01190	-2.07851	1.98717	2.50476e-07	1.51188e-05	DOWN	cytochrome P450, family 78, subfamily A, polypeptide 8	cytochrome P450, family 78, subfamily A, polypeptide 8 (CYP78A8); FUNCTIONS IN: electron carrier activity, monooxygenase activity, iron ion binding, oxygen binding, heme binding; INVOLVED IN: oxidation reduction; LOCATED IN: endomembrane system; EXPRESSED IN: 6 plant structures; EXPRESSED DURING: LP.10 ten leaves visible, LP.02 two leaves visible, LP.12 twelve leaves visible; CONTAINS InterPro DO…	Cytochrome P450 | Cytochrome P450, E-class, group I | Cytochrome P450, conserved site	NO
AT1G01200	1.7176	0.546179	0.00116091	0.0185839	UP	RAB GTPase homolog A3	RAB GTPase homolog A3 (RABA3); FUNCTIONS IN: GTP binding; INVOLVED IN: protein transport, small GTPase mediated signal transduction; LOCATED IN: endosome, nucleus, cell plate; EXPRESSED IN: lateral root cap, hypocotyl, root, flower, epidermis; EXPRESSED DURING: petal differentiation and expansion stage; CONTAINS InterPro DOMAIN/s: Ras GTPase (InterPro:IPR001806), Small GTP-binding protein (InterP…	P-loop containing nucleoside triphosphate hydrolase | Small GTP-binding protein domain | Small GTPase superfamily | Small GTPase superfamily, Rab type	NO
AT1G01220	0.857387	5.58065	0.000897228	0.0151173	UP	L-fucokinase/GDP-L-fucose pyrophosphorylase	L-fucokinase/GDP-L-fucose pyrophosphorylase (FKGP); FUNCTIONS IN: fucose-1-phosphate guanylyltransferase activity, fucokinase activity, ATP binding, galactokinase activity; INVOLVED IN: GDP-L-fucose salvage; LOCATED IN: cytoplasm; EXPRESSED IN: 22 plant structures; EXPRESSED DURING: 13 growth stages; CONTAINS InterPro DOMAIN/s: Mevalonate/galactokinase (InterPro:IPR006206), Ribosomal protein S5 d…	GHMP kinase N-terminal domain | GHMP kinase, C-terminal domain | L-fucokinase | Mevalonate/galactokinase | Ribosomal protein S5 domain 2-type fold | Ribosomal protein S5 domain 2-type fold, subgroup	NO
AT1G01250	1.08148	2.63208	0.000818022	0.0139731	UP	Integrase-type DNA-binding superfamily protein	Integrase-type DNA-binding superfamily protein; FUNCTIONS IN: DNA binding, sequence-specific DNA binding transcription factor activity; INVOLVED IN: regulation of transcription, DNA-dependent; LOCATED IN: nucleus, chloroplast; EXPRESSED IN: 10 plant structures; EXPRESSED DURING: 6 growth stages; CONTAINS InterPro DOMAIN/s: DNA-binding, integrase-type (InterPro:IPR016177), Pathogenesis-related tra…	AP2/ERF domain | DNA-binding domain	NO
AT1G01320	1.82675	10.1613	3.09613e-11	4.74004e-09	UP	Tetratricopeptide repeat (TPR)-like superfamily protein	Tetratricopeptide repeat (TPR)-like superfamily protein; FUNCTIONS IN: binding; LOCATED IN: cellular_component unknown; EXPRESSED IN: 24 plant structures; EXPRESSED DURING: 14 growth stages; CONTAINS InterPro DOMAIN/s: Tetratricopeptide-like helical (InterPro:IPR011990), Tetratricopeptide repeat-containing (InterPro:IPR013026), Tetratricopeptide repeat (InterPro:IPR019734); BEST Arabidopsis thali…	Clustered mitochondria protein, N-terminal | GSKIP domain | Tetratricopeptide repeat | Tetratricopeptide repeat-containing domain | Tetratricopeptide-like helical domain	NO
AT1G01490	2.06388	7.25071	1.60446e-14	4.91271e-12	UP	Heavy metal transport/detoxification superfamily protein	Heavy metal transport/detoxification superfamily protein ; FUNCTIONS IN: metal ion binding; INVOLVED IN: metal ion transport; LOCATED IN: cellular_component unknown; EXPRESSED IN: 22 plant structures; EXPRESSED DURING: 14 growth stages; CONTAINS InterPro DOMAIN/s: Heavy metal transport/detoxification protein (InterPro:IPR006121); BEST Arabidopsis thaliana protein match is: Heavy metal transport/d…	Heavy metal-associated domain, HMA	NO
AT1G01650	0.881468	6.14475	0.000422738	0.00816413	UP	SIGNAL PEPTIDE PEPTIDASE-LIKE 4	SIGNAL PEPTIDE PEPTIDASE-LIKE 4 (SPPL4); FUNCTIONS IN: peptidase activity, aspartic-type endopeptidase activity; INVOLVED IN: proteolysis; LOCATED IN: endomembrane system, integral to membrane; LOCATED IN: integral to membrane; EXPRESSED IN: 24 plant structures; EXPRESSED DURING: 13 growth stages; CONTAINS InterPro DOMAIN/s: Peptidase A22, presenilin signal peptide (InterPro:IPR006639), Peptidase…	Peptidase A22B, signal peptide peptidase | Presenilin/signal peptide peptidase | Protease-associated domain, PA	YES	1:235412:G-A;intronic_variant
AT1G01750	1.77093	2.55488	0.000391638	0.00772293	UP	actin depolymerizing factor 11	actin depolymerizing factor 11 (ADF11); FUNCTIONS IN: actin binding; INVOLVED IN: biological_process unknown; LOCATED IN: intracellular; EXPRESSED IN: 6 plant structures; EXPRESSED DURING: 4 anthesis, petal differentiation and expansion stage; CONTAINS InterPro DOMAIN/s: Actin-binding, cofilin/tropomyosin type (InterPro:IPR002108); BEST Arabidopsis thaliana protein match is: actin depolymerizing …	ADF-H/Gelsolin-like domain | ADF/Cofilin/Destrin | Actin-depolymerising factor homology domain	NO
AT1G02335	-1.74532	2.31996	3.94781e-07	2.25366e-05	DOWN	germin-like protein subfamily 2 member 2 precursor	germin-like protein subfamily 2 member 2 precursor (GL22); FUNCTIONS IN: manganese ion binding, nutrient reservoir activity; LOCATED IN: endomembrane system, apoplast; CONTAINS InterPro DOMAIN/s: Cupin, RmlC-type (InterPro:IPR011051), Cupin 1 (InterPro:IPR006045), RmlC-like jelly roll fold (InterPro:IPR014710), Germin (InterPro:IPR001929), Germin, manganese binding site (InterPro:IPR019780); BEST…	Cupin 1 | Germin | Germin, manganese binding site | RmlC-like cupin domain | RmlC-like jelly roll fold	NO
AT1G02360	1.03199	2.91892	0.000831033	0.014165	UP	Chitinase family protein	Chitinase family protein; FUNCTIONS IN: chitinase activity; INVOLVED IN: carbohydrate metabolic process, cell wall macromolecule catabolic process; LOCATED IN: endomembrane system; EXPRESSED IN: stem, cotyledon, leaf whorl, root; CONTAINS InterPro DOMAIN/s: Glycoside hydrolase, family 19 (InterPro:IPR016283), Glycoside hydrolase, family 19, catalytic (InterPro:IPR000726); BEST Arabidopsis thalian…		NO
AT1G02410	0.812058	4.73339	0.000446685	0.00855791	UP	cytochrome c oxidase assembly protein CtaG / Cox11 family	cytochrome c oxidase assembly protein CtaG / Cox11 family; FUNCTIONS IN: copper ion binding; INVOLVED IN: biological_process unknown; EXPRESSED IN: 24 plant structures; EXPRESSED DURING: 15 growth stages; CONTAINS InterPro DOMAIN/s: Cytochrome c oxidase assembly protein CtaG/Cox11 (InterPro:IPR007533)	Cytochrome c oxidase assembly protein CtaG/Cox11 | Cytochrome c oxidase assembly protein CtaG/Cox11, domain	YES	1:491118:A-AT;intronic_variant,1:491118:A-AT;exonic_variant,1:491118:A-AT;splice_donor_region_variant
AT1G02570	2.5157	0.656533	2.94828e-05	0.00090694	UP		unknown protein; BEST Arabidopsis thaliana protein match is: unknown protein (TAIR:AT1G02575.1)		NO
AT1G02575	3.0137	-2.28098	0.00262899	0.0362379	UP		unknown protein; BEST Arabidopsis thaliana protein match is: unknown protein (TAIR:AT1G02570.1)		NO
AT1G02580	2.34833	-1.18973	0.0012414	0.0195964	UP	SET domain-containing protein	MEDEA (MEA); CONTAINS InterPro DOMAIN/s: SANT, DNA-binding (InterPro:IPR001005), SET domain (InterPro:IPR001214); BEST Arabidopsis thaliana protein match is: SET domain-containing protein (TAIR:AT4G02020.1)	CXC domain | Histone-lysine N-methyltransferase, EZ | SANT/Myb domain | SET domain	NO
AT1G02810	1.58814	3.53814	1.93443e-06	8.93739e-05	UP	Plant invertase/pectin methylesterase inhibitor superfamily	Plant invertase/pectin methylesterase inhibitor superfamily; FUNCTIONS IN: enzyme inhibitor activity, pectinesterase activity; INVOLVED IN: cell wall modification; LOCATED IN: endomembrane system, cell wall, plant-type cell wall; EXPRESSED IN: 14 plant structures; EXPRESSED DURING: 6 growth stages; CONTAINS InterPro DOMAIN/s: Pectinesterase, active site (InterPro:IPR018040), Pectin lyase fold/vir…	Pectin lyase fold | Pectin lyase fold/virulence factor | Pectinesterase inhibitor domain | Pectinesterase, active site | Pectinesterase, catalytic	NO
AT1G02840	-1.39892	6.9141	8.72106e-09	7.51237e-07	DOWN	RNA-binding (RRM/RBD/RNP motifs) family protein	SR1; FUNCTIONS IN: RNA binding, nucleotide binding, nucleic acid binding; LOCATED IN: interchromatin granule, nuclear speck, nucleus; EXPRESSED IN: 25 plant structures; EXPRESSED DURING: 15 growth stages; CONTAINS InterPro DOMAIN/s: RNA recognition motif, RNP-1 (InterPro:IPR000504), Nucleotide-binding, alpha-beta plait (InterPro:IPR012677); BEST Arabidopsis thaliana protein match is: RNA-binding …	Nucleotide-binding, alpha-beta plait | RNA recognition motif domain	YES	1:627736:C-T;protein_coding;stop-gain;CAA>TAA;Q>*
AT1G02850	-0.967219	5.86059	5.42391e-05	0.00150977	DOWN	beta glucosidase 11	beta glucosidase 11 (BGLU11); FUNCTIONS IN: cation binding, hydrolase activity, hydrolyzing O-glycosyl compounds, catalytic activity; INVOLVED IN: carbohydrate metabolic process; LOCATED IN: endomembrane system; EXPRESSED IN: 24 plant structures; EXPRESSED DURING: 13 growth stages; CONTAINS InterPro DOMAIN/s: Glycoside hydrolase, family 1 (InterPro:IPR001360), Glycoside hydrolase, family 1, activ…	Glycoside hydrolase, catalytic domain | Glycoside hydrolase, family 1 | Glycoside hydrolase, family 1, active site | Glycoside hydrolase, superfamily	NO
AT1G02900	1.48868	3.74873	7.95477e-07	4.16032e-05	UP	rapid alkalinization factor 1	rapid alkalinization factor 1 (RALF1); CONTAINS InterPro DOMAIN/s: Rapid ALkalinization Factor (InterPro:IPR008801); BEST Arabidopsis thaliana protein match is: ralf-like 33 (TAIR:AT4G15800.1)	Rapid ALkalinization Factor	NO
AT1G03180	1.42123	2.47652	3.8684e-05	0.0011403	UP		unknown protein; FUNCTIONS IN: molecular_function unknown; INVOLVED IN: biological_process unknown; LOCATED IN: mitochondrion; EXPRESSED IN: 15 plant structures; EXPRESSED DURING: 8 growth stages		NO
AT1G03290	1.22291	6.06014	5.04413e-08	3.61471e-06	UP		unknown protein; FUNCTIONS IN: molecular_function unknown; INVOLVED IN: biological_process unknown; LOCATED IN: cellular_component unknown; EXPRESSED IN: 22 plant structures; EXPRESSED DURING: 13 growth stages; BEST Arabidopsis thaliana protein match is: unknown protein (TAIR:AT4G02880.2)		NO
AT1G03410	-2.83244	3.5598	2.57981e-16	1.08613e-13	DOWN	2-oxoglutarate (2OG) and Fe(II)-dependent oxygenase superfamily protein	2A6; FUNCTIONS IN: oxidoreductase activity; LOCATED IN: endomembrane system; EXPRESSED IN: 17 plant structures; EXPRESSED DURING: 10 growth stages; CONTAINS InterPro DOMAIN/s: Oxoglutarate/iron-dependent oxygenase (InterPro:IPR005123); BEST Arabidopsis thaliana protein match is: 2-oxoglutarate (2OG) and Fe(II)-dependent oxygenase superfamily protein (TAIR:AT1G03400.1)	Isopenicillin N synthase-like | Non-haem dioxygenase N-terminal domain | Oxoglutarate/iron-dependent dioxygenase	NO
AT1G03420	1.48724	4.54471	1.60398e-09	1.66226e-07	UP	transposable element gene			NO
AT1G03430	0.857054	5.24269	0.000119866	0.002901	UP	histidine-containing phosphotransfer factor 5	histidine-containing phosphotransfer factor 5 (AHP5); CONTAINS InterPro DOMAIN/s: Signal transduction histidine kinase, phosphotransfer (Hpt) domain (InterPro:IPR008207); BEST Arabidopsis thaliana protein match is: histidine-containing phosphotransmitter 2 (TAIR:AT3G29350.1)	Signal transduction histidine kinase, phosphotransfer (Hpt) domain	NO
AT1G03580	-1.48215	2.3885	0.000802634	0.0137645	DOWN		pseudogene, meprin and TRAF homology (MATH) domain protein -related, weak similarity to ubiquitin-specific protease 12 (Arabidopsis thaliana) GI:11993471; contains weak hit to Pfam PF00917: MATH domain		NO
AT1G03590	0.984681	5.54996	2.8991e-05	0.000896644	UP	Protein phosphatase 2C family protein	Protein phosphatase 2C family protein; FUNCTIONS IN: protein serine/threonine phosphatase activity, catalytic activity; INVOLVED IN: N-terminal protein myristoylation; LOCATED IN: plasma membrane; EXPRESSED IN: 23 plant structures; EXPRESSED DURING: 13 growth stages; CONTAINS InterPro DOMAIN/s: Protein phosphatase 2C-related (InterPro:IPR001932), Protein phosphatase 2C (InterPro:IPR015655), Prote…	Protein phosphatase 2C | Protein phosphatase 2C (PP2C)-like domain	YES	1:895475:G-GA;splice_acceptor_region_variant
AT1G03620	1.24482	2.70137	0.000135228	0.00320732	UP	ELMO/CED-12 family protein	ELMO/CED-12 family protein; FUNCTIONS IN: molecular_function unknown; INVOLVED IN: phagocytosis; LOCATED IN: cytoskeleton; EXPRESSED IN: 16 plant structures; EXPRESSED DURING: 6 growth stages; CONTAINS InterPro DOMAIN/s: Engulfment/cell motility, ELMO (InterPro:IPR006816); BEST Arabidopsis thaliana protein match is: ELMO/CED-12 family protein (TAIR:AT3G03610.1)	Engulfment/cell motility, ELMO	YES	1:904216:TG-T;exonic_variant
AT1G03700	1.52628	-0.0293786	0.00332136	0.0436468	UP	Uncharacterised protein family (UPF0497)	Uncharacterised protein family (UPF0497); FUNCTIONS IN: molecular_function unknown; INVOLVED IN: biological_process unknown; LOCATED IN: endomembrane system; EXPRESSED IN: hypocotyl, flower; EXPRESSED DURING: petal differentiation and expansion stage; CONTAINS InterPro DOMAIN/s: Uncharacterised protein family UPF0497, trans-membrane plant (InterPro:IPR006702), Uncharacterised protein family UPF04…	Uncharacterised protein family UPF0497, trans-membrane plant | Uncharacterised protein family UPF0497, trans-membrane plant subgroup	NO
AT1G03710	2.2636	-1.30654	0.000666642	0.0118612	UP	Cystatin/monellin superfamily protein	Cystatin/monellin superfamily protein; FUNCTIONS IN: cysteine-type endopeptidase inhibitor activity; INVOLVED IN: biological_process unknown; LOCATED IN: cellular_component unknown; EXPRESSED IN: 10 plant structures; EXPRESSED DURING: 8 growth stages; CONTAINS InterPro DOMAIN/s: Proteinase inhibitor I25, cystatin (InterPro:IPR000010), Proteinase inhibitor I25, cystatin, conserved region (InterPro…	Cystatin-related, plant | Proteinase inhibitor I25, cystatin | Proteinase inhibitor I25, cystatin, conserved region	NO
AT1G03820	1.03166	3.258	0.00359369	0.0463961	UP		unknown protein; FUNCTIONS IN: molecular_function unknown; INVOLVED IN: biological_process unknown; LOCATED IN: endomembrane system; EXPRESSED IN: 21 plant structures; EXPRESSED DURING: 13 growth stages		NO
AT1G03840	1.44159	0.928344	0.000321259	0.00656972	UP	C2H2 and C2HC zinc fingers superfamily protein	Magpie (MGP); CONTAINS InterPro DOMAIN/s: Zinc finger, C2H2-like (InterPro:IPR015880), Zinc finger, C2H2-type (InterPro:IPR007087); CONTAINS InterPro DOMAIN/s: Zinc finger, C2H2-type (InterPro:IPR007087); BEST Arabidopsis thaliana protein match is: C2H2-like zinc finger protein (TAIR:AT5G44160.1)	Zinc finger C2H2-type/integrase DNA-binding domain | Zinc finger, C2H2 | Zinc finger, C2H2-like	NO
AT1G03870	0.951889	4.93879	4.0313e-05	0.00117761	UP	FASCICLIN-like arabinoogalactan 9	FASCICLIN-like arabinoogalactan 9 (FLA9); LOCATED IN: anchored to plasma membrane, plasma membrane, anchored to membrane; EXPRESSED IN: 23 plant structures; EXPRESSED DURING: 14 growth stages; CONTAINS InterPro DOMAIN/s: FAS1 domain (InterPro:IPR000782); BEST Arabidopsis thaliana protein match is: FASCICLIN-like arabinogalactan protein 13 precursor (TAIR:AT5G44130.1)	FAS1 domain	NO
AT1G03940	2.67709	0.177857	2.67023e-05	0.000837394	UP	HXXXD-type acyl-transferase family protein	HXXXD-type acyl-transferase family protein; FUNCTIONS IN: transferase activity, transferring acyl groups other than amino-acyl groups, transferase activity; INVOLVED IN: biological_process unknown; LOCATED IN: cellular_component unknown; CONTAINS InterPro DOMAIN/s: Transferase (InterPro:IPR003480); BEST Arabidopsis thaliana protein match is: HXXXD-type acyl-transferase family protein (TAIR:AT1G03…	Chloramphenicol acetyltransferase-like domain | Transferase	NO
AT1G04040	1.35196	5.73532	6.98528e-08	4.84097e-06	UP	HAD superfamily, subfamily IIIB acid phosphatase	HAD superfamily, subfamily IIIB acid phosphatase ; FUNCTIONS IN: acid phosphatase activity; INVOLVED IN: biological_process unknown; LOCATED IN: cell wall, plasma membrane, vacuole, plant-type cell wall; EXPRESSED IN: 19 plant structures; EXPRESSED DURING: 9 growth stages; CONTAINS InterPro DOMAIN/s: Acid phosphatase (Class B) (InterPro:IPR005519), Vegetative storage protein/acid phosphatase (Int…	Acid phosphatase (Class B) | Acid phosphatase, plant | HAD-like domain | Vegetative storage protein/acid phosphatase	NO
AT1G04120	1.00033	6.96965	4.44037e-05	0.00127717	UP	multidrug resistance-associated protein 5	multidrug resistance-associated protein 5 (MRP5); CONTAINS InterPro DOMAIN/s: ATPase, AAA+ type, core (InterPro:IPR003593), ABC transporter-like (InterPro:IPR003439), ABC transporter integral membrane type 1 (InterPro:IPR017940), ABC transporter, transmembrane domain, type 1 (InterPro:IPR011527), ABC transporter, transmembrane domain (InterPro:IPR001140), ABC transporter, conserved site (InterPro…	AAA+ ATPase domain | ABC transporter type 1, transmembrane domain | ABC transporter, conserved site | ABC transporter, transmembrane domain | ABC transporter-like | P-loop containing nucleoside triphosphate hydrolase	NO
AT1G04220	1.91728	4.19345	7.6626e-09	6.68611e-07	UP	3-ketoacyl-CoA synthase 2	3-ketoacyl-CoA synthase 2 (KCS2); FUNCTIONS IN: fatty acid elongase activity; INVOLVED IN: response to wounding, response to osmotic stress, suberin biosynthetic process; LOCATED IN: membrane; EXPRESSED IN: 17 plant structures; EXPRESSED DURING: 6 growth stages; CONTAINS InterPro DOMAIN/s: Thiolase-like (InterPro:IPR016039), Very-long-chain 3-ketoacyl-CoA synthase (InterPro:IPR012392), 3-Oxoacyl-…	3-Oxoacyl-[acyl-carrier-protein (ACP)] synthase III C-terminal | FAE1/Type III polyketide synthase-like protein | Thiolase-like | Thiolase-like, subgroup | Very-long-chain 3-ketoacyl-CoA synthase	NO
AT1G04425	-1.42723	1.62479	0.000652107	0.0116766	DOWN	other RNA			NO
AT1G04700	1.18038	2.053	0.00113086	0.0182056	UP	PB1 domain-containing protein tyrosine kinase	PB1 domain-containing protein tyrosine kinase; FUNCTIONS IN: protein serine/threonine/tyrosine kinase activity, protein kinase activity; INVOLVED IN: protein amino acid phosphorylation; LOCATED IN: cytosol; EXPRESSED IN: 22 plant structures; EXPRESSED DURING: 14 growth stages; CONTAINS InterPro DOMAIN/s: Octicosapeptide/Phox/Bem1p (InterPro:IPR000270), Protein kinase, ATP binding site (InterPro:I…	Phox/Bem1p | Protein kinase domain | Protein kinase, ATP binding site | Protein kinase-like domain | Serine-threonine/tyrosine-protein kinase catalytic domain | Serine/threonine-protein kinase, active site	NO
AT1G04760	1.48694	2.21459	2.0663e-05	0.000680302	UP	vesicle-associated membrane protein 726	vesicle-associated membrane protein 726 (VAMP726); FUNCTIONS IN: molecular_function unknown; INVOLVED IN: transport, vesicle-mediated transport; LOCATED IN: endosome, plasma membrane, chloroplast, membrane; EXPRESSED IN: 22 plant structures; EXPRESSED DURING: 13 growth stages; CONTAINS InterPro DOMAIN/s: Longin (InterPro:IPR010908), Longin-like (InterPro:IPR011012), Synaptobrevin (InterPro:IPR001…	Longin domain | Longin-like domain | Synaptobrevin	NO
AT1G05135	-0.92904	3.78329	0.00325372	0.0429888	DOWN		expressed protein, isoform contains a non-consensus TG acceptor site at intron		NO
AT1G05170	1.76277	4.65512	2.14837e-09	2.15998e-07	UP	Galactosyltransferase family protein	Galactosyltransferase family protein; FUNCTIONS IN: transferase activity, transferring hexosyl groups, transferase activity, transferring glycosyl groups; INVOLVED IN: protein amino acid glycosylation; LOCATED IN: endomembrane system, membrane; LOCATED IN: membrane; EXPRESSED IN: 14 plant structures; EXPRESSED DURING: 4 anthesis, C globular stage, 4 leaf senescence stage, petal differentiation an…	Domain of unknown function DUF4094 | Glycosyl transferase, family 31	NO
AT1G05200	1.60269	6.74754	3.05032e-11	4.69123e-09	UP	glutamate receptor 3.4	glutamate receptor 3.4 (GLR3.4); FUNCTIONS IN: protein binding, intracellular ligand-gated ion channel activity; INVOLVED IN: cellular calcium ion homeostasis, response to light stimulus; LOCATED IN: integral to membrane, membrane; EXPRESSED IN: 20 plant structures; EXPRESSED DURING: 13 growth stages; CONTAINS InterPro DOMAIN/s: Extracellular solute-binding protein, family 3 (InterPro:IPR001638),…	Extracellular ligand-binding receptor | Extracellular solute-binding protein, family 3 | Ionotropic glutamate receptor | Ionotropic glutamate receptor, plant | Periplasmic binding protein-like I	NO
AT1G05250	1.60058	3.9172	0.003008	0.0403475	UP	Peroxidase superfamily protein	Peroxidase superfamily protein; FUNCTIONS IN: peroxidase activity, heme binding; INVOLVED IN: response to oxidative stress, oxidation reduction; LOCATED IN: endomembrane system; CONTAINS InterPro DOMAIN/s: Haem peroxidase (InterPro:IPR010255), Plant peroxidase (InterPro:IPR000823), Peroxidases heam-ligand binding site (InterPro:IPR019793), Peroxidase, active site (InterPro:IPR019794), Haem peroxi…	Haem peroxidase | Haem peroxidase, plant/fungal/bacterial | Peroxidase, active site | Peroxidases heam-ligand binding site | Plant peroxidase	NO
AT1G05260	1.6921	5.04342	3.83113e-09	3.6658e-07	UP	Peroxidase superfamily protein	RARE COLD INDUCIBLE GENE 3 (RCI3); FUNCTIONS IN: peroxidase activity; INVOLVED IN: response to desiccation, response to cold, hyperosmotic salinity response; LOCATED IN: endoplasmic reticulum; EXPRESSED IN: 12 plant structures; EXPRESSED DURING: 4 anthesis, petal differentiation and expansion stage, E expanded cotyledon stage; CONTAINS InterPro DOMAIN/s: Haem peroxidase (InterPro:IPR010255), Plan…	Haem peroxidase | Haem peroxidase, plant/fungal/bacterial | Peroxidase, active site | Peroxidases heam-ligand binding site | Plant peroxidase	NO
AT1G05280	2.26766	1.2664	1.3953e-07	8.9344e-06	UP	Protein of unknown function (DUF604)	Protein of unknown function (DUF604); CONTAINS InterPro DOMAIN/s: Protein of unknown function DUF604 (InterPro:IPR006740); BEST Arabidopsis thaliana protein match is: Protein of unknown function (DUF604) (TAIR:AT4G15240.1)	Protein of unknown function DUF604	NO
AT1G05320	0.855025	5.69533	0.000192168	0.00428921	UP		FUNCTIONS IN: molecular_function unknown; INVOLVED IN: biological_process unknown; LOCATED IN: cellular_component unknown; EXPRESSED IN: fruit, egg cell; CONTAINS InterPro DOMAIN/s: Prefoldin (InterPro:IPR009053); BEST Arabidopsis thaliana protein match is: unknown protein (TAIR:AT2G32240.1)		NO
AT1G05340	-1.81373	3.58292	0.000216831	0.00474226	DOWN		unknown protein; FUNCTIONS IN: molecular_function unknown; INVOLVED IN: biological_process unknown; LOCATED IN: chloroplast; EXPRESSED IN: 14 plant structures; EXPRESSED DURING: 7 growth stages; BEST Arabidopsis thaliana protein match is: unknown protein (TAIR:AT2G32210.1)	Cysteine-rich transmembrane CYSTM domain	NO
AT1G05500	1.07329	6.31679	1.60765e-06	7.68047e-05	UP	Calcium-dependent lipid-binding (CaLB domain) family protein	NTMC2T2.1; FUNCTIONS IN: molecular_function unknown; INVOLVED IN: biological_process unknown; LOCATED IN: endomembrane system, plasma membrane; EXPRESSED IN: 25 plant structures; EXPRESSED DURING: 13 growth stages; CONTAINS InterPro DOMAIN/s: C2 membrane targeting protein (InterPro:IPR018029), C2 calcium/lipid-binding domain, CaLB (InterPro:IPR008973), C2 region (InterPro:IPR020477), C2 calcium-d…	C2 domain	YES	1:1626166:C-T;intronic_variant
AT1G05530	2.07388	0.771075	5.65153e-06	0.000227691	UP	UDP-glucosyl transferase 75B2	UDP-glucosyl transferase 75B2 (UGT75B2); FUNCTIONS IN: UDP-glycosyltransferase activity, UDP-glucosyltransferase activity, transferase activity, transferring glycosyl groups, abscisic acid glucosyltransferase activity; INVOLVED IN: metabolic process; EXPRESSED IN: sperm cell, root; CONTAINS InterPro DOMAIN/s: UDP-glucuronosyl/UDP-glucosyltransferase (InterPro:IPR002213); BEST Arabidopsis thaliana…	UDP-glucuronosyl/UDP-glucosyltransferase	NO
AT1G05575	-1.87013	0.752767	1.73698e-05	0.000587382	DOWN		unknown protein; FUNCTIONS IN: molecular_function unknown; INVOLVED IN: anaerobic respiration; LOCATED IN: endomembrane system; EXPRESSED IN: 17 plant structures; EXPRESSED DURING: 9 growth stages; BEST Arabidopsis thaliana protein match is: unknown protein (TAIR:AT2G31945.1)		NO
AT1G05660	1.81789	1.02498	4.93784e-05	0.00139477	UP	Pectin lyase-like superfamily protein	Pectin lyase-like superfamily protein; FUNCTIONS IN: polygalacturonase activity; INVOLVED IN: carbohydrate metabolic process; LOCATED IN: endomembrane system; CONTAINS InterPro DOMAIN/s: Pectin lyase fold/virulence factor (InterPro:IPR011050), Pectin lyase fold (InterPro:IPR012334), Glycoside hydrolase, family 28 (InterPro:IPR000743), Parallel beta-helix repeat (InterPro:IPR006626); BEST Arabidop…	Glycoside hydrolase, family 28 | Parallel beta-helix repeat | Pectin lyase fold | Pectin lyase fold/virulence factor	NO
AT1G05675	-3.53545	-0.523739	0.0036329	0.0467835	DOWN	UDP-Glycosyltransferase superfamily protein	UDP-Glycosyltransferase superfamily protein; FUNCTIONS IN: transferase activity, transferring hexosyl groups; INVOLVED IN: metabolic process; CONTAINS InterPro DOMAIN/s: UDP-glucuronosyl/UDP-glucosyltransferase (InterPro:IPR002213); BEST Arabidopsis thaliana protein match is: Uridine diphosphate glycosyltransferase 74E2 (TAIR:AT1G05680.1)	UDP-glucuronosyl/UDP-glucosyltransferase	NO
AT1G05783	-1.66249	-0.608711	0.00225409	0.0319261	DOWN				NO
AT1G05894	1.96651	-0.197127	7.13368e-05	0.0018771	UP		unknown protein; LOCATED IN: chloroplast; BEST Arabidopsis thaliana protein match is: unknown protein (TAIR:AT2G31480.1)		NO
AT1G05990	4.07329	-1.25986	8.72585e-07	4.51452e-05	UP	EF hand calcium-binding protein family	EF hand calcium-binding protein family; FUNCTIONS IN: calcium ion binding; LOCATED IN: cellular_component unknown; EXPRESSED IN: root hair; CONTAINS InterPro DOMAIN/s: Parvalbumin (InterPro:IPR008080), EF-Hand 1, calcium-binding site (InterPro:IPR018247), EF-HAND 2 (InterPro:IPR018249), EF-hand-like domain (InterPro:IPR011992), Calcium-binding EF-hand (InterPro:IPR002048), EF-hand (InterPro:IPR01…	EF-Hand 1, calcium-binding site | EF-hand domain | EF-hand domain pair	NO
AT1G06050	0.983183	2.75081	0.00221515	0.0314141	UP	Protein of unknown function (DUF1336)	Protein of unknown function (DUF1336); CONTAINS InterPro DOMAIN/s: Protein of unknown function DUF1336 (InterPro:IPR009769); BEST Arabidopsis thaliana protein match is: Protein of unknown function (DUF1336) (TAIR:AT5G10750.1)	Domain of unknown function DUF1336	NO
AT1G06100	1.37819	1.17459	0.000343121	0.00692015	UP	Fatty acid desaturase family protein	Fatty acid desaturase family protein; FUNCTIONS IN: oxidoreductase activity, oxidoreductase activity, acting on paired donors, with oxidation of a pair of donors resulting in the reduction of molecular oxygen to two molecules of water; INVOLVED IN: oxidation reduction, lipid metabolic process; EXPRESSED IN: 17 plant structures; EXPRESSED DURING: 11 growth stages; CONTAINS InterPro DOMAIN/s: Fatty…	Fatty acid desaturase, type 1 | Fatty acid desaturase, type 1, core	NO
AT1G06120	2.55944	0.347548	4.20715e-08	3.08046e-06	UP	Fatty acid desaturase family protein	Fatty acid desaturase family protein; FUNCTIONS IN: oxidoreductase activity, oxidoreductase activity, acting on paired donors, with oxidation of a pair of donors resulting in the reduction of molecular oxygen to two molecules of water; INVOLVED IN: oxidation reduction, lipid metabolic process; CONTAINS InterPro DOMAIN/s: Fatty acid desaturase, type 1, core (InterPro:IPR015876), Fatty acid desatur…	Fatty acid desaturase, type 1 | Fatty acid desaturase, type 1, core	NO
AT1G06265	0.804665	4.0922	0.00298419	0.0400919	UP	other RNA			NO
AT1G06320	2.9483	-1.28104	5.97513e-05	0.00163484	UP		unknown protein		NO
AT1G06350	2.05296	3.38494	2.30558e-05	0.000745243	UP	Fatty acid desaturase family protein	Fatty acid desaturase family protein; FUNCTIONS IN: oxidoreductase activity, oxidoreductase activity, acting on paired donors, with oxidation of a pair of donors resulting in the reduction of molecular oxygen to two molecules of water; INVOLVED IN: oxidation reduction, lipid metabolic process; CONTAINS InterPro DOMAIN/s: Fatty acid desaturase, type 1, core (InterPro:IPR015876), Fatty acid desatur…	Fatty acid desaturase, type 1 | Fatty acid desaturase, type 1, core	NO
AT1G06970	1.9649	-1.64147	0.00329312	0.0433772	UP	cation/hydrogen exchanger 14	cation/hydrogen exchanger 14 (CHX14); FUNCTIONS IN: monovalent cation:hydrogen antiporter activity, sodium:hydrogen antiporter activity; INVOLVED IN: cation transport; LOCATED IN: integral to membrane; EXPRESSED IN: 6 plant structures; EXPRESSED DURING: L mature pollen stage, M germinated pollen stage, 4 anthesis; CONTAINS InterPro DOMAIN/s: Cation/H+ exchanger (InterPro:IPR006153); BEST Arabidop…	Cation/H+ exchanger	NO
AT1G07175	3.62595	-1.56417	7.20848e-06	0.000278477	UP		unknown protein; FUNCTIONS IN: molecular_function unknown; INVOLVED IN: biological_process unknown; LOCATED IN: endomembrane system; BEST Arabidopsis thaliana protein match is: unknown protein (TAIR:AT2G29995.1)		NO
AT1G07400	2.69881	2.50208	0.00290606	0.0393563	UP	HSP20-like chaperones superfamily protein	HSP20-like chaperones superfamily protein; CONTAINS InterPro DOMAIN/s: Heat shock protein Hsp20 (InterPro:IPR002068), HSP20-like chaperone (InterPro:IPR008978); BEST Arabidopsis thaliana protein match is: HSP20-like chaperones superfamily protein (TAIR:AT1G59860.1)	Alpha crystallin/Hsp20 domain | HSP20-like chaperone	NO
AT1G07410	1.08274	1.71332	0.00241794	0.0337221	UP	RAB GTPase homolog A2B	RAB GTPase homolog A2B (RABA2b); FUNCTIONS IN: GTP binding, GTPase activity; INVOLVED IN: intracellular protein transport, signal transduction, nucleocytoplasmic transport, protein transport, small GTPase mediated signal transduction; LOCATED IN: endosome, plasma membrane, cell plate; EXPRESSED IN: 21 plant structures; EXPRESSED DURING: 7 growth stages; CONTAINS InterPro DOMAIN/s: Ran GTPase (Int…	P-loop containing nucleoside triphosphate hydrolase | Small GTP-binding protein domain | Small GTPase superfamily | Small GTPase superfamily, Rab type	YES	1:2277123:C-T;protein_coding;missense;GCA>GTA;A>V
AT1G07430	-1.39298	3.72672	0.00342909	0.0447136	DOWN	highly ABA-induced PP2C gene 2	highly ABA-induced PP2C gene 2 (HAI2); FUNCTIONS IN: protein serine/threonine phosphatase activity, catalytic activity; INVOLVED IN: protein amino acid dephosphorylation; LOCATED IN: protein serine/threonine phosphatase complex; EXPRESSED IN: 17 plant structures; EXPRESSED DURING: 9 growth stages; CONTAINS InterPro DOMAIN/s: Protein phosphatase 2C, manganese/magnesium aspartate binding site (Inte…	Protein phosphatase 2C | Protein phosphatase 2C (PP2C)-like domain | Protein phosphatase 2C, manganese/magnesium aspartate binding site	NO
AT1G07485	2.40284	0.666535	2.42736e-05	0.000774203	UP		unknown protein; FUNCTIONS IN: molecular_function unknown; INVOLVED IN: biological_process unknown; LOCATED IN: cellular_component unknown; EXPRESSED IN: shoot apex, embryo, leaf whorl, pedicel; EXPRESSED DURING: 4 anthesis, D bilateral stage		NO
AT1G07550	-2.16201	-1.14017	0.00281813	0.0384748	DOWN	Leucine-rich repeat protein kinase family protein	Leucine-rich repeat protein kinase family protein; FUNCTIONS IN: kinase activity; INVOLVED IN: protein amino acid phosphorylation; LOCATED IN: endomembrane system; EXPRESSED IN: root, leaf; EXPRESSED DURING: LP.08 eight leaves visible; CONTAINS InterPro DOMAIN/s: Protein kinase, ATP binding site (InterPro:IPR017441), Protein kinase, catalytic domain (InterPro:IPR000719), Leucine-rich repeat (Inte…	Concanavalin A-like lectin/glucanase, subgroup | Leucine-rich repeat | Malectin-like carbohydrate-binding domain | Protein kinase domain | Protein kinase, ATP binding site | Protein kinase-like domain | Serine/threonine-protein kinase, active site	NO
AT1G07570	0.992383	4.87349	0.000252313	0.00538881	UP	Protein kinase superfamily protein	APK1A; FUNCTIONS IN: protein serine/threonine kinase activity, kinase activity; INVOLVED IN: protein amino acid phosphorylation; INVOLVED IN: protein amino acid phosphorylation, N-terminal protein myristoylation; EXPRESSED IN: 20 plant structures; LOCATED IN: plasma membrane; EXPRESSED DURING: 8 growth stages; CONTAINS InterPro DOMAIN/s: Protein kinase, ATP binding site (InterPro:IPR017441), Seri…	Concanavalin A-like lectin/glucanase, subgroup | Protein kinase domain | Protein kinase, ATP binding site | Protein kinase-like domain | Serine-threonine/tyrosine-protein kinase catalytic domain | Serine/threonine-protein kinase, active site	NO
AT1G07610	1.34839	6.52731	3.09202e-07	1.82967e-05	UP	metallothionein 1C	metallothionein 1C (MT1C); FUNCTIONS IN: copper ion binding; INVOLVED IN: response to copper ion; LOCATED IN: cytosolic ribosome; EXPRESSED IN: 22 plant structures; EXPRESSED DURING: 14 growth stages; BEST Arabidopsis thaliana protein match is: metallothionein 1A (TAIR:AT1G07600.1)		NO
AT1G07630	1.20526	5.37183	6.98279e-08	4.84097e-06	UP	pol-like 5	pol-like 5 (PLL5); FUNCTIONS IN: protein serine/threonine phosphatase activity, catalytic activity; INVOLVED IN: N-terminal protein myristoylation, leaf development; LOCATED IN: plasma membrane; EXPRESSED IN: 23 plant structures; EXPRESSED DURING: 13 growth stages; CONTAINS InterPro DOMAIN/s: Protein phosphatase 2C-related (InterPro:IPR001932), Protein phosphatase 2C (InterPro:IPR015655), Protein…	Protein phosphatase 2C | Protein phosphatase 2C (PP2C)-like domain	NO
AT1G07710	2.35137	-1.12731	0.000841135	0.0143082	UP	Ankyrin repeat family protein	Ankyrin repeat family protein; CONTAINS InterPro DOMAIN/s: Ankyrin repeat-containing domain (InterPro:IPR020683), Ankyrin repeat (InterPro:IPR002110); BEST Arabidopsis thaliana protein match is: ankyrin repeat family protein (TAIR:AT5G60070.1)	Ankyrin repeat | Ankyrin repeat-containing domain | PGG domain	NO
AT1G07730	2.24695	1.08579	2.27159e-05	0.000736374	UP	Disease resistance-responsive (dirigent-like protein) family protein	Disease resistance-responsive (dirigent-like protein) family protein; FUNCTIONS IN: molecular_function unknown; INVOLVED IN: biological_process unknown; LOCATED IN: endomembrane system; CONTAINS InterPro DOMAIN/s: Plant disease resistance response protein (InterPro:IPR004265); BEST Arabidopsis thaliana protein match is: Disease resistance-responsive (dirigent-like protein) family protein (TAIR:AT…	Plant disease resistance response protein	NO
AT1G07795	4.34837	-1.98601	2.26615e-05	0.000735458	UP		unknown protein; BEST Arabidopsis thaliana protein match is: unknown protein (TAIR:AT2G28725.1)		NO
AT1G08035	2.09133	-0.207808	0.000232249	0.00502078	UP		unknown protein; BEST Arabidopsis thaliana protein match is: unknown protein (TAIR:AT2G28330.1)		NO
AT1G08340	1.44833	2.20081	3.7128e-05	0.00110274	UP	Rho GTPase activating protein with PAK-box/P21-Rho-binding domain	Rho GTPase activating protein with PAK-box/P21-Rho-binding domain; FUNCTIONS IN: Rac GTPase activator activity; INVOLVED IN: signal transduction; LOCATED IN: intracellular; EXPRESSED IN: 23 plant structures; EXPRESSED DURING: 13 growth stages; CONTAINS InterPro DOMAIN/s: PAK-box/P21-Rho-binding (InterPro:IPR000095), Rho GTPase activation protein (InterPro:IPR008936), RhoGAP (InterPro:IPR000198); …	CRIB domain | Rho GTPase activation protein | Rho GTPase-activating protein domain	NO
AT1G08430	1.2552	3.37398	0.000602102	0.01095	UP	aluminum-activated malate transporter 1	aluminum-activated malate transporter 1 (ALMT1); CONTAINS InterPro DOMAIN/s: Malate transporter, aliminium toerance (InterPro:IPR020966); BEST Arabidopsis thaliana protein match is: Aluminium activated malate transporter family protein (TAIR:AT1G08440.1)	Aluminum-activated malate transporter	NO
AT1G08590	1.22022	2.66758	0.000392475	0.00772884	UP	Leucine-rich receptor-like protein kinase family protein	Leucine-rich receptor-like protein kinase family protein; FUNCTIONS IN: kinase activity; INVOLVED IN: protein amino acid phosphorylation; LOCATED IN: endomembrane system; EXPRESSED IN: hypocotyl, root, leaf; EXPRESSED DURING: LP.08 eight leaves visible; CONTAINS InterPro DOMAIN/s: Protein kinase, catalytic domain (InterPro:IPR000719), Leucine-rich repeat-containing N-terminal domain, type 2 (Inte…	Leucine rich repeat 4 | Leucine-rich repeat | Leucine-rich repeat-containing N-terminal, type 2 | Protein kinase domain | Protein kinase-like domain | Serine/threonine-protein kinase, active site	NO
AT1G08620	1.81078	6.47966	4.06158e-15	1.36798e-12	UP	Transcription factor jumonji (jmj) family protein / zinc finger (C5HC2 type) family protein	PKDM7D; FUNCTIONS IN: sequence-specific DNA binding transcription factor activity; INVOLVED IN: regulation of transcription; LOCATED IN: nucleus; EXPRESSED IN: 23 plant structures; EXPRESSED DURING: 15 growth stages; CONTAINS InterPro DOMAIN/s: Transcription factor jumonji/aspartyl beta-hydroxylase (InterPro:IPR003347), FY-rich, C-terminal (InterPro:IPR003889), FY-rich, N-terminal (InterPro:IPR00…	FY-rich, C-terminal | FY-rich, N-terminal | JmjC domain | Transcription factor jumonji, JmjN | Zinc finger, C5HC2-type	NO
AT1G08670	1.58194	0.648576	0.000238198	0.00512635	UP	ENTH/VHS family protein	ENTH/VHS family protein; CONTAINS InterPro DOMAIN/s: Epsin, N-terminal (InterPro:IPR001026), Epsin-like, N-terminal (InterPro:IPR013809), ENTH/VHS (InterPro:IPR008942); BEST Arabidopsis thaliana protein match is: ENTH/VHS family protein (TAIR:AT3G46540.1)	ENTH/VHS | Epsin domain, N-terminal | Epsin-like, N-terminal	NO
AT1G08680	0.848139	6.13325	0.000332455	0.00676991	UP	ARF GAP-like zinc finger-containing protein ZIGA4	ARF GAP-like zinc finger-containing protein ZIGA4 (ZIGA4); FUNCTIONS IN: ARF GTPase activator activity, DNA binding, zinc ion binding; INVOLVED IN: regulation of ARF GTPase activity; LOCATED IN: nucleus; LOCATED IN: nucleus, plasma membrane; EXPRESSED IN: 22 plant structures; EXPRESSED IN: 23 plant structures; EXPRESSED DURING: 13 growth stages; CONTAINS InterPro DOMAIN/s: Arf GTPase activating p…	Arf GTPase activating protein	NO
AT1G08735	3.00442	-0.127782	7.17348e-09	6.30836e-07	UP	transposable element gene	Mutator-like transposase family, has a 3.3e-87 P-value blast match to Q9SLM0 /314-478 Pfam PF03108 MuDR family transposase (MuDr-element domain)		NO
AT1G08860	2.96276	-0.658716	4.90303e-07	2.72507e-05	UP	Calcium-dependent phospholipid-binding Copine family protein	BONZAI 3 (BON3); FUNCTIONS IN: calcium-dependent phospholipid binding; INVOLVED IN: N-terminal protein myristoylation, cellular homeostasis, positive regulation of cellular defense response, negative regulation of cell death; EXPRESSED IN: sperm cell, male gametophyte, flower, pollen tube; EXPRESSED DURING: L mature pollen stage, M germinated pollen stage, 4 anthesis, petal differentiation and ex…	C2 domain | Copine | von Willebrand factor, type A	NO
AT1G08930	-1.11984	6.39809	0.000266776	0.00563341	DOWN	Major facilitator superfamily protein	EARLY RESPONSE TO DEHYDRATION 6 (ERD6); FUNCTIONS IN: carbohydrate transmembrane transporter activity, sugar:hydrogen symporter activity, sugar transmembrane transporter activity; INVOLVED IN: response to water deprivation, response to salt stress, response to cold, response to chitin, response to abscisic acid stimulus; LOCATED IN: integral to membrane, membrane; EXPRESSED IN: 30 plant structure…	General substrate transporter | Major facilitator superfamily domain | Major facilitator superfamily domain, general substrate transporter | Sugar transporter, conserved site | Sugar/inositol transporter	NO
AT1G08990	1.69085	2.61206	2.99148e-07	1.77387e-05	UP	plant glycogenin-like starch initiation protein 5	plant glycogenin-like starch initiation protein 5 (PGSIP5); FUNCTIONS IN: transferase activity, transferring glycosyl groups; INVOLVED IN: biosynthetic process; LOCATED IN: endomembrane system; EXPRESSED IN: root; CONTAINS InterPro DOMAIN/s: Glycosyl transferase, family 8 (InterPro:IPR002495); BEST Arabidopsis thaliana protein match is: plant glycogenin-like starch initiation protein 4 (TAIR:AT1G…	Glycosyl transferase, family 8 | Nucleotide-diphospho-sugar transferases	NO
AT1G09090	1.42914	2.32605	0.000409621	0.00800258	UP	respiratory burst oxidase homolog B	respiratory burst oxidase homolog B (RBOHB); FUNCTIONS IN: NAD(P)H oxidase activity; INVOLVED IN: response to heat, seed germination, defense response; LOCATED IN: integral to membrane, membrane; EXPRESSED IN: embryo, root; EXPRESSED DURING: imbibition; CONTAINS InterPro DOMAIN/s: Ferredoxin reductase-type FAD-binding domain (InterPro:IPR017927), Cytochrome b245, heavy chain (InterPro:IPR000778),…	Cytochrome b245, heavy chain | EF-hand domain | EF-hand domain pair | FAD-binding 8 | Ferredoxin reductase-type FAD-binding domain | Ferric reductase transmembrane component-like domain | Ferric reductase, NAD binding | NADPH oxidase Respiratory burst | Respiratory burst oxidase homologue protein B | Riboflavin synthase-like beta-barrel	NO
AT1G09157	2.97793	-2.34416	0.00159524	0.0239383	UP	Protein of unknown function (DUF679)	Protein of unknown function (DUF679); LOCATED IN: chloroplast; CONTAINS InterPro DOMAIN/s: Protein of unknown function DUF679 (InterPro:IPR007770); BEST Arabidopsis thaliana protein match is: Protein of unknown function (DUF679) (TAIR:AT5G39650.1)	Protein of unknown function DUF679	NO
AT1G09170	2.16962	1.80784	3.38828e-07	1.97783e-05	UP	P-loop nucleoside triphosphate hydrolases superfamily protein with CH (Calponin Homology) domain	P-loop nucleoside triphosphate hydrolases superfamily protein with CH (Calponin Homology) domain; FUNCTIONS IN: microtubule motor activity, ATP binding; INVOLVED IN: microtubule-based movement; EXPRESSED IN: shoot, male gametophyte, root, flower, pollen tube; EXPRESSED DURING: L mature pollen stage, M germinated pollen stage, 4 anthesis; CONTAINS InterPro DOMAIN/s: Kinesin, motor region, conserve…	Calponin homology domain | Kinesin, motor domain | Kinesin, motor region, conserved site | Kinesin-like protein | P-loop containing nucleoside triphosphate hydrolase	NO
AT1G09200	1.03187	5.92783	9.65143e-06	0.000356825	UP	Histone superfamily protein	Histone superfamily protein; FUNCTIONS IN: DNA binding; INVOLVED IN: nucleosome assembly; LOCATED IN: chloroplast, nucleosome; EXPRESSED IN: 24 plant structures; EXPRESSED DURING: 15 growth stages; CONTAINS InterPro DOMAIN/s: Histone H3 (InterPro:IPR000164), Histone-fold (InterPro:IPR009072), Histone core (InterPro:IPR007125); BEST Arabidopsis thaliana protein match is: Histone superfamily protei…	Histone H3/CENP-A | Histone core | Histone-fold	NO
AT1G09415	-1.10724	4.17743	0.000113087	0.00275806	DOWN	NIM1-interacting 3	NIM1-interacting 3 (NIMIN-3)		NO
AT1G09470	1.30987	3.45036	3.27865e-05	0.000993059	UP		unknown protein; FUNCTIONS IN: molecular_function unknown; BEST Arabidopsis thaliana protein match is: unknown protein (TAIR:AT5G26770.1); EXPRESSED IN: cotyledon		NO
AT1G09540	1.99701	1.72438	2.4338e-05	0.000775523	UP	myb domain protein 61	myb domain protein 61 (MYB61); CONTAINS InterPro DOMAIN/s: SANT, DNA-binding (InterPro:IPR001005), Homeodomain-like (InterPro:IPR009057), Myb, DNA-binding (InterPro:IPR014778), HTH transcriptional regulator, Myb-type, DNA-binding (InterPro:IPR017930), Homeodomain-related (InterPro:IPR012287), Myb transcription factor (InterPro:IPR015495); BEST Arabidopsis thaliana protein match is: myb domain pro…	Homeodomain-like | Myb domain | SANT/Myb domain	NO
AT1G09560	0.895435	5.75501	0.000100605	0.00250628	UP	germin-like protein 5	germin-like protein 5 (GLP5); FUNCTIONS IN: manganese ion binding, nutrient reservoir activity; INVOLVED IN: response to cold; LOCATED IN: cell wall, nucleus; EXPRESSED IN: 22 plant structures; EXPRESSED DURING: 14 growth stages; CONTAINS InterPro DOMAIN/s: Cupin, RmlC-type (InterPro:IPR011051), Cupin 1 (InterPro:IPR006045), Germin (InterPro:IPR001929), RmlC-like jelly roll fold (InterPro:IPR0147…	Cupin 1 | Germin | Germin, manganese binding site | RmlC-like cupin domain | RmlC-like jelly roll fold	NO
AT1G09600	1.5758	1.18953	0.000113482	0.00276451	UP	Protein kinase superfamily protein	Protein kinase superfamily protein; FUNCTIONS IN: protein serine/threonine kinase activity, protein kinase activity, kinase activity, ATP binding; INVOLVED IN: protein amino acid phosphorylation, N-terminal protein myristoylation; LOCATED IN: cellular_component unknown; EXPRESSED IN: 18 plant structures; EXPRESSED DURING: 11 growth stages; CONTAINS InterPro DOMAIN/s: Protein kinase, ATP binding s…	Protein kinase domain | Protein kinase, ATP binding site | Protein kinase-like domain | Serine/threonine-protein kinase, active site | Serine/threonine/dual specificity protein kinase, catalytic domain	NO
AT1G09880	1.98556	0.154746	1.75596e-05	0.000592608	UP	Rhamnogalacturonate lyase family protein	Rhamnogalacturonate lyase family protein; CONTAINS InterPro DOMAIN/s: Rhamnogalacturonate lyase (InterPro:IPR010325), Carbohydrate-binding-like fold (InterPro:IPR013784), Galactose-binding domain-like (InterPro:IPR008979); BEST Arabidopsis thaliana protein match is: Rhamnogalacturonate lyase family protein (TAIR:AT1G09890.1)	Carbohydrate-binding-like fold | Carboxypeptidase, regulatory domain | Galactose mutarotase-like domain | Galactose-binding domain-like | Rhamnogalacturonan lyase, domain II | Rhamnogalacturonan lyase, domain III | Rhamnogalacturonate lyase	NO
AT1G09920	1.56089	5.75636	1.58909e-11	2.63656e-09	UP	TRAF-type zinc finger-related	TRAF-type zinc finger-related; BEST Arabidopsis thaliana protein match is: Ubiquitin fusion degradation UFD1 family protein (TAIR:AT4G15420.1)		NO
AT1G09932	3.10238	2.0518	6.78211e-15	2.21775e-12	UP	Phosphoglycerate mutase family protein	Phosphoglycerate mutase family protein; FUNCTIONS IN: molecular_function unknown; INVOLVED IN: biological_process unknown; LOCATED IN: cellular_component unknown; CONTAINS InterPro DOMAIN/s: Histidine phosphatase superfamily, clade-1 (InterPro:IPR013078); BEST Arabidopsis thaliana protein match is: Phosphoglycerate mutase family protein (TAIR:AT2G17280.2)	Histidine phosphatase superfamily | Histidine phosphatase superfamily, clade-1	NO
AT1G10120	0.97672	5.32175	1.8676e-05	0.000624653	UP	basic helix-loop-helix (bHLH) DNA-binding superfamily protein	basic helix-loop-helix (bHLH) DNA-binding superfamily protein; FUNCTIONS IN: DNA binding, sequence-specific DNA binding transcription factor activity; INVOLVED IN: regulation of transcription; LOCATED IN: nucleus; EXPRESSED IN: 22 plant structures; EXPRESSED DURING: 13 growth stages; CONTAINS InterPro DOMAIN/s: Helix-loop-helix DNA-binding domain (InterPro:IPR001092), Helix-loop-helix DNA-binding…	Myc-type, basic helix-loop-helix (bHLH) domain	NO
AT1G10200	1.21765	7.77823	1.18838e-07	7.71211e-06	UP	GATA type zinc finger transcription factor family protein	WLIM1; FUNCTIONS IN: sequence-specific DNA binding transcription factor activity, zinc ion binding; INVOLVED IN: biological_process unknown; LOCATED IN: plasma membrane; EXPRESSED IN: 23 plant structures; EXPRESSED DURING: 13 growth stages; CONTAINS InterPro DOMAIN/s: Zinc finger, LIM-type (InterPro:IPR001781); BEST Arabidopsis thaliana protein match is: GATA type zinc finger transcription factor…	Zinc finger, LIM-type	NO
AT1G10240	1.2424	4.63744	1.01255e-07	6.70015e-06	UP	FAR1-related sequence 11	FAR1-related sequence 11 (FRS11); FUNCTIONS IN: zinc ion binding; INVOLVED IN: response to red or far red light; LOCATED IN: cellular_component unknown; EXPRESSED IN: 20 plant structures; EXPRESSED DURING: 12 growth stages; CONTAINS InterPro DOMAIN/s: MULE transposase, conserved domain (InterPro:IPR018289), Transcription factor, FAR1-related (InterPro:IPR004330), Zinc finger, PMZ-type (InterPro:I…	FAR1 DNA binding domain | MULE transposase domain | Zinc finger, PMZ-type | Zinc finger, SWIM-type	NO
AT1G10300	1.58827	0.712008	0.000120494	0.00290922	UP	Nucleolar GTP-binding protein	Nucleolar GTP-binding protein; FUNCTIONS IN: GTP binding; EXPRESSED IN: carpel; EXPRESSED DURING: 4 anthesis, petal differentiation and expansion stage; CONTAINS InterPro DOMAIN/s: GTP1/OBG (InterPro:IPR006073), Nucleolar GTP-binding 1 (InterPro:IPR010674), NOG, C-terminal (InterPro:IPR012973); BEST Arabidopsis thaliana protein match is: Nucleolar GTP-binding protein (TAIR:AT1G50920.1)	GTP binding domain | NOG, C-terminal | Nucleolar GTP-binding protein 1 | Nucleolar GTP-binding protein 1, Rossman-fold domain | P-loop containing nucleoside triphosphate hydrolase	NO
AT1G10530	1.89422	1.28171	2.86211e-06	0.000126508	UP		unknown protein; FUNCTIONS IN: molecular_function unknown; INVOLVED IN: N-terminal protein myristoylation; BEST Arabidopsis thaliana protein match is: unknown protein (TAIR:AT1G60010.1)	Protein of unknown function DUF4228, plant	NO
AT1G10650	1.33893	4.84072	1.75202e-07	1.08874e-05	UP	SBP (S-ribonuclease binding protein) family protein	SBP (S-ribonuclease binding protein) family protein; FUNCTIONS IN: zinc ion binding; INVOLVED IN: biological_process unknown; LOCATED IN: cellular_component unknown; EXPRESSED IN: 24 plant structures; EXPRESSED DURING: 15 growth stages; CONTAINS InterPro DOMAIN/s: Zinc finger, RING-type (InterPro:IPR001841), S-ribonuclease binding protein, SBP1, pollen (InterPro:IPR017066); BEST Arabidopsis thali…	S-ribonuclease binding protein, SBP1, pollen | Zinc finger, RING-type	NO
AT1G10680	6.95192	1.81636	6.18237e-29	1.48735e-25	UP	P-glycoprotein 10	P-glycoprotein 10 (PGP10); FUNCTIONS IN: ATPase activity, coupled to transmembrane movement of substances; INVOLVED IN: transport, transmembrane transport; LOCATED IN: mitochondrion; EXPRESSED IN: sperm cell, male gametophyte; EXPRESSED DURING: L mature pollen stage, M germinated pollen stage; CONTAINS InterPro DOMAIN/s: ATPase, AAA+ type, core (InterPro:IPR003593), ABC transporter-like (InterPro…	AAA+ ATPase domain | ABC transporter type 1, transmembrane domain | ABC transporter, conserved site | ABC transporter, transmembrane domain | ABC transporter-like | P-loop containing nucleoside triphosphate hydrolase	NO
AT1G10682	-1.93283	4.88442	1.19501e-16	5.6689e-14	DOWN	other RNA			NO
AT1G10920	0.988388	4.06739	8.22163e-05	0.00211545	UP	NB-ARC domain-containing disease resistance protein	LOV1; FUNCTIONS IN: ATP binding; INVOLVED IN: defense response to fungus, response to molecule of fungal origin, defense response; LOCATED IN: cellular_component unknown; EXPRESSED IN: 14 plant structures; EXPRESSED DURING: 7 growth stages; CONTAINS InterPro DOMAIN/s: NB-ARC (InterPro:IPR002182), Disease resistance protein (InterPro:IPR000767); BEST Arabidopsis thaliana protein match is: Disease …	NB-ARC | P-loop containing nucleoside triphosphate hydrolase	NO
AT1G11000	0.865627	4.35037	0.000366768	0.00730954	UP	Seven transmembrane MLO family protein	MILDEW RESISTANCE LOCUS O 4 (MLO4); FUNCTIONS IN: calmodulin binding; INVOLVED IN: cell death, defense response; LOCATED IN: integral to membrane, plasma membrane; EXPRESSED IN: 18 plant structures; EXPRESSED DURING: 7 growth stages; CONTAINS InterPro DOMAIN/s: Mlo-related protein (InterPro:IPR004326); BEST Arabidopsis thaliana protein match is: Seven transmembrane MLO family protein (TAIR:AT5G53…	Mlo-related protein	NO
AT1G11080	1.04144	4.04818	0.000328664	0.0067008	UP	serine carboxypeptidase-like 31	serine carboxypeptidase-like 31 (scpl31); FUNCTIONS IN: serine-type carboxypeptidase activity; INVOLVED IN: proteolysis; LOCATED IN: endomembrane system; EXPRESSED IN: 17 plant structures; EXPRESSED DURING: 4 anthesis, C globular stage, petal differentiation and expansion stage, E expanded cotyledon stage, D bilateral stage; CONTAINS InterPro DOMAIN/s: Peptidase S10, serine carboxypeptidase (Inte…	Alpha/Beta hydrolase fold | Peptidase S10, serine carboxypeptidase | Peptidase S10, serine carboxypeptidase, active site	NO
AT1G11185	1.43032	1.6084	0.00206808	0.0296812	UP	other RNA			NO
AT1G11190	1.22049	2.1544	0.000652512	0.0116776	UP	bifunctional nuclease i	bifunctional nuclease i (BFN1); FUNCTIONS IN: T/G mismatch-specific endonuclease activity, endoribonuclease activity, producing 5'-phosphomonoesters, single-stranded DNA specific endodeoxyribonuclease activity, nucleic acid binding; INVOLVED IN: DNA catabolic process; LOCATED IN: endomembrane system; EXPRESSED IN: 18 plant structures; EXPRESSED DURING: 8 growth stages; CONTAINS InterPro DOMAIN/s:…	Phospholipase C/P1 nuclease domain | S1/P1 nuclease	NO
AT1G11210	-1.1026	6.11056	9.5601e-05	0.00240473	DOWN	Protein of unknown function (DUF761)	Protein of unknown function (DUF761); FUNCTIONS IN: molecular_function unknown; INVOLVED IN: response to oxidative stress; LOCATED IN: endomembrane system; EXPRESSED IN: 10 plant structures; EXPRESSED DURING: LP.06 six leaves visible, LP.04 four leaves visible, 4 anthesis, petal differentiation and expansion stage; CONTAINS InterPro DOMAIN/s: Protein of unknown function DUF761, plant (InterPro:IP…	Domain of unknown function DUF4408 | Protein of unknown function DUF761, plant	NO
AT1G11545	1.05506	4.08447	0.000141697	0.00334209	UP	xyloglucan endotransglucosylase/hydrolase 8	xyloglucan endotransglucosylase/hydrolase 8 (XTH8); FUNCTIONS IN: hydrolase activity, acting on glycosyl bonds, xyloglucan:xyloglucosyl transferase activity, hydrolase activity, hydrolyzing O-glycosyl compounds; INVOLVED IN: carbohydrate metabolic process, cellular glucan metabolic process; LOCATED IN: endomembrane system, cell wall, apoplast; EXPRESSED IN: 21 plant structures; EXPRESSED DURING: …	Beta-glucanase | Concanavalin A-like lectin/glucanase, subgroup | Concanavalin A-like lectin/glucanases superfamily | Glycoside hydrolase, family 16 | Glycoside hydrolase, family 16, active site | Xyloglucan endo-transglycosylase, C-terminal | Xyloglucan endotransglucosylase/hydrolase	NO
AT1G11580	1.55136	6.15908	2.29688e-10	2.91928e-08	UP	methylesterase PCR A	methylesterase PCR A (PMEPCRA); FUNCTIONS IN: enzyme inhibitor activity, pectinesterase activity; INVOLVED IN: cell wall modification; LOCATED IN: cell wall, plasma membrane, plant-type cell wall; EXPRESSED IN: 25 plant structures; EXPRESSED DURING: 13 growth stages; CONTAINS InterPro DOMAIN/s: Pectinesterase, active site (InterPro:IPR018040), Pectin lyase fold/virulence factor (InterPro:IPR01105…	Pectin lyase fold | Pectin lyase fold/virulence factor | Pectinesterase inhibitor domain | Pectinesterase, active site | Pectinesterase, catalytic	NO
AT1G11655	2.14959	-0.997453	0.00211616	0.030278	UP		unknown protein; BEST Arabidopsis thaliana protein match is: unknown protein (TAIR:AT4G21902.1)		NO
AT1G11700	1.48828	3.64829	2.98356e-05	0.000916037	UP	Protein of unknown function, DUF584	Protein of unknown function, DUF584; FUNCTIONS IN: molecular_function unknown; INVOLVED IN: biological_process unknown; LOCATED IN: chloroplast; EXPRESSED IN: 21 plant structures; EXPRESSED DURING: 11 growth stages; CONTAINS InterPro DOMAIN/s: Protein of unknown function DUF584 (InterPro:IPR007608); BEST Arabidopsis thaliana protein match is: Protein of unknown function, DUF584 (TAIR:AT1G61930.1)	Senescence regulator S40	NO
AT1G11735	1.30818	1.35797	0.000676276	0.0120009	UP	MIR171B; miRNA			NO
AT1G11740	1.73479	-0.0820515	0.000253339	0.00540386	UP	ankyrin repeat family protein	ankyrin repeat family protein; CONTAINS InterPro DOMAIN/s: Ankyrin repeat-containing domain (InterPro:IPR020683), Protein of unknown function DUF3424 (InterPro:IPR021832), Ankyrin repeat (InterPro:IPR002110); BEST Arabidopsis thaliana protein match is: Ankyrin repeat family protein (TAIR:AT1G62050.1)	Ankyrin repeat | Ankyrin repeat domain-containing protein 13 | Ankyrin repeat-containing domain	NO
AT1G11785	2.56927	0.270217	4.51553e-08	3.25669e-06	UP		unknown protein; FUNCTIONS IN: molecular_function unknown; INVOLVED IN: biological_process unknown; LOCATED IN: cellular_component unknown		NO
AT1G11840	0.67451	8.07504	0.00308815	0.0412746	UP	glyoxalase I homolog	glyoxalase I homolog (GLX1); FUNCTIONS IN: lactoylglutathione lyase activity, metal ion binding; INVOLVED IN: carbohydrate metabolic process; INVOLVED IN: response to cadmium ion, carbohydrate metabolic process; LOCATED IN: peroxisome; LOCATED IN: peroxisome, plasma membrane, vacuole; LOCATED IN: peroxisome, plasma membrane, vacuole, chloroplast envelope; EXPRESSED IN: 25 plant structures; EXPRES…	Glyoxalase I | Glyoxalase I, conserved site | Glyoxalase/Bleomycin resistance protein/Dihydroxybiphenyl dioxygenase | Glyoxalase/fosfomycin resistance/dioxygenase domain	NO
AT1G11920	3.6555	-0.702191	3.12469e-06	0.000136501	UP	Pectin lyase-like superfamily protein	Pectin lyase-like superfamily protein; FUNCTIONS IN: lyase activity, pectate lyase activity; INVOLVED IN: biological_process unknown; LOCATED IN: endomembrane system; EXPRESSED IN: flower; EXPRESSED DURING: petal differentiation and expansion stage; CONTAINS InterPro DOMAIN/s: Pectin lyase fold/virulence factor (InterPro:IPR011050), AmbAllergen (InterPro:IPR018082), Pectate lyase/Amb allergen (In…	AmbAllergen | Pectate lyase/Amb allergen | Pectin lyase fold | Pectin lyase fold/virulence factor	NO
AT1G11950	2.83862	5.90422	2.85668e-21	2.34673e-18	UP	Transcription factor jumonji (jmjC) domain-containing protein	Transcription factor jumonji (jmjC) domain-containing protein; CONTAINS InterPro DOMAIN/s: Transcription factor jumonji/aspartyl beta-hydroxylase (InterPro:IPR003347), Transcription factor jumonji (InterPro:IPR013129); BEST Arabidopsis thaliana protein match is: transcription factor jumonji (jmjC) domain-containing protein (TAIR:AT1G62310.1)	JmjC domain	NO
AT1G12080	1.71816	4.84164	2.06496e-13	5.19028e-11	UP	Vacuolar calcium-binding protein-related	Vacuolar calcium-binding protein-related; BEST Arabidopsis thaliana protein match is: Vacuolar calcium-binding protein-related (TAIR:AT1G62480.1)		NO
AT1G12150	1.95187	0.0697984	0.00014653	0.00343442	UP	Plant protein of unknown function (DUF827)	Plant protein of unknown function (DUF827); CONTAINS InterPro DOMAIN/s: Protein of unknown function DUF827, plant (InterPro:IPR008545); BEST Arabidopsis thaliana protein match is: Plant protein of unknown function (DUF827) (TAIR:AT4G17210.1)	WEB family	NO
AT1G12560	1.9389	2.78148	2.24586e-05	0.000730349	UP	expansin A7	expansin A7 (EXPA7); INVOLVED IN: plant-type cell wall modification involved in multidimensional cell growth, unidimensional cell growth, plant-type cell wall loosening; LOCATED IN: endomembrane system, extracellular region; EXPRESSED IN: sperm cell, root hair, root; CONTAINS InterPro DOMAIN/s: Barwin-related endoglucanase (InterPro:IPR009009), Pollen allergen, N-terminal (InterPro:IPR014734), Ex…	Barwin-like endoglucanase | Expansin | Expansin, cellulose-binding-like domain | Expansin/Lol pI | Expansin/pollen allergen, DPBB domain | RlpA-like double-psi beta-barrel domain	NO
AT1G12740	1.10505	3.40315	0.00130835	0.0204201	UP	cytochrome P450, family 87, subfamily A, polypeptide 2	cytochrome P450, family 87, subfamily A, polypeptide 2 (CYP87A2); FUNCTIONS IN: electron carrier activity, monooxygenase activity, iron ion binding, oxygen binding, heme binding; INVOLVED IN: oxidation reduction; EXPRESSED IN: root; CONTAINS InterPro DOMAIN/s: Cytochrome P450 (InterPro:IPR001128), Cytochrome P450, E-class, group I (InterPro:IPR002401), Cytochrome P450, conserved site (InterPro:IP…	Cytochrome P450 | Cytochrome P450, E-class, group I | Cytochrome P450, conserved site	NO
AT1G12790	-1.24083	3.11785	6.86877e-05	0.00182245	DOWN		CONTAINS InterPro DOMAIN/s: RuvA domain 2-like (InterPro:IPR010994)	RuvA domain 2-like	NO
AT1G12805	2.1141	1.27782	0.000298456	0.00617084	UP	nucleotide binding	nucleotide binding		NO
AT1G13110	-0.893824	6.05882	6.36791e-05	0.00171582	DOWN	cytochrome P450, family 71 subfamily B, polypeptide 7	cytochrome P450, family 71 subfamily B, polypeptide 7 (CYP71B7); FUNCTIONS IN: electron carrier activity, monooxygenase activity, iron ion binding, oxygen binding, heme binding; INVOLVED IN: oxidation reduction; EXPRESSED IN: 22 plant structures; EXPRESSED DURING: 13 growth stages; CONTAINS InterPro DOMAIN/s: Cytochrome P450 (InterPro:IPR001128), Cytochrome P450, E-class, group I (InterPro:IPR002…	Cytochrome P450 | Cytochrome P450, E-class, group I | Cytochrome P450, conserved site	NO
AT1G13190	-0.896147	5.39428	0.000154925	0.00359368	DOWN	RNA-binding (RRM/RBD/RNP motifs) family protein	RNA-binding (RRM/RBD/RNP motifs) family protein; FUNCTIONS IN: RNA binding, nucleotide binding, nucleic acid binding; EXPRESSED IN: 22 plant structures; EXPRESSED DURING: 13 growth stages; CONTAINS InterPro DOMAIN/s: RNA recognition motif, RNP-1 (InterPro:IPR000504), Nucleotide-binding, alpha-beta plait (InterPro:IPR012677); BEST Arabidopsis thaliana protein match is: RNA-binding (RRM/RBD/RNP mot…	Nucleotide-binding, alpha-beta plait | RNA recognition motif domain	NO
AT1G13270	-0.894018	6.01579	0.00287506	0.0390463	DOWN	methionine aminopeptidase 1B	methionine aminopeptidase 1B (MAP1C); FUNCTIONS IN: metalloexopeptidase activity, aminopeptidase activity; INVOLVED IN: proteolysis, N-terminal protein amino acid modification; LOCATED IN: mitochondrion, chloroplast; EXPRESSED IN: 22 plant structures; EXPRESSED DURING: 13 growth stages; CONTAINS InterPro DOMAIN/s: Peptidase M24, structural domain (InterPro:IPR000994), Peptidase M24A, methionine a…	Peptidase M24, methionine aminopeptidase | Peptidase M24, structural domain | Peptidase M24A, methionine aminopeptidase, subfamily 1	NO
AT1G13340	1.74599	1.53135	1.86192e-06	8.66178e-05	UP	Regulator of Vps4 activity in the MVB pathway protein	Regulator of Vps4 activity in the MVB pathway protein; CONTAINS InterPro DOMAIN/s: Protein of unknown function DUF292, eukaryotic (InterPro:IPR005061); BEST Arabidopsis thaliana protein match is: Regulator of Vps4 activity in the MVB pathway protein (TAIR:AT1G34220.2)	Domain of unknown function DUF292, eukaryotic	NO
AT1G13390	1.07298	5.85038	2.03301e-06	9.27831e-05	UP		unknown protein; BEST Arabidopsis thaliana protein match is: unknown protein (TAIR:AT1G68490.1)		NO
AT1G13420	1.96296	1.5638	0.00392848	0.0496306	UP	sulfotransferase 4B	sulfotransferase 4B (ST4B); CONTAINS InterPro DOMAIN/s: Sulfotransferase domain (InterPro:IPR000863); BEST Arabidopsis thaliana protein match is: sulfotransferase 4A (TAIR:AT2G14920.1)	P-loop containing nucleoside triphosphate hydrolase | Sulfotransferase domain	NO
AT1G13590	1.29192	2.54452	0.000149836	0.00349253	UP	phytosulfokine 1 precursor	phytosulfokine 1 precursor (PSK1); FUNCTIONS IN: growth factor activity; INVOLVED IN: cell growth; LOCATED IN: extracellular matrix; EXPRESSED IN: root; CONTAINS InterPro DOMAIN/s: Phytosulfokine (InterPro:IPR009438)	Phytosulfokine	NO
AT1G13600	2.03103	0.679122	4.64722e-05	0.00132534	UP	basic leucine-zipper 58	basic leucine-zipper 58 (bZIP58); FUNCTIONS IN: DNA binding, protein homodimerization activity, protein heterodimerization activity, sequence-specific DNA binding transcription factor activity; INVOLVED IN: regulation of transcription, DNA-dependent; EXPRESSED IN: 16 plant structures; EXPRESSED DURING: 7 growth stages; CONTAINS InterPro DOMAIN/s: Basic-leucine zipper (bZIP) transcription factor (…	Basic-leucine zipper domain	NO
AT1G13610	3.59075	0.369522	2.63399e-05	0.000829115	UP	alpha/beta-Hydrolases superfamily protein	alpha/beta-Hydrolases superfamily protein; FUNCTIONS IN: serine-type peptidase activity; CONTAINS InterPro DOMAIN/s: Alpha/beta hydrolase fold-1 (InterPro:IPR000073); INVOLVED IN: proteolysis; EXPRESSED IN: cotyledon, hypocotyl, root; CONTAINS InterPro DOMAIN/s: Peptidase S9, prolyl oligopeptidase, catalytic domain (InterPro:IPR001375); BEST Arabidopsis thaliana protein match is: alpha/beta-Hydro…	Alpha/Beta hydrolase fold | Alpha/beta hydrolase fold-5	NO
AT1G13620	2.11226	-1.18519	0.000486924	0.00916206	UP		root meristem growth factor 2 (RGF2); FUNCTIONS IN: molecular_function unknown; INVOLVED IN: regulation of root meristem growth, positive regulation of gene expression; LOCATED IN: endomembrane system; BEST Arabidopsis thaliana protein match is: unknown protein (TAIR:AT2G04025.1)		NO
AT1G13830	1.5533	1.53752	9.47632e-05	0.00238723	UP	Carbohydrate-binding X8 domain superfamily protein	Carbohydrate-binding X8 domain superfamily protein; FUNCTIONS IN: molecular_function unknown; INVOLVED IN: biological_process unknown; LOCATED IN: endomembrane system; EXPRESSED IN: 8 plant structures; EXPRESSED DURING: 4 anthesis, petal differentiation and expansion stage; CONTAINS InterPro DOMAIN/s: X8 (InterPro:IPR012946); BEST Arabidopsis thaliana protein match is: Carbohydrate-binding X8 dom…	X8	NO
AT1G13880	3.48202	7.40925	7.29228e-45	4.91223e-41	UP	ELM2 domain-containing protein	ELM2 domain-containing protein; FUNCTIONS IN: DNA binding; INVOLVED IN: biological_process unknown; EXPRESSED IN: 24 plant structures; EXPRESSED DURING: 15 growth stages; CONTAINS InterPro DOMAIN/s: SANT, DNA-binding (InterPro:IPR001005), ELM2 (InterPro:IPR000949); BEST Arabidopsis thaliana protein match is: ELM2 domain-containing protein (TAIR:AT2G03470.2)	ELM2 domain | SANT/Myb domain	NO
AT1G13970	1.23336	2.83165	9.80741e-05	0.00245047	UP	Protein of unknown function (DUF1336)	Protein of unknown function (DUF1336); FUNCTIONS IN: molecular_function unknown; INVOLVED IN: N-terminal protein myristoylation; EXPRESSED IN: 20 plant structures; EXPRESSED DURING: 10 growth stages; CONTAINS InterPro DOMAIN/s: Protein of unknown function DUF1336 (InterPro:IPR009769); BEST Arabidopsis thaliana protein match is: Protein of unknown function (DUF1336) (TAIR:AT3G29180.2)	Domain of unknown function DUF1336	NO
AT1G14080	1.93071	1.69947	1.35832e-05	0.000476559	UP	fucosyltransferase 6	fucosyltransferase 6 (FUT6); FUNCTIONS IN: transferase activity, transferring glycosyl groups, fucosyltransferase activity; INVOLVED IN: cell wall biogenesis; LOCATED IN: endomembrane system, membrane; EXPRESSED IN: stem, root, flower; CONTAINS InterPro DOMAIN/s: Xyloglucan fucosyltransferase (InterPro:IPR004938); BEST Arabidopsis thaliana protein match is: fucosyltransferase 4 (TAIR:AT2G15390.2)	Xyloglucan fucosyltransferase	NO
AT1G14160	1.82995	1.54576	1.99752e-05	0.000661539	UP	Uncharacterised protein family (UPF0497)	Uncharacterised protein family (UPF0497); CONTAINS InterPro DOMAIN/s: Uncharacterised protein family UPF0497, trans-membrane plant (InterPro:IPR006702), Uncharacterised protein family UPF0497, trans-membrane plant subgroup (InterPro:IPR006459); BEST Arabidopsis thaliana protein match is: Uncharacterised protein family (UPF0497) (TAIR:AT5G15290.1)	Uncharacterised protein family UPF0497, trans-membrane plant | Uncharacterised protein family UPF0497, trans-membrane plant subgroup	NO
AT1G14220	2.06496	-0.097108	5.79437e-05	0.00159315	UP	Ribonuclease T2 family protein	Ribonuclease T2 family protein; FUNCTIONS IN: ribonuclease T2 activity, endoribonuclease activity, RNA binding; INVOLVED IN: N-terminal protein myristoylation; LOCATED IN: endomembrane system; EXPRESSED IN: sperm cell, root, egg cell; CONTAINS InterPro DOMAIN/s: Ribonuclease T2 (InterPro:IPR001568), Ribonuclease T2, active site (InterPro:IPR018188); BEST Arabidopsis thaliana protein match is: rib…	Ribonuclease T2, active site | Ribonuclease T2-like	NO
AT1G14240	1.76607	1.79342	9.03316e-06	0.000337301	UP	GDA1/CD39 nucleoside phosphatase family protein	GDA1/CD39 nucleoside phosphatase family protein; FUNCTIONS IN: hydrolase activity; INVOLVED IN: biological_process unknown; LOCATED IN: cellular_component unknown; EXPRESSED IN: 20 plant structures; EXPRESSED DURING: 11 growth stages; CONTAINS InterPro DOMAIN/s: Nucleoside phosphatase GDA1/CD39 (InterPro:IPR000407); BEST Arabidopsis thaliana protein match is: GDA1/CD39 nucleoside phosphatase fami…	Nucleoside phosphatase GDA1/CD39	NO
AT1G14440	0.708265	5.2452	0.00173056	0.0255308	UP	homeobox protein 31	homeobox protein 31 (HB31); FUNCTIONS IN: DNA binding, sequence-specific DNA binding transcription factor activity; INVOLVED IN: regulation of transcription; LOCATED IN: cellular_component unknown; EXPRESSED IN: 17 plant structures; EXPRESSED DURING: 11 growth stages; CONTAINS InterPro DOMAIN/s: Homeobox domain, ZF-HD class (InterPro:IPR006455), ZF-HD homeobox protein, Cys/His-rich dimerisation d…	Homeodomain, ZF-HD class | Homeodomain-like | ZF-HD homeobox protein, Cys/His-rich dimerisation domain	NO
AT1G14700	0.957334	6.08191	9.0357e-05	0.00229511	UP	purple acid phosphatase 3	purple acid phosphatase 3 (PAP3); CONTAINS InterPro DOMAIN/s: Metallophosphoesterase (InterPro:IPR004843); FUNCTIONS IN: protein serine/threonine phosphatase activity, acid phosphatase activity; BEST Arabidopsis thaliana protein match is: purple acid phosphatase 8 (TAIR:AT2G01890.1); LOCATED IN: vacuole; EXPRESSED IN: 22 plant structures; EXPRESSED DURING: 12 growth stages	Acid phosphatase, type 5 | Calcineurin-like phosphoesterase domain, apaH type | Metallo-dependent phosphatase-like	NO
AT1G14770	1.36385	3.77965	3.36516e-07	1.97069e-05	UP	RING/FYVE/PHD zinc finger superfamily protein	RING/FYVE/PHD zinc finger superfamily protein; FUNCTIONS IN: zinc ion binding; INVOLVED IN: biological_process unknown; LOCATED IN: cellular_component unknown; EXPRESSED IN: 13 plant structures; EXPRESSED DURING: 7 growth stages; CONTAINS InterPro DOMAIN/s: Zinc finger, PHD-type, conserved site (InterPro:IPR019786), Zinc finger, FYVE/PHD-type (InterPro:IPR011011); BEST Arabidopsis thaliana protei…	Zinc finger, FYVE/PHD-type | Zinc finger, PHD-type, conserved site | Zinc finger, RING/FYVE/PHD-type	NO
AT1G14880	8.28189	-0.242372	0.000304549	0.00627754	UP	PLANT CADMIUM RESISTANCE 1	PLANT CADMIUM RESISTANCE 1 (PCR1); FUNCTIONS IN: molecular_function unknown; INVOLVED IN: biological_process unknown; LOCATED IN: vacuole; CONTAINS InterPro DOMAIN/s: Protein of unknown function Cys-rich (InterPro:IPR006461); BEST Arabidopsis thaliana protein match is: PLANT CADMIUM RESISTANCE 2 (TAIR:AT1G14870.1)	Uncharacterised protein family Cys-rich	NO
AT1G15050	2.33113	0.944749	0.000658415	0.0117525	UP	indole-3-acetic acid inducible 34	indole-3-acetic acid inducible 34 (IAA34); FUNCTIONS IN: sequence-specific DNA binding transcription factor activity; INVOLVED IN: response to auxin stimulus; LOCATED IN: nucleus; CONTAINS InterPro DOMAIN/s: Aux/IAA-ARF-dimerisation (InterPro:IPR011525), AUX/IAA protein (InterPro:IPR003311); BEST Arabidopsis thaliana protein match is: indole-3-acetic acid inducible 32 (TAIR:AT2G01200.2)	AUX/IAA protein | Aux/IAA-ARF-dimerisation	NO
AT1G15100	0.883247	4.51855	0.00274228	0.0375916	UP	RING-H2 finger A2A	RING-H2 finger A2A (RHA2A); FUNCTIONS IN: ubiquitin-protein ligase activity, zinc ion binding; INVOLVED IN: response to salt stress, positive regulation of abscisic acid mediated signaling pathway, regulation of response to osmotic stress; LOCATED IN: endomembrane system; EXPRESSED IN: 21 plant structures; EXPRESSED DURING: 8 growth stages; CONTAINS InterPro DOMAIN/s: Zinc finger, RING-type (Inte…	Zinc finger, RING-type | Zinc finger, RING/FYVE/PHD-type	NO
AT1G15125	-1.62352	4.02177	0.00130564	0.0203872	DOWN	S-adenosyl-L-methionine-dependent methyltransferases superfamily protein	S-adenosyl-L-methionine-dependent methyltransferases superfamily protein; FUNCTIONS IN: S-adenosylmethionine-dependent methyltransferase activity, methyltransferase activity; INVOLVED IN: biological_process unknown; LOCATED IN: cellular_component unknown; CONTAINS InterPro DOMAIN/s: SAM dependent carboxyl methyltransferase (InterPro:IPR005299); BEST Arabidopsis thaliana protein match is: S-adenos…	S-adenosyl-L-methionine-dependent methyltransferase-like | SAM dependent carboxyl methyltransferase	NO
AT1G15210	1.53702	4.52083	3.85125e-09	3.67462e-07	UP	pleiotropic drug resistance 7	pleiotropic drug resistance 7 (PDR7); FUNCTIONS IN: ATPase activity, coupled to transmembrane movement of substances; INVOLVED IN: drug transmembrane transport; LOCATED IN: plasma membrane, chloroplast, membrane; EXPRESSED IN: 9 plant structures; EXPRESSED DURING: 4 anthesis, F mature embryo stage, petal differentiation and expansion stage, E expanded cotyledon stage, D bilateral stage; CONTAINS …	AAA+ ATPase domain | ABC transporter-like | ABC-2 type transporter | ABC-transporter extracellular N-terminal domain | P-loop containing nucleoside triphosphate hydrolase | Plant PDR ABC transporter associated	NO
AT1G15380	1.10322	3.65982	0.000667518	0.0118705	UP	Lactoylglutathione lyase / glyoxalase I family protein	Lactoylglutathione lyase / glyoxalase I family protein; CONTAINS InterPro DOMAIN/s: Glyoxalase/bleomycin resistance protein/dioxygenase (InterPro:IPR004360); BEST Arabidopsis thaliana protein match is: Lactoylglutathione lyase / glyoxalase I family protein (TAIR:AT1G80160.1)	Glyoxalase-like domain | Glyoxalase/Bleomycin resistance protein/Dihydroxybiphenyl dioxygenase	NO
AT1G15405	1.76032	0.465618	0.000152985	0.00355358	UP	other RNA			NO
AT1G15460	2.50317	1.24107	6.01663e-06	0.000239534	UP	HCO3- transporter family	REQUIRES HIGH BORON 4 (BOR4); CONTAINS InterPro DOMAIN/s: Bicarbonate transporter, eukaryotic (InterPro:IPR003020), Bicarbonate transporter, C-terminal (InterPro:IPR011531); BEST Arabidopsis thaliana protein match is: HCO3- transporter family (TAIR:AT1G74810.1)	Bicarbonate transporter, C-terminal | Bicarbonate transporter, eukaryotic	NO
AT1G15625	1.90886	-0.213077	4.57457e-05	0.00130906	UP				NO
AT1G15730	-0.725203	5.40786	0.000979557	0.0162037	DOWN	Cobalamin biosynthesis CobW-like protein	Cobalamin biosynthesis CobW-like protein; CONTAINS InterPro DOMAIN/s: Cobalamin (vitamin B12) biosynthesis CobW-like (InterPro:IPR003495), Cobalamin (vitamin B12) biosynthesis CobW-like, C-terminal (InterPro:IPR011629); BEST Arabidopsis thaliana protein match is: plastid transcriptionally active 17 (TAIR:AT1G80480.1)	CobW/HypB/UreG domain | Cobalamin (vitamin B12) biosynthesis CobW-like, C-terminal | P-loop containing nucleoside triphosphate hydrolase	NO
AT1G15790	1.12263	2.2222	0.00182183	0.0266166	UP		unknown protein; BEST Arabidopsis thaliana protein match is: unknown protein (TAIR:AT1G15780.1)	Coactivator CBP, KIX domain	NO
AT1G16060	1.61887	3.24928	4.8164e-07	2.6947e-05	UP	ARIA-interacting double AP2 domain protein	ARIA-interacting double AP2 domain protein (ADAP); CONTAINS InterPro DOMAIN/s: DNA-binding, integrase-type (InterPro:IPR016177), Pathogenesis-related transcriptional factor/ERF, DNA-binding (InterPro:IPR001471); BEST Arabidopsis thaliana protein match is: Integrase-type DNA-binding superfamily protein (TAIR:AT1G79700.2)	AP2/ERF domain | DNA-binding domain	NO
AT1G16110	-1.14959	3.58062	0.000420365	0.00814401	DOWN	wall associated kinase-like 6	wall associated kinase-like 6 (WAKL6); FUNCTIONS IN: kinase activity; INVOLVED IN: protein amino acid phosphorylation; LOCATED IN: endomembrane system, integral to membrane; CONTAINS InterPro DOMAIN/s: Wall-associated kinase (InterPro:IPR013695), Protein kinase, catalytic domain (InterPro:IPR000719), Serine/threonine-protein kinase domain (InterPro:IPR002290), Tyrosine-protein kinase, catalytic d…	Concanavalin A-like lectin/glucanase, subgroup | Protein kinase domain | Protein kinase-like domain | Serine/threonine-protein kinase, active site | Wall-associated receptor kinase | Wall-associated receptor kinase galacturonan-binding domain	NO
AT1G16140	-2.029	-0.94144	0.000473913	0.00896735	DOWN				NO
AT1G16160	1.90899	-0.353295	0.000228063	0.00495255	UP	wall associated kinase-like 5	wall associated kinase-like 5 (WAKL5); FUNCTIONS IN: kinase activity; INVOLVED IN: protein amino acid phosphorylation; LOCATED IN: integral to membrane, chloroplast; EXPRESSED IN: 9 plant structures; EXPRESSED DURING: 7 growth stages; CONTAINS InterPro DOMAIN/s: Wall-associated kinase (InterPro:IPR013695), Protein kinase, catalytic domain (InterPro:IPR000719), EGF-like calcium-binding, conserved …		NO
AT1G16270	0.788889	5.87371	0.000600164	0.0109274	UP	Protein kinase superfamily protein with octicosapeptide/Phox/Bem1p domain	Protein kinase superfamily protein with octicosapeptide/Phox/Bem1p domain; FUNCTIONS IN: protein serine/threonine/tyrosine kinase activity, protein kinase activity; INVOLVED IN: protein amino acid phosphorylation; LOCATED IN: cytosol, nucleus; CONTAINS InterPro DOMAIN/s: Octicosapeptide/Phox/Bem1p (InterPro:IPR000270), Protein kinase, ATP binding site (InterPro:IPR017441), Protein kinase, catalyt…	Phox/Bem1p | Protein kinase domain | Protein kinase, ATP binding site | Protein kinase-like domain | Serine-threonine/tyrosine-protein kinase catalytic domain | Serine/threonine-protein kinase, active site	YES	1:5568259:C-A;exonic_variant
AT1G16360	2.45062	-0.307313	0.000267849	0.00565252	UP	LEM3 (ligand-effect modulator 3) family protein / CDC50 family protein	LEM3 (ligand-effect modulator 3) family protein / CDC50 family protein; INVOLVED IN: biological_process unknown; LOCATED IN: membrane; EXPRESSED IN: 8 plant structures; EXPRESSED DURING: L mature pollen stage, M germinated pollen stage, 4 anthesis, petal differentiation and expansion stage; CONTAINS InterPro DOMAIN/s: Protein of unknown function DUF284, transmembrane eukaryotic (InterPro:IPR00504…	CDC50/LEM3 family	NO
AT1G16370	-3.11425	0.691975	2.42541e-10	3.05955e-08	DOWN	organic cation/carnitine transporter 6	organic cation/carnitine transporter 6 (OCT6); FUNCTIONS IN: carbohydrate transmembrane transporter activity, sugar:hydrogen symporter activity; INVOLVED IN: transport, transmembrane transport; LOCATED IN: integral to membrane, membrane; EXPRESSED IN: 11 plant structures; EXPRESSED DURING: LP.06 six leaves visible, 4 anthesis, petal differentiation and expansion stage; CONTAINS InterPro DOMAIN/s:…	General substrate transporter | Major facilitator superfamily domain | Major facilitator superfamily domain, general substrate transporter	NO
AT1G16400	-3.05958	3.23417	5.15625e-13	1.14255e-10	DOWN	cytochrome P450, family 79, subfamily F, polypeptide 2	cytochrome P450, family 79, subfamily F, polypeptide 2 (CYP79F2); CONTAINS InterPro DOMAIN/s: Cytochrome P450 (InterPro:IPR001128), Cytochrome P450, E-class, group I (InterPro:IPR002401), Cytochrome P450, conserved site (InterPro:IPR017972); BEST Arabidopsis thaliana protein match is: cytochrome p450 79f1 (TAIR:AT1G16410.1)	Cytochrome P450 | Cytochrome P450, E-class, group I | Cytochrome P450, conserved site	NO
AT1G16440	1.93458	0.794135	0.000112642	0.00275268	UP	root hair specific 3	root hair specific 3 (RSH3); FUNCTIONS IN: kinase activity; INVOLVED IN: protein amino acid phosphorylation; LOCATED IN: plasma membrane; EXPRESSED IN: root hair; CONTAINS InterPro DOMAIN/s: Protein kinase, catalytic domain (InterPro:IPR000719), Serine/threonine-protein kinase domain (InterPro:IPR002290), Tyrosine-protein kinase, catalytic domain (InterPro:IPR020635), Serine/threonine-protein kin…	Protein kinase domain | Protein kinase-like domain | Serine/threonine-protein kinase, active site | Serine/threonine/dual specificity protein kinase, catalytic domain	NO
AT1G16635	2.27533	-0.802254	0.000597661	0.0108928	UP				NO
AT1G16750	1.98216	5.42301	3.42863e-17	1.83301e-14	UP	Protein of unknown function, DUF547	Protein of unknown function, DUF547; CONTAINS InterPro DOMAIN/s: Protein of unknown function DUF547 (InterPro:IPR006869); BEST Arabidopsis thaliana protein match is: Protein of unknown function, DUF547 (TAIR:AT3G13000.2)	Domain of unknown function DUF547 | Ternary complex factor MIP1, leucine-zipper	NO
AT1G17240	-1.66742	-0.556473	0.00157638	0.0237133	DOWN	receptor like protein 2	receptor like protein 2 (RLP2); CONTAINS InterPro DOMAIN/s: Leucine-rich repeat-containing N-terminal domain, type 2 (InterPro:IPR013210), Leucine-rich repeat (InterPro:IPR001611); BEST Arabidopsis thaliana protein match is: Leucine-rich receptor-like protein kinase family protein (TAIR:AT1G72300.1)	Leucine-rich repeat | Leucine-rich repeat-containing N-terminal, type 2	NO
AT1G17420	-2.93899	2.46171	2.20263e-08	1.70153e-06	DOWN	lipoxygenase 3	lipoxygenase 3 (LOX3); FUNCTIONS IN: oxidoreductase activity, acting on single donors with incorporation of molecular oxygen, incorporation of two atoms of oxygen, lipoxygenase activity, iron ion binding, metal ion binding; INVOLVED IN: growth, response to fungus, jasmonic acid biosynthetic process, response to wounding, defense response; LOCATED IN: chloroplast; EXPRESSED IN: 22 plant structures…	Lipase/lipooxygenase, PLAT/LH2 | Lipoxygenase | Lipoxygenase, C-terminal | Lipoxygenase, conserved site | Lipoxygenase, domain 3 | Lipoxygenase, iron binding site | Lipoxygenase, plant | PLAT/LH2 domain	NO
AT1G17460	-0.764658	3.82181	0.00328551	0.0432939	DOWN	TRF-like 3	TRF-like 3 (TRFL3); FUNCTIONS IN: DNA binding, sequence-specific DNA binding transcription factor activity; INVOLVED IN: regulation of transcription; EXPRESSED IN: 17 plant structures; LOCATED IN: cytosolic ribosome; EXPRESSED DURING: 12 growth stages; CONTAINS InterPro DOMAIN/s: SANT, DNA-binding (InterPro:IPR001005), Myb, DNA-binding (InterPro:IPR014778), Homeodomain-like (InterPro:IPR009057), …	Homeodomain-like | Myb domain | SANT/Myb domain	NO
AT1G17480	0.960498	2.41054	0.00339798	0.0443938	UP	IQ-domain 7	IQ-domain 7 (IQD7); CONTAINS InterPro DOMAIN/s: IQ calmodulin-binding region (InterPro:IPR000048); BEST Arabidopsis thaliana protein match is: IQ-domain 8 (TAIR:AT1G72670.1)	IQ motif, EF-hand binding site | P-loop containing nucleoside triphosphate hydrolase	NO
AT1G17620	0.663937	4.72484	0.00364064	0.0468375	UP	Late embryogenesis abundant (LEA) hydroxyproline-rich glycoprotein family	Late embryogenesis abundant (LEA) hydroxyproline-rich glycoprotein family; FUNCTIONS IN: molecular_function unknown; INVOLVED IN: biological_process unknown; LOCATED IN: plasma membrane; EXPRESSED IN: 23 plant structures; EXPRESSED DURING: 13 growth stages; CONTAINS InterPro DOMAIN/s: Late embryogenesis abundant protein, group 2 (InterPro:IPR004864); BEST Arabidopsis thaliana protein match is: un…	Late embryogenesis abundant protein, LEA-14	NO
AT1G17860	0.639472	5.91639	0.0038876	0.0492804	UP	Kunitz family trypsin and protease inhibitor protein	Kunitz family trypsin and protease inhibitor protein; FUNCTIONS IN: endopeptidase inhibitor activity; INVOLVED IN: biological_process unknown; LOCATED IN: apoplast, cell wall; EXPRESSED IN: 17 plant structures; EXPRESSED DURING: 13 growth stages; CONTAINS InterPro DOMAIN/s: Proteinase inhibitor I3, Kunitz legume (InterPro:IPR002160), Kunitz inhibitor ST1-like (InterPro:IPR011065); BEST Arabidopsi…	Kunitz inhibitor ST1-like | Proteinase inhibitor I3, Kunitz legume	NO
AT1G17940	0.973213	4.89689	0.000133536	0.00317405	UP	Endosomal targeting BRO1-like domain-containing protein	Endosomal targeting BRO1-like domain-containing protein; FUNCTIONS IN: molecular_function unknown; INVOLVED IN: N-terminal protein myristoylation; LOCATED IN: cellular_component unknown; CONTAINS InterPro DOMAIN/s: BRO1 (InterPro:IPR004328); BEST Arabidopsis thaliana protein match is: Endosomal targeting BRO1-like domain-containing protein (TAIR:AT1G73390.3)	BRO1 domain	NO
AT1G18010	2.29038	1.05962	0.00201655	0.0290378	UP	Major facilitator superfamily protein	Major facilitator superfamily protein; FUNCTIONS IN: molecular_function unknown; INVOLVED IN: transmembrane transport; LOCATED IN: cellular_component unknown; CONTAINS InterPro DOMAIN/s: Major facilitator superfamily MFS-1 (InterPro:IPR011701), Major facilitator superfamily, general substrate transporter (InterPro:IPR016196); BEST Arabidopsis thaliana protein match is: Major facilitator superfami…	Ion channel regulatory protein, UNC-93 | Major facilitator superfamily domain, general substrate transporter	NO
AT1G18075	2.55779	3.13998	3.73709e-08	2.77244e-06	UP	MIR159/MIR159B; miRNA			NO
AT1G18100	1.37479	3.18521	0.000288937	0.00599981	UP	PEBP (phosphatidylethanolamine-binding protein) family protein	E12A11; CONTAINS InterPro DOMAIN/s: Phosphatidylethanolamine-binding, conserved site (InterPro:IPR001858), Phosphatidylethanolamine-binding protein PEBP (InterPro:IPR008914); BEST Arabidopsis thaliana protein match is: PEBP (phosphatidylethanolamine-binding protein) family protein (TAIR:AT5G03840.1)	Phosphatidylethanolamine-binding protein PEBP | Phosphatidylethanolamine-binding, conserved site	NO
AT1G18197	2.47292	-0.0560061	1.77786e-06	8.33986e-05	UP				NO
AT1G18420	1.73049	1.23694	0.000714283	0.012504	UP	Aluminium activated malate transporter family protein	Aluminium activated malate transporter family protein; INVOLVED IN: response to aluminum ion; CONTAINS InterPro DOMAIN/s: Malate transporter, aliminium toerance (InterPro:IPR020966); BEST Arabidopsis thaliana protein match is: aluminum-activated malate transporter 9 (TAIR:AT3G18440.1)	Aluminum-activated malate transporter	NO
AT1G18570	-1.2827	3.9644	1.86029e-05	0.000622827	DOWN	myb domain protein 51	myb domain protein 51 (MYB51); CONTAINS InterPro DOMAIN/s: SANT, DNA-binding (InterPro:IPR001005), Homeodomain-like (InterPro:IPR009057), Myb, DNA-binding (InterPro:IPR014778), HTH transcriptional regulator, Myb-type, DNA-binding (InterPro:IPR017930), Homeodomain-related (InterPro:IPR012287), Myb transcription factor (InterPro:IPR015495); BEST Arabidopsis thaliana protein match is: myb domain pro…	Homeodomain-like | Myb domain | SANT/Myb domain	NO
AT1G18620	0.840016	7.09914	0.00311746	0.0415509	UP		unknown protein; FUNCTIONS IN: molecular_function unknown; INVOLVED IN: biological_process unknown; LOCATED IN: cellular_component unknown; EXPRESSED IN: 22 plant structures; EXPRESSED DURING: 13 growth stages; BEST Arabidopsis thaliana protein match is: unknown protein (TAIR:AT1G74160.1)	Domain of unknown function DUF4378	NO
AT1G18960	3.81414	-2.32702	0.000648043	0.0116161	UP	myb-like HTH transcriptional regulator family protein	myb-like HTH transcriptional regulator family protein; FUNCTIONS IN: DNA binding, sequence-specific DNA binding transcription factor activity; INVOLVED IN: regulation of transcription, DNA-dependent, regulation of transcription; CONTAINS InterPro DOMAIN/s: SANT, DNA-binding (InterPro:IPR001005), Homeodomain-like (InterPro:IPR009057), Myb, DNA-binding (InterPro:IPR014778), HTH transcriptional regu…	Homeodomain-like | Myb domain | SANT/Myb domain	NO
AT1G18990	-2.15808	0.434746	0.00118629	0.0188736	DOWN	Protein of unknown function, DUF593	Protein of unknown function, DUF593; FUNCTIONS IN: molecular_function unknown; INVOLVED IN: biological_process unknown; LOCATED IN: endomembrane system; EXPRESSED IN: 9 plant structures; EXPRESSED DURING: L mature pollen stage, M germinated pollen stage, 4 anthesis, C globular stage, petal differentiation and expansion stage; CONTAINS InterPro DOMAIN/s: Protein of unknown function DUF593 (InterPr…	Zein-binding domain	NO
AT1G19020	-1.62899	1.95423	6.57491e-05	0.00176173	DOWN		unknown protein; BEST Arabidopsis thaliana protein match is: unknown protein (TAIR:AT3G48180.1)		NO
AT1G19230	1.65737	2.88537	1.36448e-05	0.000478221	UP	Riboflavin synthase-like superfamily protein	Riboflavin synthase-like superfamily protein; FUNCTIONS IN: in 6 functions; FUNCTIONS IN: in 7 functions; INVOLVED IN: defense response; LOCATED IN: integral to membrane, membrane; EXPRESSED IN: 7 plant structures; EXPRESSED DURING: petal differentiation and expansion stage; CONTAINS InterPro DOMAIN/s: Ferredoxin reductase-type FAD-binding domain (InterPro:IPR017927), Cytochrome b245, heavy chain…		NO
AT1G19415	-1.68906	-0.526767	0.000865214	0.0146512	DOWN	transposable element gene	copia-like retrotransposon family, has a 6.1e-43 P-value blast match to gb|AAO73529.1| gag-pol polyprotein (Glycine max) (SIRE1) (Ty1_Copia-family)		NO
AT1G19420	-3.3479	-1.97862	0.000654736	0.0117112	DOWN		pseudogene, CHP-rich zinc finger protein		NO
AT1G19450	1.15015	5.09583	2.77452e-07	1.66575e-05	UP	Major facilitator superfamily protein	Major facilitator superfamily protein; FUNCTIONS IN: carbohydrate transmembrane transporter activity, sugar:hydrogen symporter activity; INVOLVED IN: transport, transmembrane transport; LOCATED IN: plasma membrane, vacuole, membrane; EXPRESSED IN: 25 plant structures; EXPRESSED DURING: 15 growth stages; CONTAINS InterPro DOMAIN/s: Sugar transporter, conserved site (InterPro:IPR005829), Major faci…	General substrate transporter | Major facilitator superfamily domain | Major facilitator superfamily domain, general substrate transporter | Sugar transporter, conserved site | Sugar/inositol transporter	NO
AT1G19530	1.275	5.71092	4.90999e-05	0.00138852	UP		unknown protein; FUNCTIONS IN: molecular_function unknown; INVOLVED IN: N-terminal protein myristoylation, anaerobic respiration; LOCATED IN: cellular_component unknown; EXPRESSED IN: leaf apex, inflorescence meristem, hypocotyl, root, flower; EXPRESSED DURING: petal differentiation and expansion stage		NO
AT1G19700	2.65169	6.77361	7.33154e-22	6.67388e-19	UP	BEL1-like homeodomain 10	BEL1-like homeodomain 10 (BEL10); FUNCTIONS IN: DNA binding, sequence-specific DNA binding transcription factor activity; INVOLVED IN: regulation of transcription, DNA-dependent, regulation of transcription; LOCATED IN: nucleus; EXPRESSED IN: 20 plant structures; EXPRESSED DURING: 11 growth stages; CONTAINS InterPro DOMAIN/s: Homeobox (InterPro:IPR001356), Homeodomain-like (InterPro:IPR009057), P…	Homeobox KN domain | Homeobox domain | Homeodomain-like | POX domain	NO
AT1G19770	-0.805538	6.53891	0.0014092	0.0216529	DOWN	purine permease 14	purine permease 14 (PUP14); CONTAINS InterPro DOMAIN/s: Protein of unknown function DUF250 (InterPro:IPR004853); BEST Arabidopsis thaliana protein match is: purine permease 15 (TAIR:AT1G75470.1)	Triose-phosphate transporter domain	NO
AT1G19860	1.32386	4.8386	4.32284e-09	4.06697e-07	UP	Zinc finger C-x8-C-x5-C-x3-H type family protein	Zinc finger C-x8-C-x5-C-x3-H type family protein; FUNCTIONS IN: zinc ion binding, nucleic acid binding; INVOLVED IN: biological_process unknown; EXPRESSED IN: 23 plant structures; EXPRESSED DURING: 13 growth stages; CONTAINS InterPro DOMAIN/s: Zinc finger, CCCH-type (InterPro:IPR000571); BEST Arabidopsis thaliana protein match is: Zinc finger C-x8-C-x5-C-x3-H type family protein (TAIR:AT5G66270.1)	Zinc finger, CCCH-type	NO
AT1G20015	3.94887	1.14693	1.25035e-13	3.26457e-11	UP	snoRNA	snoRNA		NO
AT1G20070	2.80066	3.7797	1.39475e-14	4.34969e-12	UP		unknown protein; FUNCTIONS IN: molecular_function unknown; INVOLVED IN: biological_process unknown; LOCATED IN: chloroplast; EXPRESSED IN: 20 plant structures; EXPRESSED DURING: 11 growth stages		NO
AT1G20160	1.70612	5.66512	5.66629e-11	8.18571e-09	UP	Subtilisin-like serine endopeptidase family protein	ATSBT5.2; FUNCTIONS IN: identical protein binding, serine-type endopeptidase activity; INVOLVED IN: proteolysis, negative regulation of catalytic activity; LOCATED IN: apoplast; EXPRESSED IN: 24 plant structures; EXPRESSED DURING: 12 growth stages; CONTAINS InterPro DOMAIN/s: Protease-associated PA (InterPro:IPR003137), Peptidase S8/S53, subtilisin/kexin/sedolisin (InterPro:IPR000209), Peptidase …	Peptidase S8, subtilisin, His-active site | Peptidase S8, subtilisin, Ser-active site | Peptidase S8, subtilisin-related | Peptidase S8/S53 domain | Protease-associated domain, PA | Proteinase inhibitor I9	NO
AT1G20180	3.18422	-1.84299	0.000297834	0.00616175	UP	Protein of unknown function (DUF677)	Protein of unknown function (DUF677); FUNCTIONS IN: molecular_function unknown; INVOLVED IN: biological_process unknown; EXPRESSED IN: 8 plant structures; EXPRESSED DURING: 4 anthesis, C globular stage, petal differentiation and expansion stage; CONTAINS InterPro DOMAIN/s: Protein of unknown function DUF677 (InterPro:IPR007749); BEST Arabidopsis thaliana protein match is: Protein of unknown funct…	Protein of unknown function DUF677	NO
AT1G20390	1.01217	6.88011	1.46062e-05	0.000507167	UP	transposable element gene	gypsy-like retrotransposon family, has a 1.5e-251 P-value blast match to GB:AAD19359 polyprotein (gypsy_Ty3-element) (Sorghum bicolor)		NO
AT1G20610	1.63279	4.65798	7.27277e-10	8.27548e-08	UP	Cyclin B2;3	Cyclin B2;3 (CYCB2;3); FUNCTIONS IN: cyclin-dependent protein kinase regulator activity; INVOLVED IN: regulation of cell cycle; LOCATED IN: nucleus; CONTAINS InterPro DOMAIN/s: Cyclin, C-terminal (InterPro:IPR004367), Cyclin-like (InterPro:IPR011028), Cyclin-related (InterPro:IPR013763), Cyclin, N-terminal (InterPro:IPR006671), Cyclin, A/B/D/E (InterPro:IPR014400), Cyclin (InterPro:IPR006670); BE…	Cyclin A/B/D/E/F | Cyclin, C-terminal domain | Cyclin, N-terminal | Cyclin-like	NO
AT1G20630	-0.905981	5.94337	0.000514042	0.00957983	DOWN	catalase 1	catalase 1 (CAT1); FUNCTIONS IN: catalase activity, cobalt ion binding; INVOLVED IN: in 7 processes; LOCATED IN: mitochondrion, cytosolic ribosome, cell wall, peroxisome, chloroplast envelope; EXPRESSED IN: 26 plant structures; EXPRESSED DURING: 16 growth stages; CONTAINS InterPro DOMAIN/s: Catalase related subgroup (InterPro:IPR018028), Catalase (InterPro:IPR002226), Catalase-like domain, haem-d…	Catalase active site | Catalase core domain | Catalase haem-binding site | Catalase immune-responsive domain | Catalase, mono-functional, haem-containing | Catalase, mono-functional, haem-containing, clades 1 and 3 | Catalase-like domain	NO
AT1G20680	-2.9287	-1.67138	0.0010622	0.0173501	DOWN	Protein of unknown function (DUF833)	Protein of unknown function (DUF833); FUNCTIONS IN: molecular_function unknown; BEST Arabidopsis thaliana protein match is: Protein of unknown function (DUF833) (TAIR:AT1G20740.1); INVOLVED IN: biological_process unknown; CONTAINS InterPro DOMAIN/s: Protein of unknown function DUF833 (InterPro:IPR008551); BEST Arabidopsis thaliana protein match is: Protein of unknown function (DUF833) (TAIR:AT1G2…	Protein of unknown function DUF833	NO
AT1G21060	1.56557	5.60186	5.01613e-07	2.78333e-05	UP	Protein of unknown function, DUF547	Protein of unknown function, DUF547; CONTAINS InterPro DOMAIN/s: Protein of unknown function DUF547 (InterPro:IPR006869); FUNCTIONS IN: molecular_function unknown; BEST Arabidopsis thaliana protein match is: Protein of unknown function, DUF547 (TAIR:AT1G76620.1); INVOLVED IN: biological_process unknown; LOCATED IN: chloroplast; EXPRESSED IN: 16 plant structures; EXPRESSED DURING: 8 growth stages	Domain of unknown function DUF547 | Ternary complex factor MIP1, leucine-zipper	NO
AT1G21100	-3.08863	4.51652	1.62203e-15	5.81188e-13	DOWN	O-methyltransferase family protein	O-methyltransferase family protein; FUNCTIONS IN: methyltransferase activity, O-methyltransferase activity, protein dimerization activity; LOCATED IN: cytosol; EXPRESSED IN: stem, cotyledon, hypocotyl, root, leaf; EXPRESSED DURING: LP.04 four leaves visible; CONTAINS InterPro DOMAIN/s: Winged helix-turn-helix transcription repressor DNA-binding (InterPro:IPR011991), Plant methyltransferase dimeri…	Caffeate O-methyltransferase (COMT) family | O-methyltransferase, family 2 | Plant methyltransferase dimerisation | S-adenosyl-L-methionine-dependent methyltransferase-like | Winged helix-turn-helix DNA-binding domain	NO
AT1G21120	-2.04351	-0.27111	0.00195732	0.0283303	DOWN	O-methyltransferase family protein	O-methyltransferase family protein; FUNCTIONS IN: methyltransferase activity, O-methyltransferase activity, protein dimerization activity; LOCATED IN: cytosol; EXPRESSED IN: 9 plant structures; EXPRESSED DURING: LP.04 four leaves visible, LP.10 ten leaves visible, LP.08 eight leaves visible; CONTAINS InterPro DOMAIN/s: Winged helix-turn-helix transcription repressor DNA-binding (InterPro:IPR01199…		NO
AT1G21130	-1.92149	7.7577	4.41695e-08	3.20619e-06	DOWN	O-methyltransferase family protein	O-methyltransferase family protein; FUNCTIONS IN: methyltransferase activity, protein dimerization activity, O-methyltransferase activity; LOCATED IN: cytosol; EXPRESSED IN: 15 plant structures; EXPRESSED DURING: 9 growth stages; CONTAINS InterPro DOMAIN/s: Winged helix-turn-helix transcription repressor DNA-binding (InterPro:IPR011991), Plant methyltransferase dimerisation (InterPro:IPR012967), …	Caffeate O-methyltransferase (COMT) family | O-methyltransferase, family 2 | Plant methyltransferase dimerisation | S-adenosyl-L-methionine-dependent methyltransferase-like | Winged helix-turn-helix DNA-binding domain	NO
AT1G21210	2.38629	-0.129795	4.55047e-06	0.000187824	UP	wall associated kinase 4	wall associated kinase 4 (WAK4); FUNCTIONS IN: protein serine/threonine kinase activity, protein kinase activity, ATP binding, calcium ion binding; INVOLVED IN: protein amino acid phosphorylation, unidimensional cell growth, lateral root development; LOCATED IN: plasma membrane; EXPRESSED IN: root, trichome; CONTAINS InterPro DOMAIN/s: EGF-like calcium-binding (InterPro:IPR001881), EGF-like, type…	Concanavalin A-like lectin/glucanase, subgroup | EGF-like calcium-binding domain | EGF-like calcium-binding, conserved site | EGF-type aspartate/asparagine hydroxylation site | Epidermal growth factor-like domain | Protein kinase domain | Protein kinase-like domain | Serine-threonine/tyrosine-protein kinase catalytic domain | Serine/threonine-protein kinase, active site | Wall-associated receptor…	NO
AT1G21270	-1.34085	3.12426	3.19503e-05	0.000971225	DOWN	wall-associated kinase 2	wall-associated kinase 2 (WAK2); FUNCTIONS IN: protein serine/threonine kinase activity, protein kinase activity, calcium ion binding, ATP binding; INVOLVED IN: cellular water homeostasis, protein amino acid phosphorylation, oligosaccharide metabolic process, unidimensional cell growth, response to salicylic acid stimulus; LOCATED IN: plasma membrane; EXPRESSED IN: 18 plant structures; EXPRESSED …	Concanavalin A-like lectin/glucanase, subgroup | EGF-like calcium-binding domain | EGF-like calcium-binding, conserved site | EGF-like, conserved site | EGF-type aspartate/asparagine hydroxylation site | Epidermal growth factor-like domain | Protein kinase domain | Protein kinase-like domain | Serine/threonine-protein kinase, active site | Wall-associated receptor kinase galacturonan-binding doma…	NO
AT1G21310	1.74376	9.46152	1.07737e-05	0.000391866	UP	extensin 3	extensin 3 (EXT3); FUNCTIONS IN: structural constituent of cell wall; INVOLVED IN: plant-type cell wall organization; LOCATED IN: endomembrane system; EXPRESSED IN: 7 plant structures; EXPRESSED DURING: 4 anthesis, F mature embryo stage, petal differentiation and expansion stage, E expanded cotyledon stage, D bilateral stage; CONTAINS InterPro DOMAIN/s: Extensin-like repeat (InterPro:IPR006706); …		NO
AT1G21326	-1.86357	0.474503	0.000824021	0.0140668	DOWN	VQ motif-containing protein	VQ motif-containing protein; CONTAINS InterPro DOMAIN/s: VQ (InterPro:IPR008889); BEST Arabidopsis thaliana protein match is: nucleotide binding;nucleic acid binding (TAIR:AT1G21320.1)	VQ	NO
AT1G21360	1.30513	3.93339	1.87842e-05	0.00062765	UP	glycolipid transfer protein 2	glycolipid transfer protein 2 (GLTP2); FUNCTIONS IN: glycolipid transporter activity, glycolipid binding; INVOLVED IN: glycolipid transport; LOCATED IN: cytoplasm; CONTAINS InterPro DOMAIN/s: Glycolipid transfer protein, GLTP (InterPro:IPR014830); BEST Arabidopsis thaliana protein match is: Glycolipid transfer protein (GLTP) family protein (TAIR:AT3G21260.3)	Glycolipid transfer protein domain	NO
AT1G21550	-2.07436	0.684651	0.00110253	0.0178616	DOWN	Calcium-binding EF-hand family protein	Calcium-binding EF-hand family protein; FUNCTIONS IN: calcium ion binding; INVOLVED IN: biological_process unknown; LOCATED IN: cellular_component unknown; EXPRESSED IN: 14 plant structures; EXPRESSED DURING: 8 growth stages; CONTAINS InterPro DOMAIN/s: EF-Hand 1, calcium-binding site (InterPro:IPR018247), EF-HAND 2 (InterPro:IPR018249), EF-hand-like domain (InterPro:IPR011992), Calcium-binding E…	EF-Hand 1, calcium-binding site | EF-hand domain | EF-hand domain pair	NO
AT1G21670	-0.856495	5.66831	0.000695813	0.0122764	DOWN		LOCATED IN: cell wall, plant-type cell wall; EXPRESSED IN: 23 plant structures; EXPRESSED DURING: 14 growth stages; CONTAINS InterPro DOMAIN/s: WD40-like Beta Propeller (InterPro:IPR011659), Six-bladed beta-propeller, TolB-like (InterPro:IPR011042); BEST Arabidopsis thaliana protein match is: DPP6 N-terminal domain-like protein (TAIR:AT1G21680.1)	WD40-like Beta Propeller | WD40/YVTN repeat-like-containing domain	NO
AT1G22170	0.809945	3.6623	0.00275161	0.0376735	UP	Phosphoglycerate mutase family protein	Phosphoglycerate mutase family protein; FUNCTIONS IN: intramolecular transferase activity, phosphotransferases, catalytic activity; INVOLVED IN: glycolysis, metabolic process; LOCATED IN: chloroplast; EXPRESSED IN: 19 plant structures; EXPRESSED DURING: 8 growth stages; CONTAINS InterPro DOMAIN/s: Histidine phosphatase superfamily, clade-1 (InterPro:IPR013078), Phosphoglycerate/bisphosphoglycerat…	Histidine phosphatase superfamily | Histidine phosphatase superfamily, clade-1 | Phosphoglycerate mutase 1 | Phosphoglycerate/bisphosphoglycerate mutase, active site	NO
AT1G22310	-0.783261	4.2152	0.001807	0.0264385	DOWN	methyl-CPG-binding domain 8	methyl-CPG-binding domain 8 (MBD8); FUNCTIONS IN: methyl-CpG binding; INVOLVED IN: biological_process unknown; LOCATED IN: nucleus; EXPRESSED IN: 23 plant structures; EXPRESSED DURING: 13 growth stages; CONTAINS InterPro DOMAIN/s: A.T hook-like (InterPro:IPR020478), AT hook, DNA-binding motif (InterPro:IPR017956), DNA-binding, integrase-type (InterPro:IPR016177), Methyl-CpG DNA binding (InterPro:…	AT hook, DNA-binding motif | DNA-binding domain | Methyl-CpG DNA binding	NO
AT1G22370	-1.37978	4.88892	6.59387e-05	0.0017626	DOWN	UDP-glucosyl transferase 85A5	UDP-glucosyl transferase 85A5 (UGT85A5); FUNCTIONS IN: transferase activity, transferring glycosyl groups, glucuronosyltransferase activity; INVOLVED IN: metabolic process; EXPRESSED IN: 15 plant structures; EXPRESSED DURING: 9 growth stages; CONTAINS InterPro DOMAIN/s: UDP-glucuronosyl/UDP-glucosyltransferase (InterPro:IPR002213); BEST Arabidopsis thaliana protein match is: UDP-glucosyl transfer…	UDP-glucuronosyl/UDP-glucosyltransferase	NO
AT1G22440	1.07146	4.56587	0.000359931	0.00720312	UP	Zinc-binding alcohol dehydrogenase family protein	Zinc-binding alcohol dehydrogenase family protein; FUNCTIONS IN: oxidoreductase activity, zinc ion binding; INVOLVED IN: oxidation reduction; LOCATED IN: cellular_component unknown; EXPRESSED IN: hypocotyl, root; CONTAINS InterPro DOMAIN/s: GroES-like (InterPro:IPR011032), Alcohol dehydrogenase GroES-like (InterPro:IPR013154), Alcohol dehydrogenase, zinc-containing, conserved site (InterPro:IPR00…	Alcohol dehydrogenase GroES-like | Alcohol dehydrogenase superfamily, zinc-type | Alcohol dehydrogenase, C-terminal | Alcohol dehydrogenase, zinc-type, conserved site | GroES (chaperonin 10)-like | NAD(P)-binding domain	YES	1:7924615:A-AT;intronic_variant
AT1G22470	1.98525	-0.226054	0.000157078	0.00363363	UP		unknown protein; BEST Arabidopsis thaliana protein match is: unknown protein (TAIR:AT1G72240.1)		NO
AT1G22570	-1.13797	3.83851	0.00283749	0.0386764	DOWN	Major facilitator superfamily protein	Major facilitator superfamily protein; FUNCTIONS IN: transporter activity; INVOLVED IN: oligopeptide transport; LOCATED IN: membrane; EXPRESSED IN: 17 plant structures; EXPRESSED DURING: 10 growth stages; CONTAINS InterPro DOMAIN/s: PTR2 family proton/oligopeptide symporter, conserved site (InterPro:IPR018456), Oligopeptide transporter (InterPro:IPR000109), Major facilitator superfamily, general …	Major facilitator superfamily domain, general substrate transporter | PTR2 family proton/oligopeptide symporter, conserved site | Proton-dependent oligopeptide transporter family	NO
AT1G22630	0.871428	6.50398	0.00053771	0.00995088	UP		unknown protein; LOCATED IN: chloroplast; EXPRESSED IN: 21 plant structures; EXPRESSED DURING: 13 growth stages	Heat shock protein DnaJ, cysteine-rich domain	NO
AT1G23000	0.825902	4.24422	0.00115525	0.0185266	UP	Heavy metal transport/detoxification superfamily protein	Heavy metal transport/detoxification superfamily protein ; FUNCTIONS IN: metal ion binding; INVOLVED IN: metal ion transport; LOCATED IN: cellular_component unknown; EXPRESSED IN: 12 plant structures; EXPRESSED DURING: 6 growth stages; CONTAINS InterPro DOMAIN/s: Heavy metal transport/detoxification protein (InterPro:IPR006121); BEST Arabidopsis thaliana protein match is: Heavy metal transport/de…	Heavy metal-associated domain, HMA	NO
AT1G23020	1.39417	7.697	0.000211205	0.00463426	UP	ferric reduction oxidase 3	ferric reduction oxidase 3 (FRO3); FUNCTIONS IN: ferric-chelate reductase activity; INVOLVED IN: oxidation reduction; LOCATED IN: integral to membrane, membrane; EXPRESSED IN: 18 plant structures; EXPRESSED DURING: 9 growth stages; CONTAINS InterPro DOMAIN/s: Ferredoxin reductase-type FAD-binding domain (InterPro:IPR017927), Ferric reductase, NAD binding (InterPro:IPR013121), FAD-binding 8 (Inter…	FAD-binding 8 | Ferredoxin reductase-type FAD-binding domain | Ferric reductase transmembrane component-like domain | Ferric reductase, NAD binding	NO
AT1G23052	-1.17563	4.78076	4.3509e-06	0.000180471	DOWN				NO
AT1G23205	1.34245	2.31865	0.00151894	0.0230034	UP	Plant invertase/pectin methylesterase inhibitor superfamily protein	Plant invertase/pectin methylesterase inhibitor superfamily protein; FUNCTIONS IN: enzyme inhibitor activity, pectinesterase inhibitor activity, pectinesterase activity; INVOLVED IN: biological_process unknown; LOCATED IN: endomembrane system; EXPRESSED IN: 18 plant structures; EXPRESSED DURING: 13 growth stages; CONTAINS InterPro DOMAIN/s: Pectinesterase inhibitor (InterPro:IPR006501); BEST Arab…	Pectinesterase inhibitor domain	NO
AT1G23330	0.729186	4.32961	0.00375165	0.0479178	UP	alpha/beta-Hydrolases superfamily protein	alpha/beta-Hydrolases superfamily protein; FUNCTIONS IN: molecular_function unknown; INVOLVED IN: biological_process unknown; LOCATED IN: endomembrane system; EXPRESSED IN: 22 plant structures; EXPRESSED DURING: 13 growth stages; BEST Arabidopsis thaliana protein match is: alpha/beta-Hydrolases superfamily protein (TAIR:AT1G10740.4)	Alpha/Beta hydrolase fold	NO
AT1G23560	1.70633	2.3535	7.81603e-07	4.11778e-05	UP	Domain of unknown function (DUF220)	Domain of unknown function (DUF220); CONTAINS InterPro DOMAIN/s: Protein of unknown function DUF220 (InterPro:IPR003863); BEST Arabidopsis thaliana protein match is: Domain of unknown function (DUF220) (TAIR:AT1G70480.2)	Protein of unknown function DUF220	NO
AT1G23720	1.72748	5.81058	7.73642e-10	8.65683e-08	UP	Proline-rich extensin-like family protein	Proline-rich extensin-like family protein; FUNCTIONS IN: structural constituent of cell wall; INVOLVED IN: plant-type cell wall organization; EXPRESSED IN: hypocotyl, root, carpel; EXPRESSED DURING: petal differentiation and expansion stage; CONTAINS InterPro DOMAIN/s: Extensin-like repeat (InterPro:IPR006706); BEST Arabidopsis thaliana protein match is: Proline-rich extensin-like family protein …	Extensin domain	NO
AT1G23840	-1.68698	0.239599	0.000442776	0.00848784	DOWN		unknown protein; LOCATED IN: endomembrane system; EXPRESSED IN: 18 plant structures; EXPRESSED DURING: 12 growth stages; BEST Arabidopsis thaliana protein match is: unknown protein (TAIR:AT1G23850.1)		NO
AT1G24330	3.05006	4.21132	1.94083e-15	6.80929e-13	UP	ARM repeat superfamily protein	ARM repeat superfamily protein; FUNCTIONS IN: ubiquitin-protein ligase activity, binding; INVOLVED IN: protein ubiquitination; LOCATED IN: chloroplast; EXPRESSED IN: 23 plant structures; EXPRESSED DURING: 15 growth stages; CONTAINS InterPro DOMAIN/s: U box domain (InterPro:IPR003613), Armadillo-like helical (InterPro:IPR011989), Armadillo (InterPro:IPR000225), Armadillo-type fold (InterPro:IPR016…	Armadillo | Armadillo-like helical | Armadillo-type fold | U box domain | Zinc finger, RING/FYVE/PHD-type	NO
AT1G24370	3.73429	-2.37429	0.00108247	0.0176054	UP	transposable element gene	similar to unknown protein [Arabidopsis thaliana] (TAIR:AT3G15310.1); similar to Os01g0180200 [Oryza sativa (japonica cultivar-group)] (GB:NP_001042205.1); similar to unknown protein [Oryza sativa (japonica cultivar-group)] (GB:AAT93896.1); similar to ribosomal protein-like [Oryza sativa (japonica cultivar-group)] (GB:BAD23759.1); contains InterPro domain Protein of unknown function DUF635; (Inte…	Harbinger transposase-derived protein, plant | Protein of unknown function DUF626, Arabidopsis thaliana	NO
AT1G24430	2.09945	1.44673	9.92079e-07	5.07044e-05	UP	HXXXD-type acyl-transferase family protein	HXXXD-type acyl-transferase family protein; FUNCTIONS IN: transferase activity, transferring acyl groups other than amino-acyl groups, transferase activity; INVOLVED IN: N-terminal protein myristoylation; LOCATED IN: cellular_component unknown; EXPRESSED IN: hypocotyl, root; CONTAINS InterPro DOMAIN/s: Transferase (InterPro:IPR003480); BEST Arabidopsis thaliana protein match is: HXXXD-type acyl-t…	Chloramphenicol acetyltransferase-like domain | Transferase	NO
AT1G24575	-1.22858	1.58788	0.000951327	0.0158387	DOWN		unknown protein		NO
AT1G24610	-0.740862	4.79263	0.00125804	0.0198052	DOWN	Rubisco methyltransferase family protein	Rubisco methyltransferase family protein; FUNCTIONS IN: molecular_function unknown; INVOLVED IN: biological_process unknown; LOCATED IN: chloroplast; EXPRESSED IN: 23 plant structures; EXPRESSED DURING: 15 growth stages; CONTAINS InterPro DOMAIN/s: SET domain (InterPro:IPR001214), Rubisco LSMT substrate-binding (InterPro:IPR015353); BEST Arabidopsis thaliana protein match is: plastid transcriptio…	Rubisco LSMT, substrate-binding domain | SET domain	NO
AT1G25210	3.72059	-1.25863	0.000590064	0.0107776	UP	UDP-3-O-acyl N-acetylglycosamine deacetylase family protein	UDP-3-O-acyl N-acetylglycosamine deacetylase family protein; FUNCTIONS IN: UDP-3-O-[3-hydroxymyristoyl] N-acetylglucosamine deacetylase activity; INVOLVED IN: lipid A biosynthetic process; CONTAINS InterPro DOMAIN/s: UDP-3-O-acyl N-acetylglucosamine deacetylase, N-terminal (InterPro:IPR015870), Ribosomal protein S5 domain 2-type fold (InterPro:IPR020568), UDP-3-O-acyl N-acetylglucosamine deacetyl…	Ribosomal protein S5 domain 2-type fold | UDP-3-O-acyl N-acetylglucosamine deacetylase | UDP-3-O-acyl N-acetylglucosamine deacetylase, C-terminal | UDP-3-O-acyl N-acetylglucosamine deacetylase, N-terminal	NO
AT1G25430	5.69458	-2.34059	0.000197334	0.00438996	UP	transposable element gene	non-LTR retrotransposon family (LINE), has a 8.0e-45 P-value blast match to GB:NP_038607 L1 repeat, Tf subfamily, member 9 (LINE-element) (Mus musculus)	Endonuclease/exonuclease/phosphatase | Reverse transcriptase domain | Reverse transcriptase zinc-binding domain	NO
AT1G26208	1.16527	4.82238	8.50651e-07	4.4146e-05	UP	other RNA			NO
AT1G26360	1.81111	-0.357747	0.00273434	0.0375134	UP	methyl esterase 13	methyl esterase 13 (MES13); FUNCTIONS IN: hydrolase activity; INVOLVED IN: N-terminal protein myristoylation; LOCATED IN: chloroplast; EXPRESSED IN: pollen tube; CONTAINS InterPro DOMAIN/s: Alpha/beta hydrolase fold-1 (InterPro:IPR000073); BEST Arabidopsis thaliana protein match is: methyl esterase 15 (TAIR:AT1G69240.1)	Alpha/Beta hydrolase fold	NO
AT1G26410	-3.70071	-2.2897	0.00148263	0.0225447	DOWN	FAD-binding Berberine family protein	FAD-binding Berberine family protein; FUNCTIONS IN: electron carrier activity, oxidoreductase activity, FAD binding, catalytic activity; LOCATED IN: cellular_component unknown; CONTAINS InterPro DOMAIN/s: FAD-binding, type 2 (InterPro:IPR016166), Berberine/berberine-like (InterPro:IPR012951), FAD linked oxidase, N-terminal (InterPro:IPR006094); BEST Arabidopsis thaliana protein match is: FAD-bind…	Berberine/berberine-like | CO dehydrogenase flavoprotein-like, FAD-binding, subdomain 2 | FAD linked oxidase, N-terminal | FAD-binding, type 2 | FAD-binding, type 2, subdomain 1	NO
AT1G26680	1.55183	0.905338	0.000954186	0.0158784	UP	transcriptional factor B3 family protein	transcriptional factor B3 family protein; FUNCTIONS IN: DNA binding, sequence-specific DNA binding transcription factor activity; INVOLVED IN: regulation of transcription, DNA-dependent; LOCATED IN: chloroplast; EXPRESSED IN: ovule, embryo; EXPRESSED DURING: D bilateral stage; CONTAINS InterPro DOMAIN/s: Transcriptional factor B3 (InterPro:IPR003340); BEST Arabidopsis thaliana protein match is: T…	B3 DNA binding domain | DNA-binding pseudobarrel domain	NO
AT1G26700	2.06044	-0.756667	0.0014289	0.0219057	UP	Seven transmembrane MLO family protein	MILDEW RESISTANCE LOCUS O 14 (MLO14); FUNCTIONS IN: calmodulin binding; INVOLVED IN: cell death, defense response; LOCATED IN: integral to membrane, plasma membrane; EXPRESSED IN: 12 plant structures; EXPRESSED DURING: 4 anthesis, LP.10 ten leaves visible, F mature embryo stage, 4 leaf senescence stage, LP.08 eight leaves visible; CONTAINS InterPro DOMAIN/s: Mlo-related protein (InterPro:IPR00432…	Mlo-related protein	NO
AT1G26730	2.29011	2.56276	9.3482e-12	1.63138e-09	UP	EXS (ERD1/XPR1/SYG1) family protein	EXS (ERD1/XPR1/SYG1) family protein; LOCATED IN: integral to membrane, plasma membrane; EXPRESSED IN: 22 plant structures; EXPRESSED DURING: 13 growth stages; CONTAINS InterPro DOMAIN/s: EXS, C-terminal (InterPro:IPR004342), SPX, N-terminal (InterPro:IPR004331); BEST Arabidopsis thaliana protein match is: EXS (ERD1/XPR1/SYG1) family protein (TAIR:AT1G35350.1)	EXS, C-terminal | SPX, N-terminal	NO
AT1G26820	1.2225	2.22961	0.000489466	0.00920474	UP	ribonuclease 3	ribonuclease 3 (RNS3); FUNCTIONS IN: ribonuclease T2 activity, endoribonuclease activity, RNA binding; INVOLVED IN: aging; LOCATED IN: endomembrane system; EXPRESSED IN: 21 plant structures; EXPRESSED DURING: 12 growth stages; CONTAINS InterPro DOMAIN/s: Ribonuclease T2 (InterPro:IPR001568), Ribonuclease T2, active site (InterPro:IPR018188); BEST Arabidopsis thaliana protein match is: Ribonucleas…	Ribonuclease T2, active site | Ribonuclease T2-like	NO
AT1G26870	2.39343	-1.48592	0.000927997	0.0155104	UP	NAC (No Apical Meristem) domain transcriptional regulator superfamily protein	FEZ (FEZ); CONTAINS InterPro DOMAIN/s: No apical meristem (NAM) protein (InterPro:IPR003441); BEST Arabidopsis thaliana protein match is: NAC domain containing protein 94 (TAIR:AT5G39820.1)		NO
AT1G26970	2.51266	0.943339	1.05825e-07	6.98878e-06	UP	Protein kinase superfamily protein	Protein kinase superfamily protein; FUNCTIONS IN: protein serine/threonine kinase activity, protein kinase activity, kinase activity, ATP binding; INVOLVED IN: protein amino acid phosphorylation, N-terminal protein myristoylation; LOCATED IN: chloroplast; CONTAINS InterPro DOMAIN/s: Protein kinase, ATP binding site (InterPro:IPR017441), Protein kinase, catalytic domain (InterPro:IPR000719), Serin…	Concanavalin A-like lectin/glucanase, subgroup | Protein kinase domain | Protein kinase, ATP binding site | Protein kinase-like domain | Serine-threonine/tyrosine-protein kinase catalytic domain | Serine/threonine-protein kinase, active site	NO
AT1G26975	5.06078	-2.70886	0.00252921	0.0350417	UP	MIR395B; miRNA			NO
AT1G26976	5.50352	-2.47459	0.000243162	0.00521651	UP		unknown protein; FUNCTIONS IN: molecular_function unknown; INVOLVED IN: biological_process unknown; LOCATED IN: cellular_component unknown		NO
AT1G27140	1.75076	0.290289	0.0011992	0.019034	UP	glutathione S-transferase tau 14	glutathione S-transferase tau 14 (GSTU14); CONTAINS InterPro DOMAIN/s: Thioredoxin fold (InterPro:IPR012335), Glutathione S-transferase, C-terminal (InterPro:IPR004046), Glutathione S-transferase, C-terminal-like (InterPro:IPR010987), Glutathione S-transferase/chloride channel, C-terminal (InterPro:IPR017933), Glutathione S-transferase, N-terminal (InterPro:IPR004045), Thioredoxin-like fold (Inte…	Glutathione S-transferase, C-terminal | Glutathione S-transferase, C-terminal-like | Glutathione S-transferase, N-terminal | Thioredoxin-like fold	NO
AT1G27360	1.07772	3.67643	0.0017681	0.025937	UP	squamosa promoter-like 11	squamosa promoter-like 11 (SPL11); FUNCTIONS IN: DNA binding, sequence-specific DNA binding transcription factor activity; INVOLVED IN: regulation of transcription, regulation of timing of transition from vegetative to reproductive phase; LOCATED IN: nucleus; EXPRESSED IN: 21 plant structures; EXPRESSED DURING: 10 growth stages; CONTAINS InterPro DOMAIN/s: Transcription factor, SBP-box (InterPro:…	Transcription factor, SBP-box	NO
AT1G27370	0.869272	4.64519	0.00047962	0.00904991	UP	squamosa promoter binding protein-like 10	squamosa promoter binding protein-like 10 (SPL10); FUNCTIONS IN: DNA binding, transcription activator activity, sequence-specific DNA binding transcription factor activity; INVOLVED IN: leaf shaping, regulation of transcription, regulation of timing of transition from vegetative to reproductive phase; LOCATED IN: nucleus; EXPRESSED IN: 24 plant structures; EXPRESSED DURING: 13 growth stages; CONT…	Transcription factor, SBP-box	NO
AT1G27520	-0.856336	5.73695	0.000124803	0.00300036	DOWN	Glycosyl hydrolase family 47 protein	Glycosyl hydrolase family 47 protein; FUNCTIONS IN: mannosyl-oligosaccharide 1,2-alpha-mannosidase activity, alpha-mannosidase activity, calcium ion binding; INVOLVED IN: protein amino acid N-linked glycosylation; LOCATED IN: endomembrane system, membrane; EXPRESSED IN: 22 plant structures; EXPRESSED DURING: 13 growth stages; CONTAINS InterPro DOMAIN/s: Glycoside hydrolase, family 47 (InterPro:IP…	Glycoside hydrolase, family 47	NO
AT1G27740	2.12752	1.33671	0.000218534	0.00477232	UP	root hair defective 6-like 4	root hair defective 6-like 4 (RSL4); FUNCTIONS IN: DNA binding, sequence-specific DNA binding transcription factor activity; INVOLVED IN: root hair initiation, response to auxin stimulus, positive regulation of transcription, cell growth, regulation of transcription; LOCATED IN: nucleus; EXPRESSED IN: trichoblast, root; EXPRESSED DURING: 5 root hair formation; CONTAINS InterPro DOMAIN/s: Helix-lo…	Myc-type, basic helix-loop-helix (bHLH) domain	NO
AT1G27910	0.86203	4.46553	0.000373159	0.00740171	UP	plant U-box 45	plant U-box 45 (PUB45); FUNCTIONS IN: ubiquitin-protein ligase activity; INVOLVED IN: protein ubiquitination; LOCATED IN: ubiquitin ligase complex; EXPRESSED IN: 18 plant structures; EXPRESSED DURING: 11 growth stages; CONTAINS InterPro DOMAIN/s: U box domain (InterPro:IPR003613), Armadillo-like helical (InterPro:IPR011989), Armadillo (InterPro:IPR000225), Armadillo-type fold (InterPro:IPR016024)…	Armadillo | Armadillo-like helical | Armadillo-type fold | U box domain | Zinc finger, RING/FYVE/PHD-type	NO
AT1G28290	1.4557	7.95825	7.13798e-06	0.000276975	UP	arabinogalactan protein 31	arabinogalactan protein 31 (AGP31); CONTAINS InterPro DOMAIN/s: Pollen Ole e 1 allergen/extensin (InterPro:IPR006041); BEST Arabidopsis thaliana protein match is: arabinogalactan protein 30 (TAIR:AT2G33790.1)	Immunoglobulin-like fold | Pollen Ole e 1 allergen/extensin	NO
AT1G28370	2.13627	3.75883	1.24483e-08	1.02053e-06	UP	ERF domain protein 11	ERF domain protein 11 (ERF11); CONTAINS InterPro DOMAIN/s: DNA-binding, integrase-type (InterPro:IPR016177), Pathogenesis-related transcriptional factor/ERF, DNA-binding (InterPro:IPR001471); BEST Arabidopsis thaliana protein match is: ethylene responsive element binding factor 4 (TAIR:AT3G15210.1)		NO
AT1G28380	-0.775548	5.29186	0.00227307	0.0321003	DOWN	MAC/Perforin domain-containing protein	necrotic spotted lesions 1 (NSL1); CONTAINS InterPro DOMAIN/s: Membrane attack complex component/perforin (MACPF) domain (InterPro:IPR020864); BEST Arabidopsis thaliana protein match is: MAC/Perforin domain-containing protein (TAIR:AT4G24290.2)	Membrane attack complex component/perforin (MACPF) domain	NO
AT1G28470	1.33848	1.67988	0.000640331	0.0115063	UP	NAC domain containing protein 10	NAC domain containing protein 10 (NAC010); CONTAINS InterPro DOMAIN/s: No apical meristem (NAM) protein (InterPro:IPR003441); BEST Arabidopsis thaliana protein match is: NAC domain containing protein 73 (TAIR:AT4G28500.1)	NAC domain	YES	1:10010777:G-T;exonic_variant,1:10010777:G-T;intronic_variant
AT1G28520	2.20959	7.70587	1.10705e-15	4.14296e-13	UP	vascular plant one zinc finger protein	vascular plant one zinc finger protein (VOZ1); FUNCTIONS IN: transcription activator activity; INVOLVED IN: biological_process unknown; LOCATED IN: cellular_component unknown; EXPRESSED IN: 22 plant structures; EXPRESSED DURING: 8 growth stages; BEST Arabidopsis thaliana protein match is: vascular plant one zinc finger protein 2 (TAIR:AT2G42400.1)		NO
AT1G28610	-0.856398	3.55136	0.00282668	0.0385688	DOWN	GDSL-like Lipase/Acylhydrolase superfamily protein	GDSL-like Lipase/Acylhydrolase superfamily protein; FUNCTIONS IN: lipase activity, carboxylesterase activity; FUNCTIONS IN: lipase activity, hydrolase activity, acting on ester bonds, carboxylesterase activity; INVOLVED IN: lipid metabolic process; LOCATED IN: endomembrane system; EXPRESSED IN: 22 plant structures; BEST Arabidopsis thaliana protein match is: GDSL-like Lipase/Acylhydrolase superfa…	Lipase, GDSL | SGNH hydrolase-type esterase domain	NO
AT1G28620	-1.4479	1.33033	0.00026638	0.00562857	DOWN		pseudogene, lipase, similar to lipase Arab-1 GB:S68410 GI:2129636 (Arabidopsis thaliana); blastp match of 44% identity and 1.2e-48 P-value to GP|7523500|dbj|BAA94228.1||AP001633 unnamed protein product {Oryza sativa (japonica cultivar-group)}		NO
AT1G29000	3.20275	0.364627	1.18034e-08	9.84033e-07	UP	Heavy metal transport/detoxification superfamily protein	Heavy metal transport/detoxification superfamily protein ; FUNCTIONS IN: metal ion binding; INVOLVED IN: metal ion transport; CONTAINS InterPro DOMAIN/s: Heavy metal transport/detoxification protein (InterPro:IPR006121); BEST Arabidopsis thaliana protein match is: Heavy metal transport/detoxification superfamily protein (TAIR:AT5G50740.1)	Heavy metal-associated domain, HMA	NO
AT1G29025	2.10694	1.93455	8.32881e-08	5.67403e-06	UP	Calcium-binding EF-hand family protein	Calcium-binding EF-hand family protein; FUNCTIONS IN: calcium ion binding; LOCATED IN: endomembrane system; CONTAINS InterPro DOMAIN/s: EF-Hand 1, calcium-binding site (InterPro:IPR018247), EF-HAND 2 (InterPro:IPR018249), Calcium-binding EF-hand (InterPro:IPR002048), EF-hand-like domain (InterPro:IPR011992); BEST Arabidopsis thaliana protein match is: Calcium-binding EF-hand family protein (TAIR:…	EF-Hand 1, calcium-binding site | EF-hand domain | EF-hand domain pair	NO
AT1G29050	1.18391	4.19994	7.17201e-06	0.000277975	UP	TRICHOME BIREFRINGENCE-LIKE 38	TRICHOME BIREFRINGENCE-LIKE 38 (TBL38); INVOLVED IN: biological_process unknown; LOCATED IN: endomembrane system; EXPRESSED IN: 22 plant structures; EXPRESSED DURING: 12 growth stages; CONTAINS InterPro DOMAIN/s: Protein of unknown function DUF231, plant (InterPro:IPR004253); BEST Arabidopsis thaliana protein match is: TRICHOME BIREFRINGENCE-LIKE 37 (TAIR:AT2G34070.1)	PC-Esterase | PMR5 N-terminal domain	NO
AT1G29071	3.38407	-2.07734	0.000417916	0.00810352	UP	SNOR105 (SMALL NUCLEOLAR RNA 105); snoRNA			NO
AT1G29090	-3.31201	1.16535	1.09843e-05	0.000398667	DOWN	Cysteine proteinases superfamily protein	Cysteine proteinases superfamily protein; FUNCTIONS IN: cysteine-type endopeptidase activity, cysteine-type peptidase activity; INVOLVED IN: proteolysis; LOCATED IN: endomembrane system; EXPRESSED IN: sperm cell; CONTAINS InterPro DOMAIN/s: Peptidase C1A, papain (InterPro:IPR013128), Proteinase inhibitor I29, cathepsin propeptide (InterPro:IPR013201), Peptidase C1A, papain C-terminal (InterPro:IP…	Cysteine peptidase, asparagine active site | Cysteine peptidase, cysteine active site | Peptidase C1A | Peptidase C1A, papain C-terminal | Proteinase inhibitor I29, cathepsin propeptide	NO
AT1G29460	1.52474	3.77078	0.00225536	0.0319306	UP	SAUR-like auxin-responsive protein family	SAUR-like auxin-responsive protein family ; FUNCTIONS IN: molecular_function unknown; INVOLVED IN: response to auxin stimulus; LOCATED IN: mitochondrion; EXPRESSED IN: 12 plant structures; EXPRESSED DURING: 9 growth stages; CONTAINS InterPro DOMAIN/s: Auxin responsive SAUR protein (InterPro:IPR003676); BEST Arabidopsis thaliana protein match is: SAUR-like auxin-responsive protein family (TAIR:AT1…		NO
AT1G29560	-1.33168	2.36521	0.000533707	0.00990401	DOWN	Zinc finger C-x8-C-x5-C-x3-H type family protein	Zinc finger C-x8-C-x5-C-x3-H type family protein; FUNCTIONS IN: zinc ion binding, nucleic acid binding; LOCATED IN: cellular_component unknown; CONTAINS InterPro DOMAIN/s: Zinc finger, CCCH-type (InterPro:IPR000571); BEST Arabidopsis thaliana protein match is: Zinc finger C-x8-C-x5-C-x3-H type family protein (TAIR:AT1G29570.1)	Zinc finger, CCCH-type	NO
AT1G29640	1.59451	1.63021	3.35541e-05	0.00101474	UP	Protein of unknown function, DUF584	Protein of unknown function, DUF584; CONTAINS InterPro DOMAIN/s: Protein of unknown function DUF584 (InterPro:IPR007608); BEST Arabidopsis thaliana protein match is: Protein of unknown function, DUF584 (TAIR:AT2G34340.1)	Senescence regulator S40	NO
AT1G29730	-1.84624	1.14155	8.62866e-06	0.000325809	DOWN	Leucine-rich repeat transmembrane protein kinase	Leucine-rich repeat transmembrane protein kinase; FUNCTIONS IN: protein serine/threonine kinase activity, protein kinase activity, kinase activity, ATP binding; INVOLVED IN: protein amino acid phosphorylation; LOCATED IN: endomembrane system; CONTAINS InterPro DOMAIN/s: Protein kinase, ATP binding site (InterPro:IPR017441), Serine/threonine-protein kinase domain (InterPro:IPR002290), Leucine-rich…	Concanavalin A-like lectin/glucanase, subgroup | Leucine-rich repeat | Malectin | Protein kinase domain | Protein kinase, ATP binding site | Protein kinase-like domain | Serine/threonine-protein kinase, active site	NO
AT1G29750	1.10583	5.6026	8.91622e-07	4.59888e-05	UP	receptor-like kinase in flowers 1	receptor-like kinase in flowers 1 (RKF1); FUNCTIONS IN: protein serine/threonine kinase activity, receptor signaling protein serine/threonine kinase activity, kinase activity, ATP binding; INVOLVED IN: transmembrane receptor protein tyrosine kinase signaling pathway, protein amino acid phosphorylation; LOCATED IN: endomembrane system; EXPRESSED IN: 24 plant structures; EXPRESSED DURING: 15 growth…	Concanavalin A-like lectin/glucanase, subgroup | Leucine-rich repeat | Malectin | Protein kinase domain | Protein kinase, ATP binding site | Protein kinase-like domain | Serine-threonine/tyrosine-protein kinase catalytic domain | Serine/threonine-protein kinase, active site	YES	1:10417329:C-T;intronic_variant,1:10417499:TA-T;intronic_variant,1:10417343:G-GT;intronic_variant,1:10417334:G-A;intronic_variant,1:10417305:C-CA;intronic_variant,1:10417330:G-C;intronic_variant
AT1G30050	2.43049	-1.81145	0.00196987	0.0284586	UP		unknown protein; BEST Arabidopsis thaliana protein match is: unknown protein (TAIR:AT5G01970.1)		NO
AT1G30270	1.19153	7.12384	1.61049e-07	1.012e-05	UP	CBL-interacting protein kinase 23	CBL-interacting protein kinase 23 (CIPK23); CONTAINS InterPro DOMAIN/s: Protein kinase, ATP binding site (InterPro:IPR017441), Serine/threonine-protein kinase domain (InterPro:IPR002290), NAF/FISL domain (InterPro:IPR018451), Serine/threonine-protein kinase-like domain (InterPro:IPR017442), Protein kinase-like domain (InterPro:IPR011009), Serine/threonine-protein kinase, active site (InterPro:IPR…	NAF domain | NAF/FISL domain | Protein kinase domain | Protein kinase, ATP binding site | Protein kinase-like domain | Serine/threonine-protein kinase, active site | Serine/threonine/dual specificity protein kinase, catalytic domain	NO
AT1G30370	2.8758	-0.935084	0.00016527	0.003779	UP	alpha/beta-Hydrolases superfamily protein	alpha/beta-Hydrolases superfamily protein; FUNCTIONS IN: triglyceride lipase activity; INVOLVED IN: lipid metabolic process; EXPRESSED IN: root; CONTAINS InterPro DOMAIN/s: Lipase, class 3 (InterPro:IPR002921); BEST Arabidopsis thaliana protein match is: alpha/beta-Hydrolases superfamily protein (TAIR:AT1G06800.1)	Alpha/Beta hydrolase fold | Fungal lipase-like domain	NO
AT1G30510	0.830939	5.31222	0.000401049	0.00786247	UP	root FNR 2	root FNR 2 (RFNR2); FUNCTIONS IN: oxidoreductase activity, copper ion binding; INVOLVED IN: oxidation reduction; LOCATED IN: chloroplast, thylakoid membrane; LOCATED IN: thylakoid membrane; EXPRESSED IN: 23 plant structures; EXPRESSED DURING: 13 growth stages; CONTAINS InterPro DOMAIN/s: Ferredoxin reductase-type FAD-binding domain (InterPro:IPR017927), Oxidoreductase FAD/NAD(P)-binding (InterPro…	Ferredoxin reductase-type FAD-binding domain | Ferredoxin--NADP reductase | Flavoprotein pyridine nucleotide cytochrome reductase | Oxidoreductase FAD/NAD(P)-binding | Riboflavin synthase-like beta-barrel	NO
AT1G30550	2.14091	-0.071936	0.000144914	0.00340129	UP	S-adenosyl-L-methionine-dependent methyltransferases superfamily protein	S-adenosyl-L-methionine-dependent methyltransferases superfamily protein; FUNCTIONS IN: methyltransferase activity; INVOLVED IN: RNA capping, RNA methylation; EXPRESSED IN: 21 plant structures; EXPRESSED DURING: 12 growth stages; CONTAINS InterPro DOMAIN/s: RNA cap guanine-N2 methyltransferase (InterPro:IPR019012); BEST Arabidopsis thaliana protein match is: S-adenosyl-L-methionine-dependent meth…	RNA cap guanine-N2 methyltransferase | S-adenosyl-L-methionine-dependent methyltransferase-like	NO
AT1G30620	0.942997	4.3702	0.000135862	0.00321797	UP	NAD(P)-binding Rossmann-fold superfamily protein	MURUS 4 (MUR4); FUNCTIONS IN: UDP-arabinose 4-epimerase activity, catalytic activity; INVOLVED IN: plant-type cell wall biogenesis, arabinose biosynthetic process, nucleotide-sugar metabolic process; LOCATED IN: Golgi apparatus; EXPRESSED IN: 24 plant structures; EXPRESSED DURING: 15 growth stages; CONTAINS InterPro DOMAIN/s: NAD-dependent epimerase/dehydratase (InterPro:IPR001509), NAD(P)-bindin…	NAD(P)-binding domain | NAD-dependent epimerase/dehydratase, N-terminal domain | UDP-glucose 4-epimerase C-terminal domain | UDP-glucose 4-epimerase GalE	NO
AT1G30640	1.04671	4.33823	3.61971e-05	0.00108229	UP	Protein kinase family protein	Protein kinase family protein; FUNCTIONS IN: protein kinase activity, kinase activity; INVOLVED IN: protein amino acid phosphorylation; LOCATED IN: cellular_component unknown; EXPRESSED IN: 24 plant structures; EXPRESSED DURING: 14 growth stages; CONTAINS InterPro DOMAIN/s: Protein kinase, ATP binding site (InterPro:IPR017441), Serine/threonine-protein kinase domain (InterPro:IPR002290), Serine/t…	AGC-kinase, C-terminal | Protein kinase domain | Protein kinase, ATP binding site | Protein kinase, C-terminal | Protein kinase-like domain | Serine/threonine-protein kinase, active site | Serine/threonine/dual specificity protein kinase, catalytic domain	NO
AT1G30700	1.17908	2.94484	0.0036337	0.0467835	UP	FAD-binding Berberine family protein	FAD-binding Berberine family protein; FUNCTIONS IN: electron carrier activity, oxidoreductase activity, FAD binding, catalytic activity; LOCATED IN: endomembrane system; EXPRESSED IN: stem, hypocotyl, root, stamen; EXPRESSED DURING: 4 anthesis; CONTAINS InterPro DOMAIN/s: FAD-binding, type 2 (InterPro:IPR016166), Berberine/berberine-like (InterPro:IPR012951), FAD linked oxidase, N-terminal (Inter…	Berberine/berberine-like | CO dehydrogenase flavoprotein-like, FAD-binding, subdomain 2 | FAD linked oxidase, N-terminal | FAD-binding, type 2	NO
AT1G30750	1.82007	2.54418	1.61818e-07	1.01493e-05	UP		unknown protein; FUNCTIONS IN: molecular_function unknown; INVOLVED IN: biological_process unknown; LOCATED IN: endomembrane system; EXPRESSED IN: hypocotyl, root, pollen tube		NO
AT1G30755	-1.97308	2.85127	8.97256e-09	7.68969e-07	DOWN	Protein of unknown function (DUF668)	Protein of unknown function (DUF668); CONTAINS InterPro DOMAIN/s: Protein of unknown function DUF668 (InterPro:IPR007700), Protein of unknown function DUF3475 (InterPro:IPR021864); BEST Arabidopsis thaliana protein match is: Protein of unknown function (DUF668) (TAIR:AT1G34320.1)	Protein of unknown function DUF3475 | Protein of unknown function DUF668	NO
AT1G30760	1.86863	3.21755	1.73595e-06	8.21189e-05	UP	FAD-binding Berberine family protein	FAD-binding Berberine family protein; FUNCTIONS IN: electron carrier activity, oxidoreductase activity, FAD binding, catalytic activity; LOCATED IN: endomembrane system; EXPRESSED IN: inflorescence meristem, root, flower, pedicel; EXPRESSED DURING: 4 anthesis, petal differentiation and expansion stage; CONTAINS InterPro DOMAIN/s: FAD-binding, type 2 (InterPro:IPR016166), Berberine/berberine-like …	Berberine/berberine-like | CO dehydrogenase flavoprotein-like, FAD-binding, subdomain 2 | FAD linked oxidase, N-terminal | FAD-binding, type 2 | FAD-binding, type 2, subdomain 1	NO
AT1G30810	0.988428	5.4361	1.15734e-05	0.000416012	UP	Transcription factor jumonji (jmj) family protein / zinc finger (C5HC2 type) family protein	Transcription factor jumonji (jmj) family protein / zinc finger (C5HC2 type) family protein; FUNCTIONS IN: sequence-specific DNA binding transcription factor activity; INVOLVED IN: regulation of transcription; LOCATED IN: nucleus; EXPRESSED IN: 18 plant structures; EXPRESSED IN: 19 plant structures; EXPRESSED DURING: 8 growth stages; CONTAINS InterPro DOMAIN/s: Transcription factor jumonji/aspart…	FY-rich, C-terminal | FY-rich, N-terminal | JmjC domain | Transcription factor jumonji, JmjN | Zinc finger, C5HC2-type	NO
AT1G30850	2.32437	0.99831	4.85483e-05	0.00137755	UP	root hair specific 4	root hair specific 4 (RSH4); BEST Arabidopsis thaliana protein match is: unknown protein (TAIR:AT2G34910.1)		NO
AT1G30870	2.06066	4.18839	8.4295e-06	0.000319363	UP	Peroxidase superfamily protein	Peroxidase superfamily protein; FUNCTIONS IN: peroxidase activity, heme binding; INVOLVED IN: oxidation reduction, response to oxidative stress; LOCATED IN: endomembrane system; EXPRESSED IN: root; CONTAINS InterPro DOMAIN/s: Haem peroxidase (InterPro:IPR010255), Plant peroxidase (InterPro:IPR000823), Peroxidases heam-ligand binding site (InterPro:IPR019793), Haem peroxidase, plant/fungal/bacteri…	Haem peroxidase | Haem peroxidase, plant/fungal/bacterial | Peroxidase, active site | Peroxidases heam-ligand binding site | Plant peroxidase	NO
AT1G30900	1.07416	2.97317	0.000563532	0.0103604	UP	VACUOLAR SORTING RECEPTOR 6	VACUOLAR SORTING RECEPTOR 6 (VSR6); FUNCTIONS IN: calcium ion binding; INVOLVED IN: protein targeting to vacuole; LOCATED IN: integral to plasma membrane, Golgi transport complex; EXPRESSED IN: 20 plant structures; EXPRESSED DURING: 10 growth stages; CONTAINS InterPro DOMAIN/s: Protease-associated PA (InterPro:IPR003137), EGF-like calcium-binding, conserved site (InterPro:IPR018097), EGF-like cal…	Complement Clr-like EGF domain | EGF-like calcium-binding, conserved site | Protease-associated domain, PA	NO
AT1G31173	1.45218	4.13994	1.55063e-06	7.45032e-05	UP	MIR167D; miRNA			NO
AT1G31220	1.14499	4.12322	3.99025e-06	0.000167576	UP	Formyl transferase	Formyl transferase; FUNCTIONS IN: hydroxymethyl-, formyl- and related transferase activity, phosphoribosylglycinamide formyltransferase activity, formyltetrahydrofolate deformylase activity; INVOLVED IN: purine ribonucleotide biosynthetic process, biosynthetic process; LOCATED IN: chloroplast; EXPRESSED IN: 20 plant structures; EXPRESSED DURING: 12 growth stages; CONTAINS InterPro DOMAIN/s: Phosp…	Formyl transferase, N-terminal | Phosphoribosylglycinamide formyltransferase | Phosphoribosylglycinamide formyltransferase, active site	NO
AT1G31280	1.3788	4.7518	9.81637e-07	5.0247e-05	UP	Argonaute family protein	argonaute 2 (AGO2); FUNCTIONS IN: nucleic acid binding; INVOLVED IN: biological_process unknown; LOCATED IN: cellular_component unknown; EXPRESSED IN: 21 plant structures; EXPRESSED DURING: 12 growth stages; CONTAINS InterPro DOMAIN/s: Domain of unknown function DUF1785 (InterPro:IPR014811), Stem cell self-renewal protein Piwi (InterPro:IPR003165), Argonaute/Dicer protein, PAZ (InterPro:IPR003100…	Domain of unknown function DUF1785 | PAZ domain | Ribonuclease H-like domain | Stem cell self-renewal protein Piwi	NO
AT1G31290	1.02099	4.40653	4.02183e-05	0.00117586	UP	ARGONAUTE 3	ARGONAUTE 3 (AGO3); FUNCTIONS IN: nucleic acid binding; INVOLVED IN: biological_process unknown; LOCATED IN: cellular_component unknown; EXPRESSED IN: 11 plant structures; EXPRESSED DURING: LP.06 six leaves visible, LP.04 four leaves visible, 4 anthesis, C globular stage, petal differentiation and expansion stage; CONTAINS InterPro DOMAIN/s: Domain of unknown function DUF1785 (InterPro:IPR014811)…	Domain of unknown function DUF1785 | PAZ domain | Ribonuclease H-like domain | Stem cell self-renewal protein Piwi	NO
AT1G31420	2.1667	8.16842	3.55956e-19	2.46226e-16	UP	Leucine-rich repeat protein kinase family protein	FEI 1 (FEI1); FUNCTIONS IN: protein serine/threonine kinase activity, kinase activity, ATP binding; INVOLVED IN: protein amino acid phosphorylation, transmembrane receptor protein tyrosine kinase signaling pathway, plant-type cell wall organization, unidimensional cell growth; LOCATED IN: endomembrane system; EXPRESSED IN: 23 plant structures; EXPRESSED DURING: 13 growth stages; CONTAINS InterPro…	Leucine-rich repeat | Leucine-rich repeat-containing N-terminal, type 2 | Protein kinase domain | Protein kinase, ATP binding site | Protein kinase-like domain | Serine/threonine-protein kinase, active site	NO
AT1G31460	1.16001	2.80033	0.000279636	0.00584996	UP		unknown protein; FUNCTIONS IN: molecular_function unknown; INVOLVED IN: biological_process unknown; LOCATED IN: plasma membrane; EXPRESSED IN: 23 plant structures; EXPRESSED DURING: 13 growth stages; BEST Arabidopsis thaliana protein match is: unknown protein (TAIR:AT1G23270.1)		NO
AT1G31480	1.45046	5.15803	8.40247e-09	7.25651e-07	UP	shoot gravitropism 2 (SGR2)	SHOOT GRAVITROPISM 2 (SGR2); FUNCTIONS IN: phospholipase A1 activity; INVOLVED IN: gravitropism, negative gravitropism, detection of gravity, amyloplast organization; LOCATED IN: plant-type vacuole membrane, vacuole; EXPRESSED IN: 25 plant structures; EXPRESSED DURING: 13 growth stages; CONTAINS InterPro DOMAIN/s: DDHD (InterPro:IPR004177)	Alpha/Beta hydrolase fold | DDHD	NO
AT1G31490	2.25136	-1.80553	0.0028167	0.0384709	UP	HXXXD-type acyl-transferase family protein	HXXXD-type acyl-transferase family protein; FUNCTIONS IN: transferase activity, transferring acyl groups other than amino-acyl groups, quinone binding, primary amine oxidase activity, copper ion binding, transferase activity; INVOLVED IN: oxidation reduction, amine metabolic process; LOCATED IN: chloroplast; EXPRESSED IN: 8 plant structures; EXPRESSED DURING: 4 anthesis, C globular stage, petal d…	Chloramphenicol acetyltransferase-like domain | Copper amine oxidase, N-terminal | Transferase	NO
AT1G31690	-5.3321	1.06773	2.24324e-17	1.21862e-14	DOWN	Copper amine oxidase family protein	Copper amine oxidase family protein; FUNCTIONS IN: quinone binding, primary amine oxidase activity, copper ion binding; INVOLVED IN: oxidation reduction, amine metabolic process; LOCATED IN: endomembrane system; EXPRESSED IN: 9 plant structures; EXPRESSED DURING: 7 growth stages; CONTAINS InterPro DOMAIN/s: Copper amine oxidase, N-terminal (InterPro:IPR016182), Copper amine oxidase, N2/N3-termina…	Copper amine oxidase | Copper amine oxidase, C-terminal | Copper amine oxidase, N-terminal | Copper amine oxidase, N2-terminal | Copper amine oxidase, N2/N3-terminal | Copper amine oxidase, N3-terminal	NO
AT1G31770	0.728395	4.52039	0.00316982	0.042016	UP	ATP-binding cassette 14	ATP-binding cassette 14 (ABCG14); FUNCTIONS IN: ATPase activity, coupled to transmembrane movement of substances; LOCATED IN: membrane; EXPRESSED IN: 23 plant structures; EXPRESSED DURING: 13 growth stages; CONTAINS InterPro DOMAIN/s: ATPase, AAA+ type, core (InterPro:IPR003593), ABC transporter-like (InterPro:IPR003439), ABC-2 type transporter (InterPro:IPR013525), ABC transporter, conserved sit…	AAA+ ATPase domain | ABC transporter, conserved site | ABC transporter-like | ABC-2 type transporter | P-loop containing nucleoside triphosphate hydrolase	NO
AT1G31820	0.785312	4.23509	0.00274609	0.0376286	UP	Amino acid permease family protein	Amino acid permease family protein; FUNCTIONS IN: cationic amino acid transmembrane transporter activity; INVOLVED IN: transport, amino acid transport, transmembrane transport; LOCATED IN: membrane; EXPRESSED IN: 18 plant structures; EXPRESSED DURING: 9 growth stages; CONTAINS InterPro DOMAIN/s: Amino acid/polyamine transporter I (InterPro:IPR002293), Amino acid permease domain (InterPro:IPR00484…	Amino acid/polyamine transporter I	NO
AT1G31935	0.96428	3.19209	0.000997999	0.0164692	UP	other RNA			NO
AT1G31950	1.23674	2.69888	0.000777885	0.0134497	UP	Terpenoid cyclases/Protein prenyltransferases superfamily protein	Terpenoid cyclases/Protein prenyltransferases superfamily protein; FUNCTIONS IN: lyase activity, magnesium ion binding; INVOLVED IN: metabolic process; LOCATED IN: membrane; EXPRESSED IN: 7 plant structures; EXPRESSED DURING: LP.04 four leaves visible, LP.02 two leaves visible, petal differentiation and expansion stage; CONTAINS InterPro DOMAIN/s: Terpene synthase, metal-binding domain (InterPro:…		NO
AT1G32100	0.827393	3.82182	0.00191537	0.0278428	UP	pinoresinol reductase 1	pinoresinol reductase 1 (PRR1); CONTAINS InterPro DOMAIN/s: NAD(P)-binding domain (InterPro:IPR016040), NmrA-like (InterPro:IPR008030); BEST Arabidopsis thaliana protein match is: pinoresinol reductase 2 (TAIR:AT4G13660.1)	NAD(P)-binding domain | NmrA-like domain	NO
AT1G32350	-1.887	-0.482877	0.00163904	0.0244593	DOWN	alternative oxidase 1D	alternative oxidase 1D (AOX1D); FUNCTIONS IN: alternative oxidase activity; INVOLVED IN: oxidation reduction, response to cyclopentenone; LOCATED IN: mitochondrial envelope, mitochondrion; EXPRESSED IN: stem, sepal, leaf, stamen; EXPRESSED DURING: LP.04 four leaves visible, 4 anthesis, petal differentiation and expansion stage; CONTAINS InterPro DOMAIN/s: Alternative oxidase (InterPro:IPR002680);…	Alternative oxidase	NO
AT1G32385	1.79285	1.83904	0.000709185	0.0124342	UP	snoRNA	snoRNA		NO
AT1G32560	-2.41407	1.11571	0.00337558	0.0442213	DOWN	Late embryogenesis abundant protein, group 1 protein	Late embryogenesis abundant protein, group 1 protein; FUNCTIONS IN: molecular_function unknown; INVOLVED IN: embryo development, embryo development ending in seed dormancy; LOCATED IN: cellular_component unknown; EXPRESSED IN: stem; CONTAINS InterPro DOMAIN/s: Late embryogenesis abundant protein, group 1 (InterPro:IPR005513); BEST Arabidopsis thaliana protein match is: Late embryogenesis abundant…	Late embryogenesis abundant protein, LEA-25/LEA-D113	NO
AT1G32582	5.7311	-2.33141	6.10782e-05	0.00165901	UP	MIR400; miRNA			NO
AT1G32583	2.09964	3.44752	2.94959e-12	5.61272e-10	UP		FUNCTIONS IN: molecular_function unknown; INVOLVED IN: biological_process unknown; LOCATED IN: endomembrane system; BEST Arabidopsis thaliana protein match is: tapetum determinant 1 (TAIR:AT4G24972.1)		NO
AT1G32680	4.82438	-1.64715	1.03658e-06	5.25799e-05	UP	transposable element gene	similar to unknown protein [Arabidopsis thaliana] (TAIR:AT5G35880.1)		NO
AT1G32690	0.847646	3.53934	0.003512	0.0455773	UP		unknown protein; FUNCTIONS IN: molecular_function unknown; INVOLVED IN: biological_process unknown; LOCATED IN: plasma membrane; EXPRESSED IN: 21 plant structures; EXPRESSED DURING: 11 growth stages; BEST Arabidopsis thaliana protein match is: unknown protein (TAIR:AT2G35200.1)		NO
AT1G32950	1.89674	0.358582	4.50983e-05	0.00129163	UP	Subtilase family protein	Subtilase family protein; FUNCTIONS IN: identical protein binding, serine-type endopeptidase activity; INVOLVED IN: proteolysis, negative regulation of catalytic activity; LOCATED IN: endomembrane system; EXPRESSED IN: stem, stamen; EXPRESSED DURING: 4 anthesis; CONTAINS InterPro DOMAIN/s: Protease-associated PA (InterPro:IPR003137), Proteinase inhibitor, propeptide (InterPro:IPR009020), Peptidas…	Peptidase S8, subtilisin, His-active site | Peptidase S8, subtilisin, Ser-active site | Peptidase S8, subtilisin-related | Peptidase S8/S53 domain | Protease-associated domain, PA | Proteinase inhibitor I9	NO
AT1G33280	1.97547	0.0164766	0.00092061	0.0154034	UP	NAC domain containing protein 15	NAC domain containing protein 15 (NAC015); CONTAINS InterPro DOMAIN/s: No apical meristem (NAM) protein (InterPro:IPR003441); BEST Arabidopsis thaliana protein match is: NAC domain containing protein 70 (TAIR:AT4G10350.1)	NAC domain	NO
AT1G33500	1.88008	-1.45078	0.00266818	0.0367254	UP		unknown protein		NO
AT1G33600	-0.763332	5.81252	0.000688632	0.0121561	DOWN	Leucine-rich repeat (LRR) family protein	Leucine-rich repeat (LRR) family protein; INVOLVED IN: signal transduction; LOCATED IN: cell wall, membrane, plant-type cell wall; EXPRESSED IN: 22 plant structures; EXPRESSED DURING: 13 growth stages; CONTAINS InterPro DOMAIN/s: Leucine-rich repeat-containing N-terminal domain, type 2 (InterPro:IPR013210), Leucine-rich repeat (InterPro:IPR001611); BEST Arabidopsis thaliana protein match is: Leuc…	Leucine-rich repeat | Leucine-rich repeat-containing N-terminal, type 2	YES	1:12182360:AG-A;intronic_variant
AT1G33700	1.58436	5.00765	1.57446e-07	9.96792e-06	UP	Beta-glucosidase, GBA2 type family protein	Beta-glucosidase, GBA2 type family protein; FUNCTIONS IN: catalytic activity, glucosylceramidase activity; FUNCTIONS IN: glucosylceramidase activity, catalytic activity; INVOLVED IN: glucosylceramide catabolic process, sphingolipid metabolic process; LOCATED IN: vacuole; EXPRESSED IN: 8 plant structures; EXPRESSED DURING: 4 anthesis, petal differentiation and expansion stage; CONTAINS InterPro DO…	Beta-glucosidase, GBA2 type | Beta-glucosidase, GBA2 type, N-terminal | Glucosylceramidase | Six-hairpin glycosidase | Six-hairpin glycosidase-like	YES	1:12208607:G-GTTTTTT;exonic_variant
AT1G33750	1.48582	2.86769	7.93644e-05	0.0020566	UP	Terpenoid cyclases/Protein prenyltransferases superfamily protein	Terpenoid cyclases/Protein prenyltransferases superfamily protein; FUNCTIONS IN: lyase activity, magnesium ion binding; INVOLVED IN: metabolic process; EXPRESSED IN: root; CONTAINS InterPro DOMAIN/s: Terpene synthase, metal-binding domain (InterPro:IPR005630), Terpenoid synthase (InterPro:IPR008949), Terpenoid cylases/protein prenyltransferase alpha-alpha toroid (InterPro:IPR008930), Terpene synt…	Terpene synthase, N-terminal domain | Terpene synthase, metal-binding domain | Terpenoid cyclases/protein prenyltransferase alpha-alpha toroid | Terpenoid synthase	NO
AT1G33800	1.80365	4.33763	1.09719e-07	7.21767e-06	UP	Protein of unknown function (DUF579)	Protein of unknown function (DUF579); FUNCTIONS IN: molecular_function unknown; INVOLVED IN: biological_process unknown; LOCATED IN: endomembrane system; EXPRESSED IN: 20 plant structures; EXPRESSED DURING: 12 growth stages; CONTAINS InterPro DOMAIN/s: Protein of unknown function DUF579 (InterPro:IPR021148), Conserved hypothetical protein CHP01627 (InterPro:IPR006514); BEST Arabidopsis thaliana p…	Putative polysaccharide biosynthesis protein | Xylan biosynthesis protein IRX15/IRX15L	NO
AT1G33960	2.69163	0.246978	5.82207e-05	0.00159946	UP	P-loop containing nucleoside triphosphate hydrolases superfamily protein	AVRRPT2-INDUCED GENE 1 (AIG1); FUNCTIONS IN: GTP binding; INVOLVED IN: response to bacterium; EXPRESSED IN: 11 plant structures; EXPRESSED DURING: 8 growth stages; CONTAINS InterPro DOMAIN/s: AIG1 (InterPro:IPR006703); BEST Arabidopsis thaliana protein match is: Avirulence induced gene (AIG1) family protein (TAIR:AT1G33950.1)	AIG1 | P-loop containing nucleoside triphosphate hydrolase	NO
AT1G34040	2.39301	2.67374	6.63093e-12	1.20073e-09	UP	Pyridoxal phosphate (PLP)-dependent transferases superfamily protein	Pyridoxal phosphate (PLP)-dependent transferases superfamily protein; FUNCTIONS IN: pyridoxal phosphate binding, carbon-sulfur lyase activity, catalytic activity; INVOLVED IN: biological_process unknown; LOCATED IN: endomembrane system; CONTAINS InterPro DOMAIN/s: Pyridoxal phosphate-dependent transferase, major domain (InterPro:IPR015424), EGF-like, alliinase (InterPro:IPR006947), Pyridoxal phos…	Allinase, C-terminal | EGF-like, alliinase | Pyridoxal phosphate-dependent transferase | Pyridoxal phosphate-dependent transferase, major region, subdomain 1 | Pyridoxal phosphate-dependent transferase, major region, subdomain 2	NO
AT1G34060	1.31673	1.48896	0.00118505	0.0188629	UP	Pyridoxal phosphate (PLP)-dependent transferases superfamily protein	Pyridoxal phosphate (PLP)-dependent transferases superfamily protein; FUNCTIONS IN: carbon-sulfur lyase activity, pyridoxal phosphate binding, catalytic activity; LOCATED IN: endomembrane system; CONTAINS InterPro DOMAIN/s: Pyridoxal phosphate-dependent transferase, major domain (InterPro:IPR015424), EGF-like, alliinase (InterPro:IPR006947), Pyridoxal phosphate-dependent transferase, major region…	Allinase, C-terminal | EGF-like, alliinase | Pyridoxal phosphate-dependent transferase | Pyridoxal phosphate-dependent transferase, major region, subdomain 1 | Pyridoxal phosphate-dependent transferase, major region, subdomain 2	NO
AT1G34140	-3.21373	-1.6979	0.000155534	0.00360284	DOWN	poly(A) binding protein 1	poly(A) binding protein 1 (PAB1); CONTAINS InterPro DOMAIN/s: RNA recognition motif, RNP-1 (InterPro:IPR000504), Nucleotide-binding, alpha-beta plait (InterPro:IPR012677), RNA recognition, domain 1 (InterPro:IPR003954); BEST Arabidopsis thaliana protein match is: poly(A)-binding protein 5 (TAIR:AT1G71770.2)		NO
AT1G34260	1.39433	5.0315	1.34976e-07	8.69242e-06	UP	FORMS APLOID AND BINUCLEATE CELLS 1A	FORMS APLOID AND BINUCLEATE CELLS 1A (FAB1D); FUNCTIONS IN: 1-phosphatidylinositol-4-phosphate 5-kinase activity, phosphatidylinositol phosphate kinase activity, ATP binding; INVOLVED IN: phosphatidylinositol metabolic process, cellular protein metabolic process; LOCATED IN: cellular_component unknown; EXPRESSED IN: 25 plant structures; EXPRESSED DURING: 15 growth stages; CONTAINS InterPro DOMAIN…	Chaperonin Cpn60/TCP-1 | GroEL-like apical domain | Phosphatidylinositol-4-phosphate 5-kinase, C-terminal | Phosphatidylinositol-4-phosphate 5-kinase, N-terminal domain | Phosphatidylinositol-4-phosphate 5-kinase, core	NO
AT1G34540	2.465	-1.25826	0.000561674	0.0103376	UP	cytochrome P450, family 94, subfamily D, polypeptide 1	cytochrome P450, family 94, subfamily D, polypeptide 1 (CYP94D1); FUNCTIONS IN: electron carrier activity, monooxygenase activity, iron ion binding, oxygen binding, heme binding; INVOLVED IN: oxidation reduction; LOCATED IN: endomembrane system; CONTAINS InterPro DOMAIN/s: Cytochrome P450 (InterPro:IPR001128), Cytochrome P450, E-class, group I (InterPro:IPR002401), Cytochrome P450, conserved site…	Cytochrome P450 | Cytochrome P450, E-class, group I | Cytochrome P450, conserved site	NO
AT1G34670	1.41581	1.59078	0.000279206	0.00584821	UP	myb domain protein 93	myb domain protein 93 (MYB93); CONTAINS InterPro DOMAIN/s: SANT, DNA-binding (InterPro:IPR001005), Homeodomain-like (InterPro:IPR009057), Myb, DNA-binding (InterPro:IPR014778), HTH transcriptional regulator, Myb-type, DNA-binding (InterPro:IPR017930), Homeodomain-related (InterPro:IPR012287), Myb transcription factor (InterPro:IPR015495); BEST Arabidopsis thaliana protein match is: myb domain pro…	Homeodomain-like | Myb domain | SANT/Myb domain	NO
AT1G35240	6.52792	1.38108	5.42095e-27	9.12915e-24	UP	auxin response factor 20	auxin response factor 20 (ARF20); FUNCTIONS IN: sequence-specific DNA binding transcription factor activity; INVOLVED IN: regulation of transcription; LOCATED IN: nucleus; CONTAINS InterPro DOMAIN/s: Aux/IAA-ARF-dimerisation (InterPro:IPR011525), Transcriptional factor B3 (InterPro:IPR003340), AUX/IAA protein (InterPro:IPR003311), Auxin response factor (InterPro:IPR010525); BEST Arabidopsis thali…	AUX/IAA protein | Aux/IAA-ARF-dimerisation | Auxin response factor | B3 DNA binding domain | DNA-binding pseudobarrel domain	NO
AT1G35250	1.52217	2.11003	1.17018e-05	0.00041973	UP	Thioesterase superfamily protein	Thioesterase superfamily protein; CONTAINS InterPro DOMAIN/s: Thioesterase superfamily (InterPro:IPR006683); BEST Arabidopsis thaliana protein match is: Thioesterase superfamily protein (TAIR:AT1G35290.1)	HotDog domain	NO
AT1G35255	1.73635	-0.820388	0.00167153	0.0248449	UP		unknown protein		NO
AT1G35270	5.3436	-2.57689	0.00168194	0.0249667	UP		pseudogene, hypothetical protein		NO
AT1G35290	1.11038	0.93732	0.00342127	0.0446512	UP	Thioesterase superfamily protein	Thioesterase superfamily protein; CONTAINS InterPro DOMAIN/s: Thioesterase superfamily (InterPro:IPR006683); BEST Arabidopsis thaliana protein match is: Thioesterase superfamily protein (TAIR:AT1G35250.1)	HotDog domain | Thioesterase superfamily	NO
AT1G35350	-1.31923	2.6132	0.00330412	0.0434881	DOWN	EXS (ERD1/XPR1/SYG1) family protein	EXS (ERD1/XPR1/SYG1) family protein; LOCATED IN: integral to membrane; EXPRESSED IN: 18 plant structures; EXPRESSED DURING: 9 growth stages; CONTAINS InterPro DOMAIN/s: EXS, C-terminal (InterPro:IPR004342), SPX, N-terminal (InterPro:IPR004331); BEST Arabidopsis thaliana protein match is: EXS (ERD1/XPR1/SYG1) family protein (TAIR:AT1G26730.1)	EXS, C-terminal | SPX, N-terminal	NO
AT1G35513	3.26753	1.2772	8.19066e-14	2.22475e-11	UP				NO
AT1G35516	-0.971048	5.80129	2.67713e-05	0.000838776	DOWN	myb-like transcription factor family protein	myb-like transcription factor family protein; CONTAINS InterPro DOMAIN/s: Myb transcription factor (InterPro:IPR015495)		NO
AT1G35780	0.724706	5.25303	0.00292459	0.0395753	UP		unknown protein; BEST Arabidopsis thaliana protein match is: unknown protein (TAIR:AT1G78150.2)	Domain of unknown function DUF4057	NO
AT1G36390	-0.782141	4.86631	0.00217681	0.0310009	DOWN	Co-chaperone GrpE family protein	Co-chaperone GrpE family protein; FUNCTIONS IN: copper ion binding; INVOLVED IN: protein folding, protein import into mitochondrial matrix; LOCATED IN: chloroplast; LOCATED IN: chloroplast, chloroplast stroma; EXPRESSED IN: 22 plant structures; EXPRESSED DURING: 13 growth stages; CONTAINS InterPro DOMAIN/s: GrpE nucleotide exchange factor (InterPro:IPR000740), GrpE nucleotide exchange factor, coi…	GrpE nucleotide exchange factor | GrpE nucleotide exchange factor, coiled-coil | GrpE nucleotide exchange factor, head	NO
AT1G36520	3.08001	-1.79912	0.000687721	0.0121464	UP	transposable element gene	gypsy-like retrotransposon family (Athila), has a 4.4e-307 P-value blast match to GB:CAA57397 Athila ORF 1 (Arabidopsis thaliana)		NO
AT1G36920	3.62745	-1.93935	5.21379e-05	0.00145973	UP		FUNCTIONS IN: molecular_function unknown; INVOLVED IN: biological_process unknown; LOCATED IN: endomembrane system; EXPRESSED IN: stem, male gametophyte, flower; EXPRESSED DURING: M germinated pollen stage, 4 anthesis; BEST Arabidopsis thaliana protein match is: Nucleic acid-binding, OB-fold-like protein (TAIR:AT2G05642.1)		NO
AT1G36922	3.49473	-2.53229	0.00384771	0.0488483	UP		unknown protein		NO
AT1G37130	-1.33736	9.53566	6.0083e-07	3.26923e-05	DOWN	nitrate reductase 2	nitrate reductase 2 (NIA2); FUNCTIONS IN: nitrate reductase activity, nitrate reductase (NADH) activity; INVOLVED IN: nitric oxide biosynthetic process, nitrate assimilation, response to light stimulus, response to symbiotic fungus; LOCATED IN: plasma membrane, vacuole; EXPRESSED IN: 25 plant structures; EXPRESSED DURING: 13 growth stages; CONTAINS InterPro DOMAIN/s: Nitrate reductase NADH depend…	Cytochrome b5, heme-binding site | Cytochrome b5-like heme/steroid binding domain | Eukaryotic molybdopterin oxidoreductase | Ferredoxin reductase-type FAD-binding domain | Flavoprotein pyridine nucleotide cytochrome reductase | Immunoglobulin E-set | Moybdenum cofactor oxidoreductase, dimerisation | NADH:cytochrome b5 reductase (CBR) | Nitrate reductase NADH dependent | Oxidoreductase FAD/NAD(P)…	NO
AT1G41830	1.02321	6.39996	1.33557e-05	0.000470044	UP	SKU5-similar 6	SKU5-similar 6 (SKS6); FUNCTIONS IN: pectinesterase activity; INVOLVED IN: oxidation reduction; LOCATED IN: apoplast, cell wall, membrane, plant-type cell wall; EXPRESSED IN: 23 plant structures; EXPRESSED DURING: 13 growth stages; CONTAINS InterPro DOMAIN/s: Cupredoxin (InterPro:IPR008972), Multicopper oxidase, type 2 (InterPro:IPR011706), Multicopper oxidase, type 3 (InterPro:IPR011707), Multic…	Cupredoxin | Multicopper oxidase, type 1 | Multicopper oxidase, type 2 | Multicopper oxidase, type 3	NO
AT1G42540	0.850313	5.34068	0.000968602	0.0160707	UP	glutamate receptor 3.3	glutamate receptor 3.3 (GLR3.3); FUNCTIONS IN: intracellular ligand-gated ion channel activity; INVOLVED IN: cellular calcium ion homeostasis, response to light stimulus; LOCATED IN: integral to membrane, membrane; EXPRESSED IN: 22 plant structures; EXPRESSED DURING: 11 growth stages; CONTAINS InterPro DOMAIN/s: Extracellular solute-binding protein, family 3 (InterPro:IPR001638), Ionotropic gluta…	Extracellular ligand-binding receptor | Extracellular solute-binding protein, family 3 | Ionotropic glutamate receptor | Ionotropic glutamate receptor, plant | Periplasmic binding protein-like I	NO
AT1G43020	1.64129	1.2012	3.03744e-05	0.000929191	UP	Protein of unknown function, DUF547	Protein of unknown function, DUF547; FUNCTIONS IN: molecular_function unknown; BEST Arabidopsis thaliana protein match is: Protein of unknown function, DUF547 (TAIR:AT1G21060.2); INVOLVED IN: biological_process unknown; LOCATED IN: cellular_component unknown; EXPRESSED IN: hypocotyl, male gametophyte, root; EXPRESSED DURING: L mature pollen stage; CONTAINS InterPro DOMAIN/s: Protein of unknown fu…	Domain of unknown function DUF547	NO
AT1G43040	2.14568	-1.4932	0.00152466	0.0230796	UP	SAUR-like auxin-responsive protein family	SAUR-like auxin-responsive protein family ; CONTAINS InterPro DOMAIN/s: Auxin responsive SAUR protein (InterPro:IPR003676); BEST Arabidopsis thaliana protein match is: SAUR-like auxin-responsive protein family (TAIR:AT5G42410.1)	Auxin-induced protein, ARG7	NO
AT1G43160	1.7195	2.68329	6.42729e-06	0.00025404	UP	related to AP2 6	related to AP2 6 (RAP2.6); CONTAINS InterPro DOMAIN/s: DNA-binding, integrase-type (InterPro:IPR016177), Pathogenesis-related transcriptional factor/ERF, DNA-binding (InterPro:IPR001471); BEST Arabidopsis thaliana protein match is: Integrase-type DNA-binding superfamily protein (TAIR:AT5G61890.1)	AP2/ERF domain | DNA-binding domain	NO
AT1G43775	-2.09361	2.97026	3.23294e-11	4.88906e-09	DOWN	transposable element gene	copia-like retrotransposon family, has a 3.6e-147 P-value blast match to dbj|BAA78426.1| polyprotein (AtRE2-1) (Arabidopsis thaliana) (Ty1_Copia-element)		NO
AT1G43780	-5.00166	-0.252957	0.00175923	0.0258519	DOWN	serine carboxypeptidase-like 44	serine carboxypeptidase-like 44 (scpl44); FUNCTIONS IN: serine-type carboxypeptidase activity; INVOLVED IN: proteolysis; LOCATED IN: endomembrane system; EXPRESSED IN: 10 plant structures; EXPRESSED DURING: 4 anthesis, F mature embryo stage, petal differentiation and expansion stage, E expanded cotyledon stage; CONTAINS InterPro DOMAIN/s: Peptidase S10, serine carboxypeptidase (InterPro:IPR001563…	Alpha/Beta hydrolase fold | Peptidase S10, serine carboxypeptidase | Peptidase S10, serine carboxypeptidase, active site	NO
AT1G43800	2.42753	3.88474	4.49585e-08	3.25102e-06	UP	Plant stearoyl-acyl-carrier-protein desaturase family protein	Plant stearoyl-acyl-carrier-protein desaturase family protein; FUNCTIONS IN: acyl-[acyl-carrier-protein] desaturase activity, oxidoreductase activity, transition metal ion binding; INVOLVED IN: oxidation reduction, fatty acid metabolic process, fatty acid biosynthetic process; LOCATED IN: membrane; EXPRESSED IN: 9 plant structures; EXPRESSED DURING: 6 growth stages; CONTAINS InterPro DOMAIN/s: Ri…	Fatty acid desaturase, type 2 | Ferritin-like superfamily | Ribonucleotide reductase-related | Stearoyl-ACP desaturase, conserved site	NO
AT1G44125	0.817874	3.47358	0.0037463	0.047904	UP				NO
AT1G44170	0.732089	5.16577	0.00219045	0.0311425	UP	aldehyde dehydrogenase 3H1	aldehyde dehydrogenase 3H1 (ALDH3H1); FUNCTIONS IN: 3-chloroallyl aldehyde dehydrogenase activity, aldehyde dehydrogenase (NAD) activity; INVOLVED IN: response to desiccation, response to salt stress, response to abscisic acid stimulus; LOCATED IN: endoplasmic reticulum, plastid, membrane; LOCATED IN: endoplasmic reticulum, plastid, vacuole, membrane; EXPRESSED IN: 22 plant structures; EXPRESSED …	Aldehyde dehydrogenase NAD(P)-dependent | Aldehyde dehydrogenase domain | Aldehyde dehydrogenase, C-terminal | Aldehyde dehydrogenase, N-terminal | Aldehyde dehydrogenase, glutamic acid active site | Aldehyde/histidinol dehydrogenase	NO
AT1G44800	1.31386	4.76583	3.62001e-06	0.000154076	UP	nodulin MtN21 /EamA-like transporter family protein	nodulin MtN21 /EamA-like transporter family protein; FUNCTIONS IN: molecular_function unknown; LOCATED IN: membrane; EXPRESSED IN: 22 plant structures; EXPRESSED DURING: 11 growth stages; CONTAINS InterPro DOMAIN/s: Protein of unknown function DUF6, transmembrane (InterPro:IPR000620); BEST Arabidopsis thaliana protein match is: nodulin MtN21 /EamA-like transporter family protein (TAIR:AT4G08300.1)	Drug/metabolite transporter	NO
AT1G44970	1.73486	2.16254	2.94907e-05	0.00090694	UP	Peroxidase superfamily protein	Peroxidase superfamily protein; FUNCTIONS IN: peroxidase activity, heme binding; INVOLVED IN: response to oxidative stress, oxidation reduction; LOCATED IN: endomembrane system; EXPRESSED IN: 17 plant structures; EXPRESSED DURING: 7 growth stages; CONTAINS InterPro DOMAIN/s: Haem peroxidase (InterPro:IPR010255), Plant peroxidase (InterPro:IPR000823), Peroxidases heam-ligand binding site (InterPro…	Haem peroxidase | Haem peroxidase, plant/fungal/bacterial | Peroxidase, active site | Peroxidases heam-ligand binding site | Plant peroxidase	NO
AT1G45130	0.923928	6.07249	5.60704e-05	0.00155109	UP	beta-galactosidase 5	beta-galactosidase 5 (BGAL5); FUNCTIONS IN: cation binding, beta-galactosidase activity, hydrolase activity, hydrolyzing O-glycosyl compounds, catalytic activity; INVOLVED IN: lactose catabolic process, using glucoside 3-dehydrogenase, carbohydrate metabolic process, lactose catabolic process via UDP-galactose, lactose catabolic process; LOCATED IN: endomembrane system; EXPRESSED IN: 24 plant str…	Beta-galactosidase jelly roll domain | Galactose-binding domain-like | Glycoside hydrolase, catalytic domain | Glycoside hydrolase, family 35 | Glycoside hydrolase, family 35, conserved site | Glycoside hydrolase, superfamily	NO
AT1G45180	1.58197	3.92351	1.32956e-09	1.40895e-07	UP	RING/U-box superfamily protein	RING/U-box superfamily protein; FUNCTIONS IN: zinc ion binding; EXPRESSED IN: 18 plant structures; EXPRESSED DURING: 11 growth stages; CONTAINS InterPro DOMAIN/s: Zinc finger, RING-type (InterPro:IPR001841), Zinc finger, C3HC4 RING-type (InterPro:IPR018957); BEST Arabidopsis thaliana protein match is: RING/U-box superfamily protein (TAIR:AT5G42940.1)	Zinc finger, RING-type | Zinc finger, RING/FYVE/PHD-type	NO
AT1G47265	5.55163	-1.06589	4.51906e-10	5.37831e-08	UP		unknown protein; FUNCTIONS IN: molecular_function unknown; INVOLVED IN: biological_process unknown; LOCATED IN: cellular_component unknown		NO
AT1G47405	3.11484	0.479556	0.00171211	0.0253586	UP	transposable element gene	pseudogene, similar to SAE1-S9-protein, similar to putative non-LTR retroelement reverse transcriptase GB:AAC63678 (Arabidopsis thaliana) from (; blastp match of 39% identity and 2.2e-18 P-value to GP|4760708|dbj|BAA77394.1||AB012866 SAE1-S9-protein {Brassica rapa}		NO
AT1G47600	1.44182	3.25297	0.000288565	0.00599578	UP	beta glucosidase 34	beta glucosidase 34 (BGLU34); FUNCTIONS IN: thioglucosidase activity, beta-glucosidase activity, hydrolase activity, hydrolyzing O-glycosyl compounds; INVOLVED IN: glucosinolate metabolic process; INVOLVED IN: glucosinolate metabolic process, response to salt stress; LOCATED IN: endomembrane system; CONTAINS InterPro DOMAIN/s: Glycoside hydrolase, family 1 (InterPro:IPR001360), Glycoside hydrolas…	Glycoside hydrolase, catalytic domain | Glycoside hydrolase, family 1 | Glycoside hydrolase, family 1, active site | Glycoside hydrolase, superfamily	NO
AT1G47915	6.13742	-2.06715	2.85955e-06	0.000126508	UP	F-box family protein	F-box family protein; CONTAINS InterPro DOMAIN/s: F-box domain, cyclin-like (InterPro:IPR001810), F-box domain, Skp2-like (InterPro:IPR022364); BEST Arabidopsis thaliana protein match is: F-box/RNI-like/FBD-like domains-containing protein (TAIR:AT1G48400.1)	F-box domain	NO
AT1G47920	6.00557	0.00756246	3.97827e-18	2.43622e-15	UP	RNI-like superfamily protein	RNI-like superfamily protein; CONTAINS InterPro DOMAIN/s: FBD-like (InterPro:IPR006566), Leucine-rich repeat 2 (InterPro:IPR013101); BEST Arabidopsis thaliana protein match is: F-box/RNI-like/FBD-like domains-containing protein (TAIR:AT1G48400.1)	FBD domain | Leucine-rich repeat 2	NO
AT1G47960	-0.803698	4.7132	0.00131313	0.0204567	DOWN	cell wall / vacuolar inhibitor of fructosidase 1	cell wall / vacuolar inhibitor of fructosidase 1 (C/VIF1); FUNCTIONS IN: enzyme inhibitor activity, pectinesterase inhibitor activity, pectinesterase activity; INVOLVED IN: biological_process unknown; LOCATED IN: cell wall; EXPRESSED IN: 22 plant structures; EXPRESSED DURING: 13 growth stages; CONTAINS InterPro DOMAIN/s: Pectinesterase inhibitor (InterPro:IPR006501); BEST Arabidopsis thaliana pro…	Pectinesterase inhibitor domain	NO
AT1G48060	2.68246	-1.22692	0.000282665	0.00590232	UP	F-box and associated interaction domains-containing protein	F-box and associated interaction domains-containing protein; CONTAINS InterPro DOMAIN/s: F-box domain, cyclin-like (InterPro:IPR001810), F-box domain, Skp2-like (InterPro:IPR022364), F-box associated domain, type 3 (InterPro:IPR013187), F-box associated interaction domain (InterPro:IPR017451); BEST Arabidopsis thaliana protein match is: F-box and associated interaction domains-containing protein …		NO
AT1G48110	0.850229	6.02557	0.000492123	0.00923923	UP	evolutionarily conserved C-terminal region 7	evolutionarily conserved C-terminal region 7 (ECT7); FUNCTIONS IN: molecular_function unknown; INVOLVED IN: biological_process unknown; LOCATED IN: cellular_component unknown; EXPRESSED IN: 24 plant structures; EXPRESSED DURING: 15 growth stages; CONTAINS InterPro DOMAIN/s: YTH domain (InterPro:IPR007275); BEST Arabidopsis thaliana protein match is: evolutionarily conserved C-terminal region 6 (T…	YTH domain	NO
AT1G48260	1.31121	2.50545	0.00364517	0.0468627	UP	CBL-interacting protein kinase 17	CBL-interacting protein kinase 17 (CIPK17); FUNCTIONS IN: protein serine/threonine kinase activity, protein kinase activity, kinase activity, ATP binding; INVOLVED IN: signal transduction, protein amino acid phosphorylation; LOCATED IN: cellular_component unknown; EXPRESSED IN: 9 plant structures; EXPRESSED DURING: LP.04 four leaves visible, 4 anthesis; CONTAINS InterPro DOMAIN/s: Protein kinase,…	NAF domain | NAF/FISL domain | Protein kinase domain | Protein kinase, ATP binding site | Protein kinase-like domain | Serine/threonine-protein kinase, active site | Serine/threonine/dual specificity protein kinase, catalytic domain	NO
AT1G48267	4.07449	0.445191	3.37215e-12	6.34511e-10	UP	MIR161; miRNA			NO
AT1G48370	1.26906	4.58134	1.39338e-06	6.81139e-05	UP	YELLOW STRIPE like 8	YELLOW STRIPE like 8 (YSL8); FUNCTIONS IN: oligopeptide transporter activity; INVOLVED IN: oligopeptide transport, transmembrane transport; LOCATED IN: plasma membrane; EXPRESSED IN: 22 plant structures; EXPRESSED DURING: 13 growth stages; CONTAINS InterPro DOMAIN/s: Oligopeptide transporter OPT superfamily (InterPro:IPR004813); BEST Arabidopsis thaliana protein match is: YELLOW STRIPE like 5 (TA…	Oligopeptide transporter, OPT superfamily	NO
AT1G48510	2.37266	0.790886	1.63055e-07	1.02079e-05	UP	Surfeit locus 1 cytochrome c oxidase biogenesis protein	Surfeit locus 1 cytochrome c oxidase biogenesis protein; FUNCTIONS IN: molecular_function unknown; INVOLVED IN: biological_process unknown; EXPRESSED IN: root; CONTAINS InterPro DOMAIN/s: Surfeit locus 1 (InterPro:IPR002994); BEST Arabidopsis thaliana protein match is: Surfeit locus 1 cytochrome c oxidase biogenesis protein (TAIR:AT3G17910.1)	Surfeit locus 1/Shy1	NO
AT1G48570	-1.05002	5.02273	0.000881165	0.0148764	DOWN	zinc finger (Ran-binding) family protein	zinc finger (Ran-binding) family protein; FUNCTIONS IN: binding, zinc ion binding; LOCATED IN: intracellular, chloroplast; EXPRESSED IN: 22 plant structures; EXPRESSED DURING: 13 growth stages; CONTAINS InterPro DOMAIN/s: Zinc finger, RanBP2-type (InterPro:IPR001876); BEST Arabidopsis thaliana protein match is: Ran BP2/NZF zinc finger-like superfamily protein (TAIR:AT1G70650.2)	Zinc finger, RanBP2-type	NO
AT1G48670	1.49644	-0.048316	0.000890621	0.015021	UP	auxin-responsive GH3 family protein	auxin-responsive GH3 family protein; CONTAINS InterPro DOMAIN/s: GH3 auxin-responsive promoter (InterPro:IPR004993); BEST Arabidopsis thaliana protein match is: Auxin-responsive GH3 family protein (TAIR:AT1G48660.1)	GH3 auxin-responsive promoter	NO
AT1G48700	3.14645	0.227595	5.99499e-09	5.41333e-07	UP	2-oxoglutarate (2OG) and Fe(II)-dependent oxygenase superfamily protein	2-oxoglutarate (2OG) and Fe(II)-dependent oxygenase superfamily protein; FUNCTIONS IN: oxidoreductase activity, acting on paired donors, with incorporation or reduction of molecular oxygen, L-ascorbic acid binding, iron ion binding; INVOLVED IN: oxidation reduction; LOCATED IN: cellular_component unknown; CONTAINS InterPro DOMAIN/s: Prolyl 4-hydroxylase, alpha subunit (InterPro:IPR006620); BEST A…	Prolyl 4-hydroxylase, alpha subunit	NO
AT1G48750	1.20282	5.5808	9.44842e-08	6.32669e-06	UP	Bifunctional inhibitor/lipid-transfer protein/seed storage 2S albumin superfamily protein	Bifunctional inhibitor/lipid-transfer protein/seed storage 2S albumin superfamily protein; FUNCTIONS IN: lipid binding; INVOLVED IN: lipid transport; LOCATED IN: endomembrane system; EXPRESSED IN: 22 plant structures; EXPRESSED DURING: 13 growth stages; CONTAINS InterPro DOMAIN/s: Bifunctional inhibitor/plant lipid transfer protein/seed storage (InterPro:IPR016140), Plant lipid transfer protein/s…	Bifunctional inhibitor/plant lipid transfer protein/seed storage helical domain	NO
AT1G49130	1.0621	5.61575	0.000170366	0.00387448	UP	B-box type zinc finger protein with CCT domain	B-box type zinc finger protein with CCT domain; FUNCTIONS IN: sequence-specific DNA binding transcription factor activity, zinc ion binding; INVOLVED IN: regulation of transcription; LOCATED IN: intracellular; CONTAINS InterPro DOMAIN/s: CCT domain (InterPro:IPR010402), Zinc finger, B-box (InterPro:IPR000315); BEST Arabidopsis thaliana protein match is: B-box type zinc finger protein with CCT dom…	CCT domain | Zinc finger, B-box	NO
AT1G49205	4.47648	-0.0411376	1.63944e-11	2.70677e-09	UP				NO
AT1G49210	-2.22937	1.85967	0.000159299	0.00366737	DOWN	RING/U-box superfamily protein	RING/U-box superfamily protein; FUNCTIONS IN: zinc ion binding; EXPRESSED IN: 9 plant structures; EXPRESSED DURING: LP.06 six leaves visible, 4 anthesis, LP.10 ten leaves visible, petal differentiation and expansion stage; CONTAINS InterPro DOMAIN/s: Zinc finger, RING-type (InterPro:IPR001841), Zinc finger, C3HC4 RING-type (InterPro:IPR018957); BEST Arabidopsis thaliana protein match is: RING/U-b…	Zinc finger, RING-type | Zinc finger, RING/FYVE/PHD-type	NO
AT1G49320	0.824113	4.14357	0.00288566	0.039143	UP	unknown seed protein like 1	unknown seed protein like 1 (USPL1); CONTAINS InterPro DOMAIN/s: BURP (InterPro:IPR004873); BEST Arabidopsis thaliana protein match is: BURP domain-containing protein (TAIR:AT5G25610.1)	BURP domain	NO
AT1G49390	1.52351	-0.20931	0.00150691	0.0228623	UP	2-oxoglutarate (2OG) and Fe(II)-dependent oxygenase superfamily protein	2-oxoglutarate (2OG) and Fe(II)-dependent oxygenase superfamily protein; FUNCTIONS IN: oxidoreductase activity, acting on paired donors, with incorporation or reduction of molecular oxygen, 2-oxoglutarate as one donor, and incorporation of one atom each of oxygen into both donors, oxidoreductase activity; INVOLVED IN: flavonoid biosynthetic process; LOCATED IN: cellular_component unknown; EXPRESS…	Isopenicillin N synthase-like | Non-haem dioxygenase N-terminal domain | Oxoglutarate/iron-dependent dioxygenase	NO
AT1G49475	2.34423	1.54524	1.14379e-06	5.72018e-05	UP	AP2/B3-like transcriptional factor family protein	AP2/B3-like transcriptional factor family protein; FUNCTIONS IN: DNA binding, sequence-specific DNA binding transcription factor activity; INVOLVED IN: regulation of transcription, DNA-dependent; LOCATED IN: cellular_component unknown; CONTAINS InterPro DOMAIN/s: Transcriptional factor B3 (InterPro:IPR003340); BEST Arabidopsis thaliana protein match is: AP2/B3-like transcriptional factor family p…	B3 DNA binding domain | DNA-binding pseudobarrel domain	NO
AT1G49530	1.06761	1.92406	0.00351292	0.0455773	UP	geranylgeranyl pyrophosphate synthase 6	geranylgeranyl pyrophosphate synthase 6 (GGPS6); CONTAINS InterPro DOMAIN/s: Polyprenyl synthetase-related (InterPro:IPR017446), Terpenoid synthase (InterPro:IPR008949), Polyprenyl synthetase (InterPro:IPR000092); BEST Arabidopsis thaliana protein match is: Terpenoid synthases superfamily protein (TAIR:AT3G20160.1)	Polyprenyl synthetase | Polyprenyl synthetase-related | Terpenoid synthase	NO
AT1G49570	2.25306	5.53654	0.000511261	0.00954533	UP	Peroxidase superfamily protein	Peroxidase superfamily protein; FUNCTIONS IN: peroxidase activity, heme binding; INVOLVED IN: oxidation reduction, response to oxidative stress; LOCATED IN: endomembrane system; EXPRESSED IN: leaf lamina base, leaf whorl, hypocotyl, sepal, root; EXPRESSED DURING: 4 anthesis; CONTAINS InterPro DOMAIN/s: Haem peroxidase (InterPro:IPR010255), Plant peroxidase (InterPro:IPR000823), Peroxidases heam-l…	Haem peroxidase | Haem peroxidase, plant/fungal/bacterial | Peroxidase, active site | Peroxidases heam-ligand binding site | Plant peroxidase	NO
AT1G49610	3.856	-2.32812	0.000702716	0.0123619	UP	F-box family protein	F-box family protein; CONTAINS InterPro DOMAIN/s: F-box domain, Skp2-like (InterPro:IPR022364); BEST Arabidopsis thaliana protein match is: RNI-like superfamily protein (TAIR:AT3G18150.1)		NO
AT1G49730	0.981904	5.71961	0.000899617	0.0151465	UP	Protein kinase superfamily protein	Protein kinase superfamily protein; FUNCTIONS IN: kinase activity; INVOLVED IN: protein amino acid phosphorylation; LOCATED IN: plasma membrane; EXPRESSED IN: 20 plant structures; EXPRESSED DURING: 13 growth stages; CONTAINS InterPro DOMAIN/s: Protein kinase, ATP binding site (InterPro:IPR017441), Protein kinase, catalytic domain (InterPro:IPR000719), Serine-threonine/tyrosine-protein kinase (Int…	Concanavalin A-like lectin/glucanase, subgroup | Protein kinase domain | Protein kinase, ATP binding site | Protein kinase-like domain | Serine/threonine-protein kinase, active site	NO
AT1G49790	-1.46177	-0.16498	0.00310768	0.041437	DOWN	F-box associated ubiquitination effector family protein	F-box associated ubiquitination effector family protein; FUNCTIONS IN: molecular_function unknown; INVOLVED IN: biological_process unknown; LOCATED IN: cellular_component unknown; EXPRESSED IN: 20 plant structures; EXPRESSED DURING: 10 growth stages; CONTAINS InterPro DOMAIN/s: F-box associated domain, type 1 (InterPro:IPR006527), F-box associated interaction domain (InterPro:IPR017451); BEST Ara…		NO
AT1G49800	-4.52479	-1.84831	0.00127652	0.0200347	DOWN		unknown protein; FUNCTIONS IN: molecular_function unknown; INVOLVED IN: biological_process unknown; LOCATED IN: endomembrane system; EXPRESSED IN: sepal, male gametophyte, stamen; EXPRESSED DURING: 4 anthesis		NO
AT1G49810	3.40276	-1.65909	5.97307e-05	0.00163484	UP	Na+/H+ antiporter 2	Na+/H+ antiporter 2 (NHD2); FUNCTIONS IN: potassium:hydrogen antiporter activity, sodium:hydrogen antiporter activity; INVOLVED IN: sodium ion transport; LOCATED IN: endomembrane system, integral to membrane; CONTAINS InterPro DOMAIN/s: Na+/H+ antiporter NhaD-like (InterPro:IPR018390), Divalent ion symporter (InterPro:IPR004680); BEST Arabidopsis thaliana protein match is: sodium:hydrogen antipor…	Citrate transporter-like domain	NO
AT1G49832	-1.53086	-0.448093	0.00396306	0.0499572	DOWN				NO
AT1G49850	0.899783	5.0242	4.66408e-05	0.00132903	UP	RING/U-box superfamily protein	RING/U-box superfamily protein; FUNCTIONS IN: zinc ion binding; EXPRESSED IN: 22 plant structures; EXPRESSED DURING: 13 growth stages; CONTAINS InterPro DOMAIN/s: Zinc finger, RING-type (InterPro:IPR001841), Zinc finger, C3HC4 RING-type (InterPro:IPR018957); BEST Arabidopsis thaliana protein match is: RING/U-box superfamily protein (TAIR:AT2G15580.1)	Zinc finger, RING-type | Zinc finger, RING/FYVE/PHD-type	NO
AT1G49910	2.02215	2.28215	7.51691e-09	6.59315e-07	UP	Transducin/WD40 repeat-like superfamily protein	BUB (BUDDING UNINHIBITED BY BENZYMIDAZOL) 3.2 (BUB3.2); CONTAINS InterPro DOMAIN/s: WD40 repeat-like-containing domain (InterPro:IPR011046), WD40 repeat 2 (InterPro:IPR019782), WD40-repeat-containing domain (InterPro:IPR017986), WD40 repeat (InterPro:IPR001680), WD40/YVTN repeat-like-containing domain (InterPro:IPR015943), WD40 repeat, subgroup (InterPro:IPR019781), G-protein beta WD-40 repeat, r…	G-protein beta WD-40 repeat | WD40 repeat | WD40-repeat-containing domain | WD40/YVTN repeat-like-containing domain	NO
AT1G49960	1.61426	1.53835	2.51756e-05	0.000797313	UP	Xanthine/uracil permease family protein	Xanthine/uracil permease family protein; FUNCTIONS IN: transmembrane transporter activity; INVOLVED IN: transport, transmembrane transport; LOCATED IN: membrane; EXPRESSED IN: 9 plant structures; EXPRESSED DURING: 4 anthesis, petal differentiation and expansion stage, D bilateral stage; CONTAINS InterPro DOMAIN/s: Xanthine/uracil/vitamin C permease (InterPro:IPR006043); BEST Arabidopsis thaliana …	Xanthine/uracil/vitamin C permease	NO
AT1G50060	2.33315	3.06226	2.10682e-08	1.6388e-06	UP	CAP (Cysteine-rich secretory proteins, Antigen 5, and Pathogenesis-related 1 protein) superfamily protein	CAP (Cysteine-rich secretory proteins, Antigen 5, and Pathogenesis-related 1 protein) superfamily protein; FUNCTIONS IN: molecular_function unknown; INVOLVED IN: biological_process unknown; LOCATED IN: endomembrane system, extracellular region; EXPRESSED IN: root; CONTAINS InterPro DOMAIN/s: Allergen V5/Tpx-1 related (InterPro:IPR001283), Ves allergen (InterPro:IPR002413), SCP-like extracellular …	CAP domain | Cysteine-rich secretory protein, allergen V5/Tpx-1-related | Ves allergen	NO
AT1G50090	3.71652	-0.623551	6.27988e-07	3.406e-05	UP	D-aminoacid aminotransferase-like PLP-dependent enzymes superfamily protein	D-aminoacid aminotransferase-like PLP-dependent enzymes superfamily protein; FUNCTIONS IN: branched-chain-amino-acid transaminase activity, catalytic activity; INVOLVED IN: branched chain family amino acid metabolic process, metabolic process; LOCATED IN: cellular_component unknown; EXPRESSED IN: root; CONTAINS InterPro DOMAIN/s: Aminotransferase, class IV (InterPro:IPR001544), Aminotransferase, …	Aminotransferase, class IV | Aminotransferase, class IV, conserved site | Branched-chain amino acid aminotransferase II	NO
AT1G50520	1.08061	2.38309	0.00110624	0.0178854	UP	cytochrome P450, family 705, subfamily A, polypeptide 27	cytochrome P450, family 705, subfamily A, polypeptide 27 (CYP705A27); FUNCTIONS IN: electron carrier activity, monooxygenase activity, iron ion binding, oxygen binding, heme binding; INVOLVED IN: oxidation reduction; LOCATED IN: endomembrane system; EXPRESSED IN: root; CONTAINS InterPro DOMAIN/s: Cytochrome P450 (InterPro:IPR001128), Cytochrome P450, conserved site (InterPro:IPR017972), Cytochrom…	Cytochrome P450 | Cytochrome P450, E-class, group I | Cytochrome P450, conserved site	YES	1:18719574:T-A;protein_coding;missense;CTC>CAC;L>H
AT1G50750	-3.24872	-1.68675	8.80592e-05	0.00225032	DOWN	Plant mobile domain protein family	Plant mobile domain protein family; CONTAINS InterPro DOMAIN/s: Aminotransferase-like, plant mobile domain (InterPro:IPR019557); BEST Arabidopsis thaliana protein match is: Plant mobile domain protein family (TAIR:AT1G50790.1)	Aminotransferase-like, plant mobile domain | Protein of unknown function DUF716 (TMEM45)	NO
AT1G50950	1.12812	3.49007	8.0212e-05	0.00207338	UP	Thioredoxin protein with domain of unknown function (DUF1692)	INVOLVED IN: cell redox homeostasis; EXPRESSED IN: 20 plant structures; EXPRESSED DURING: 11 growth stages; CONTAINS InterPro DOMAIN/s: Thioredoxin fold (InterPro:IPR012335), Thioredoxin-like (InterPro:IPR017936), Thioredoxin-like fold (InterPro:IPR012336), Thioredoxin domain (InterPro:IPR013766), Protein of unknown function DUF1692 (InterPro:IPR012936); BEST Arabidopsis thaliana protein match is…	Endoplasmic reticulum vesicle transporter, C-terminal | Thioredoxin domain | Thioredoxin-like fold	NO
AT1G51190	2.21001	0.61257	2.44543e-05	0.000778491	UP	Integrase-type DNA-binding superfamily protein	PLETHORA 2 (PLT2); CONTAINS InterPro DOMAIN/s: DNA-binding, integrase-type (InterPro:IPR016177), Pathogenesis-related transcriptional factor/ERF, DNA-binding (InterPro:IPR001471); BEST Arabidopsis thaliana protein match is: Integrase-type DNA-binding superfamily protein (TAIR:AT3G20840.1)	AP2/ERF domain | DNA-binding domain	NO
AT1G51420	1.54408	2.84677	9.55506e-06	0.000354577	UP	sucrose-phosphatase 1	sucrose-phosphatase 1 (SPP1); FUNCTIONS IN: phosphatase activity, magnesium ion binding, sucrose-phosphatase activity, catalytic activity; INVOLVED IN: sucrose biosynthetic process, metabolic process; LOCATED IN: plasma membrane; EXPRESSED IN: petal, leaf whorl, root, flower, cultured cell; EXPRESSED DURING: 4 anthesis, petal differentiation and expansion stage; CONTAINS InterPro DOMAIN/s: Sucros…	HAD-like domain | HAD-superfamily hydrolase, subfamily IIB | Sucrose phosphatase, plant/cyanobacteria | Sucrose-6-phosphate phosphohydrolase C-terminal | Sucrose-phosphate phosphatase | Sucrose-phosphate synthase	NO
AT1G51470	1.90673	3.24937	6.74749e-08	4.6955e-06	UP	beta glucosidase 35	beta glucosidase 35 (BGLU35); FUNCTIONS IN: thioglucosidase activity, beta-glucosidase activity, hydrolase activity, hydrolyzing O-glycosyl compounds; INVOLVED IN: response to salt stress; LOCATED IN: endomembrane system; EXPRESSED IN: root; CONTAINS InterPro DOMAIN/s: Glycoside hydrolase, family 1 (InterPro:IPR001360), Glycoside hydrolase, family 1, active site (InterPro:IPR018120), Glycoside hy…		NO
AT1G51640	1.77239	0.333028	0.000180797	0.0040732	UP	exocyst subunit exo70 family protein G2	exocyst subunit exo70 family protein G2 (EXO70G2); INVOLVED IN: exocytosis, vesicle docking involved in exocytosis; LOCATED IN: exocyst; EXPRESSED IN: hypocotyl, root, flower; EXPRESSED DURING: 4 anthesis; CONTAINS InterPro DOMAIN/s: Exo70 exocyst complex subunit (InterPro:IPR004140); BEST Arabidopsis thaliana protein match is: exocyst subunit exo70 family protein G1 (TAIR:AT4G31540.1)	Cullin repeat-like-containing domain | Exocyst complex protein Exo70	NO
AT1G51770	3.76587	-1.0756	3.42881e-07	1.99802e-05	UP	Core-2/I-branching beta-1,6-N-acetylglucosaminyltransferase family protein	Core-2/I-branching beta-1,6-N-acetylglucosaminyltransferase family protein; FUNCTIONS IN: molecular_function unknown; INVOLVED IN: biological_process unknown; LOCATED IN: cellular_component unknown; CONTAINS InterPro DOMAIN/s: Core-2/I-Branching enzyme (InterPro:IPR021141); BEST Arabidopsis thaliana protein match is: Core-2/I-branching beta-1,6-N-acetylglucosaminyltransferase family protein (TAIR…	Glycosyl transferase, family 14	NO
AT1G51800	1.47871	3.27424	2.66641e-05	0.000837394	UP	Leucine-rich repeat protein kinase family protein	Leucine-rich repeat protein kinase family protein; FUNCTIONS IN: kinase activity; INVOLVED IN: protein amino acid phosphorylation; LOCATED IN: endomembrane system; EXPRESSED IN: 11 plant structures; EXPRESSED DURING: 6 growth stages; CONTAINS InterPro DOMAIN/s: Protein kinase, ATP binding site (InterPro:IPR017441), Protein kinase, catalytic domain (InterPro:IPR000719), Serine/threonine-protein ki…	Concanavalin A-like lectin/glucanase, subgroup | Leucine rich repeat 4 | Malectin-like carbohydrate-binding domain | Protein kinase domain | Protein kinase, ATP binding site | Protein kinase-like domain | Serine/threonine-protein kinase, active site	NO
AT1G51870	1.79781	-0.743369	0.00137969	0.0213017	UP	protein kinase family protein	protein kinase family protein; FUNCTIONS IN: protein serine/threonine kinase activity, protein kinase activity, kinase activity, ATP binding; INVOLVED IN: protein amino acid phosphorylation; LOCATED IN: endomembrane system; CONTAINS InterPro DOMAIN/s: Protein kinase, ATP binding site (InterPro:IPR017441), Serine/threonine-protein kinase domain (InterPro:IPR002290), Serine-threonine/tyrosine-prote…	Concanavalin A-like lectin/glucanase, subgroup | Malectin-like carbohydrate-binding domain | Protein kinase domain | Protein kinase, ATP binding site | Protein kinase-like domain | Serine-threonine/tyrosine-protein kinase catalytic domain | Serine/threonine-protein kinase, active site	NO
AT1G51890	-1.59959	-0.36967	0.00252481	0.0350027	DOWN	Leucine-rich repeat protein kinase family protein	Leucine-rich repeat protein kinase family protein; FUNCTIONS IN: kinase activity; INVOLVED IN: protein amino acid phosphorylation; LOCATED IN: endomembrane system; EXPRESSED IN: 9 plant structures; EXPRESSED DURING: 8 growth stages; CONTAINS InterPro DOMAIN/s: Protein kinase, ATP binding site (InterPro:IPR017441), Protein kinase, catalytic domain (InterPro:IPR000719), Serine/threonine-protein kin…	Concanavalin A-like lectin/glucanase, subgroup | Leucine-rich repeat | Malectin-like carbohydrate-binding domain | Protein kinase domain | Protein kinase, ATP binding site | Protein kinase-like domain | Serine/threonine-protein kinase, active site	NO
AT1G51960	2.37483	-1.08209	0.000428566	0.00826247	UP	IQ-domain 27	IQ-domain 27 (IQD27); CONTAINS InterPro DOMAIN/s: IQ calmodulin-binding region (InterPro:IPR000048); BEST Arabidopsis thaliana protein match is: IQ-domain 26 (TAIR:AT3G16490.1)	Domain of unknown function DUF4005 | IQ motif, EF-hand binding site | P-loop containing nucleoside triphosphate hydrolase	NO
AT1G52050	2.20664	2.2548	1.40733e-08	1.1367e-06	UP	Mannose-binding lectin superfamily protein	Mannose-binding lectin superfamily protein; FUNCTIONS IN: molecular_function unknown; INVOLVED IN: biological_process unknown; LOCATED IN: endomembrane system; EXPRESSED IN: 7 plant structures; EXPRESSED DURING: 4 anthesis, E expanded cotyledon stage; CONTAINS InterPro DOMAIN/s: Mannose-binding lectin (InterPro:IPR001229); BEST Arabidopsis thaliana protein match is: Mannose-binding lectin superfa…	Mannose-binding lectin	NO
AT1G52060	1.68928	3.38048	3.15712e-07	1.859e-05	UP	Mannose-binding lectin superfamily protein	Mannose-binding lectin superfamily protein; FUNCTIONS IN: molecular_function unknown; INVOLVED IN: biological_process unknown; LOCATED IN: endomembrane system; EXPRESSED IN: root; CONTAINS InterPro DOMAIN/s: Mannose-binding lectin (InterPro:IPR001229); BEST Arabidopsis thaliana protein match is: Mannose-binding lectin superfamily protein (TAIR:AT1G52070.1)	Mannose-binding lectin	NO
AT1G52070	2.13317	4.93911	7.49156e-10	8.48398e-08	UP	Mannose-binding lectin superfamily protein	Mannose-binding lectin superfamily protein; FUNCTIONS IN: molecular_function unknown; INVOLVED IN: biological_process unknown; LOCATED IN: endomembrane system; EXPRESSED IN: root; CONTAINS InterPro DOMAIN/s: Mannose-binding lectin (InterPro:IPR001229); BEST Arabidopsis thaliana protein match is: Mannose-binding lectin superfamily protein (TAIR:AT1G52060.1)	Mannose-binding lectin	NO
AT1G52100	1.04453	7.07821	1.97699e-05	0.000656028	UP	Mannose-binding lectin superfamily protein	Mannose-binding lectin superfamily protein; FUNCTIONS IN: molecular_function unknown; INVOLVED IN: biological_process unknown; EXPRESSED IN: shoot, hypocotyl; LOCATED IN: membrane; CONTAINS InterPro DOMAIN/s: Mannose-binding lectin (InterPro:IPR001229); EXPRESSED IN: shoot, cotyledon, hypocotyl, leaf; BEST Arabidopsis thaliana protein match is: Mannose-binding lectin superfamily protein (TAIR:AT5…	Mannose-binding lectin	YES	1:19383685:A-AC;splice_donor_variant,1:19383685:A-AC;exonic_variant&protein_coding
AT1G52120	3.16306	-1.27325	0.000160455	0.00368894	UP	Mannose-binding lectin superfamily protein	Mannose-binding lectin superfamily protein; CONTAINS InterPro DOMAIN/s: Mannose-binding lectin (InterPro:IPR001229); BEST Arabidopsis thaliana protein match is: Mannose-binding lectin superfamily protein (TAIR:AT1G52130.1)	Mannose-binding lectin	NO
AT1G52240	2.55692	-0.594509	6.38632e-06	0.000253056	UP	RHO guanyl-nucleotide exchange factor 11	RHO guanyl-nucleotide exchange factor 11 (ROPGEF11); CONTAINS InterPro DOMAIN/s: Dynein light chain, type 1/2 (InterPro:IPR001372); CONTAINS InterPro DOMAIN/s: Rop nucleotide exchanger, PRONE (InterPro:IPR005512), Dynein light chain, type 1/2 (InterPro:IPR001372); BEST Arabidopsis thaliana protein match is: Dynein light chain type 1 family protein (TAIR:AT3G16120.1); BEST Arabidopsis thaliana pro…	Dynein light chain, type 1/2	NO
AT1G52330	1.45429	1.35932	0.00108254	0.0176054	UP	Late embryogenesis abundant (LEA) hydroxyproline-rich glycoprotein family	Late embryogenesis abundant (LEA) hydroxyproline-rich glycoprotein family; FUNCTIONS IN: molecular_function unknown; INVOLVED IN: biological_process unknown; LOCATED IN: cellular_component unknown; CONTAINS InterPro DOMAIN/s: Late embryogenesis abundant protein, group 2 (InterPro:IPR004864); BEST Arabidopsis thaliana protein match is: Late embryogenesis abundant (LEA) hydroxyproline-rich glycopro…	Late embryogenesis abundant protein, LEA-14	NO
AT1G52343	1.66774	1.68094	1.31512e-05	0.000463817	UP		unknown protein; BEST Arabidopsis thaliana protein match is: unknown protein (TAIR:AT4G32680.1)		NO
AT1G52370	0.705295	4.85061	0.00174329	0.0256846	UP	Ribosomal protein L22p/L17e family protein	Ribosomal protein L22p/L17e family protein; FUNCTIONS IN: structural constituent of ribosome; INVOLVED IN: translation; LOCATED IN: ribosome, intracellular, large ribosomal subunit; CONTAINS InterPro DOMAIN/s: Ribosomal protein L22/L17 (InterPro:IPR001063), Ribosomal protein L22, bacterial-type (InterPro:IPR005727); BEST Arabidopsis thaliana protein match is: Ribosomal protein L22p/L17e family pr…	Ribosomal protein L22, bacterial/chloroplast-type | Ribosomal protein L22/L17	NO
AT1G52540	0.732022	4.10566	0.00376004	0.0480068	UP	Protein kinase superfamily protein	Protein kinase superfamily protein; FUNCTIONS IN: protein tyrosine kinase activity, protein kinase activity, kinase activity, ATP binding; INVOLVED IN: protein amino acid phosphorylation; LOCATED IN: plasma membrane; EXPRESSED IN: 23 plant structures; EXPRESSED DURING: 13 growth stages; CONTAINS InterPro DOMAIN/s: Protein kinase, ATP binding site (InterPro:IPR017441), Protein kinase, catalytic do…	Protein kinase domain | Protein kinase, ATP binding site | Protein kinase-like domain | Serine-threonine/tyrosine-protein kinase catalytic domain | Tyrosine-protein kinase, active site	NO
AT1G52618	2.49486	-1.99363	0.00358146	0.046306	UP		unknown protein		NO
AT1G52660	2.81911	1.25328	6.20332e-09	5.57157e-07	UP	P-loop containing nucleoside triphosphate hydrolases superfamily protein	P-loop containing nucleoside triphosphate hydrolases superfamily protein; FUNCTIONS IN: ATP binding; INVOLVED IN: defense response, apoptosis; EXPRESSED IN: root; CONTAINS InterPro DOMAIN/s: NB-ARC (InterPro:IPR002182), Disease resistance protein (InterPro:IPR000767); BEST Arabidopsis thaliana protein match is: P-loop containing nucleoside triphosphate hydrolases superfamily protein (TAIR:AT3G157…		NO
AT1G52690	-4.97807	6.40154	0.000129109	0.00308856	DOWN	Late embryogenesis abundant protein (LEA) family protein	Late embryogenesis abundant protein (LEA) family protein; BEST Arabidopsis thaliana protein match is: Late embryogenesis abundant protein (LEA) family protein (TAIR:AT3G15670.1)		NO
AT1G52700	1.33015	2.55378	0.000213866	0.0046896	UP	alpha/beta-Hydrolases superfamily protein	alpha/beta-Hydrolases superfamily protein; FUNCTIONS IN: hydrolase activity, carboxylesterase activity; INVOLVED IN: biological_process unknown; EXPRESSED IN: 11 plant structures; EXPRESSED DURING: 7 growth stages; CONTAINS InterPro DOMAIN/s: Phospholipase/carboxylesterase (InterPro:IPR003140); BEST Arabidopsis thaliana protein match is: alpha/beta-Hydrolases superfamily protein (TAIR:AT3G15650.2)	Alpha/Beta hydrolase fold | Phospholipase/carboxylesterase/thioesterase	NO
AT1G52890	-1.15253	5.26477	0.000344789	0.00694132	DOWN	NAC domain containing protein 19	NAC domain containing protein 19 (NAC019); CONTAINS InterPro DOMAIN/s: No apical meristem (NAM) protein (InterPro:IPR003441); BEST Arabidopsis thaliana protein match is: NAC domain containing protein 3 (TAIR:AT3G15500.1)	NAC domain	NO
AT1G53090	1.29411	5.30871	7.26801e-07	3.87946e-05	UP	SPA1-related 4	SPA1-related 4 (SPA4); FUNCTIONS IN: protein binding, signal transducer activity; INVOLVED IN: protein amino acid phosphorylation; LOCATED IN: CUL4 RING ubiquitin ligase complex, heterotrimeric G-protein complex; EXPRESSED IN: 19 plant structures; EXPRESSED DURING: 11 growth stages; CONTAINS InterPro DOMAIN/s: WD40 repeat 2 (InterPro:IPR019782), WD40 repeat, conserved site (InterPro:IPR019775), W…	G-protein beta WD-40 repeat | Protein kinase domain | Protein kinase-like domain | WD40 repeat | WD40 repeat, conserved site | WD40-repeat-containing domain | WD40/YVTN repeat-like-containing domain	NO
AT1G53110	1.45983	4.49316	7.80044e-09	6.78881e-07	UP		BEST Arabidopsis thaliana protein match is: proton pump interactor 2 (TAIR:AT3G15340.1)	Proton pump-interactor	NO
AT1G53130	3.13598	1.33288	1.95545e-08	1.52457e-06	UP	Stigma-specific Stig1 family protein	GRIM REAPER (GRI); CONTAINS InterPro DOMAIN/s: Stigma-specific protein Stig1 (InterPro:IPR006969); BEST Arabidopsis thaliana protein match is: Stigma-specific Stig1 family protein (TAIR:AT4G26880.1)	Stigma-specific protein Stig1	NO
AT1G53270	2.02804	0.638811	2.02125e-05	0.000667492	UP	ABC-2 type transporter family protein	ABC-2 type transporter family protein; FUNCTIONS IN: ATPase activity, coupled to transmembrane movement of substances; LOCATED IN: membrane; EXPRESSED IN: root; CONTAINS InterPro DOMAIN/s: ATPase, AAA+ type, core (InterPro:IPR003593), ABC transporter-like (InterPro:IPR003439), ABC-2 type transporter (InterPro:IPR013525), ABC transporter, conserved site (InterPro:IPR017871); BEST Arabidopsis thali…	AAA+ ATPase domain | ABC transporter, conserved site | ABC transporter-like | ABC-2 type transporter | P-loop containing nucleoside triphosphate hydrolase	NO
AT1G53345	1.46804	2.82459	2.70348e-06	0.000120285	UP		unknown protein; INVOLVED IN: biological_process unknown; LOCATED IN: endomembrane system; EXPRESSED IN: 8 plant structures; EXPRESSED DURING: 4 anthesis, F mature embryo stage, petal differentiation and expansion stage, E expanded cotyledon stage, D bilateral stage; BEST Arabidopsis thaliana protein match is: unknown protein (TAIR:AT5G09580.1)		NO
AT1G53350	1.1794	4.50076	5.69498e-06	0.000228894	UP	Disease resistance protein (CC-NBS-LRR class) family	Disease resistance protein (CC-NBS-LRR class) family; FUNCTIONS IN: ATP binding; INVOLVED IN: apoptosis, defense response; EXPRESSED IN: 19 plant structures; EXPRESSED DURING: 9 growth stages; CONTAINS InterPro DOMAIN/s: NB-ARC (InterPro:IPR002182), Disease resistance protein (InterPro:IPR000767); BEST Arabidopsis thaliana protein match is: Disease resistance protein (CC-NBS-LRR class) family (TA…		NO
AT1G53430	-1.05239	5.53635	2.55273e-05	0.000805798	DOWN	Leucine-rich repeat transmembrane protein kinase	Leucine-rich repeat transmembrane protein kinase; FUNCTIONS IN: kinase activity; INVOLVED IN: protein amino acid phosphorylation; LOCATED IN: plasma membrane; EXPRESSED IN: 23 plant structures; EXPRESSED DURING: 13 growth stages; CONTAINS InterPro DOMAIN/s: Serine/threonine-protein kinase domain (InterPro:IPR002290), Leucine-rich repeat (InterPro:IPR001611), Serine-threonine/tyrosine-protein kina…	Concanavalin A-like lectin/glucanase, subgroup | Leucine-rich repeat | Malectin | Protein kinase domain | Protein kinase-like domain | Serine-threonine/tyrosine-protein kinase catalytic domain | Serine/threonine-protein kinase, active site	NO
AT1G53440	-0.725571	6.00131	0.0029759	0.0400284	DOWN	Leucine-rich repeat transmembrane protein kinase	Leucine-rich repeat transmembrane protein kinase; FUNCTIONS IN: kinase activity; INVOLVED IN: protein amino acid phosphorylation; LOCATED IN: plasma membrane; EXPRESSED IN: 22 plant structures; EXPRESSED DURING: 13 growth stages; CONTAINS InterPro DOMAIN/s: Serine/threonine-protein kinase domain (InterPro:IPR002290), Leucine-rich repeat (InterPro:IPR001611), Serine-threonine/tyrosine-protein kina…	Concanavalin A-like lectin/glucanase, subgroup | Leucine-rich repeat | Malectin | Protein kinase domain | Protein kinase-like domain | Serine-threonine/tyrosine-protein kinase catalytic domain | Serine/threonine-protein kinase, active site	NO
AT1G53450	-0.796237	5.20419	0.000536589	0.0099356	DOWN		unknown protein; BEST Arabidopsis thaliana protein match is: unknown protein (TAIR:AT3G14830.2)		NO
AT1G53470	0.903787	4.6863	0.000123408	0.00297318	UP	mechanosensitive channel of small conductance-like 4	mechanosensitive channel of small conductance-like 4 (MSL4); INVOLVED IN: transmembrane transport; LOCATED IN: plasma membrane, membrane; CONTAINS InterPro DOMAIN/s: Membrane protein, At2g17000, predicted (InterPro:IPR016688), Mechanosensitive ion channel MscS (InterPro:IPR006685), Like-Sm ribonucleoprotein (LSM)-related domain (InterPro:IPR010920); BEST Arabidopsis thaliana protein match is: mec…	Like-Sm (LSM) domain | Mechanosensitive ion channel MscS | Mechanosensitive ion channel MscS-like, plants/fungi	NO
AT1G53633	1.7041	0.267159	7.75373e-05	0.00201507	UP		unknown protein; FUNCTIONS IN: molecular_function unknown; INVOLVED IN: biological_process unknown; LOCATED IN: cellular_component unknown		NO
AT1G53680	1.80231	1.59589	5.80202e-06	0.00023264	UP	glutathione S-transferase TAU 28	glutathione S-transferase TAU 28 (GSTU28); FUNCTIONS IN: glutathione transferase activity; INVOLVED IN: response to cadmium ion, toxin catabolic process; LOCATED IN: cytoplasm; EXPRESSED IN: 7 plant structures; EXPRESSED DURING: 4 anthesis, LP.10 ten leaves visible, petal differentiation and expansion stage; CONTAINS InterPro DOMAIN/s: Thioredoxin fold (InterPro:IPR012335), Glutathione S-transfer…	Glutathione S-transferase, C-terminal | Glutathione S-transferase, C-terminal-like | Glutathione S-transferase, N-terminal | Thioredoxin-like fold	NO
AT1G53830	1.81762	3.87223	9.97943e-10	1.08776e-07	UP	pectin methylesterase 2	pectin methylesterase 2 (PME2); FUNCTIONS IN: pectinesterase activity; INVOLVED IN: cell wall modification; LOCATED IN: extracellular region, plant-type cell wall; EXPRESSED IN: sepal, flower, root, carpel; EXPRESSED DURING: 4 anthesis, petal differentiation and expansion stage; CONTAINS InterPro DOMAIN/s: Pectinesterase, active site (InterPro:IPR018040), Pectin lyase fold/virulence factor (Inter…	Pectin lyase fold | Pectin lyase fold/virulence factor | Pectinesterase inhibitor domain | Pectinesterase, active site | Pectinesterase, catalytic	NO
AT1G53875	-4.83062	0.429464	1.10967e-12	2.29293e-10	DOWN				NO
AT1G53880	0.914691	3.86543	0.000744895	0.0129324	UP	Eukaryotic translation initiation factor 2B (eIF-2B) family protein	Eukaryotic translation initiation factor 2B (eIF-2B) family protein; FUNCTIONS IN: GTP binding, translation initiation factor activity; INVOLVED IN: translational initiation, cellular metabolic process; LOCATED IN: eukaryotic translation initiation factor 2B complex; CONTAINS InterPro DOMAIN/s: Initiation factor 2B related (InterPro:IPR000649), Protein of unknown function DUF567 (InterPro:IPR0076…	Initiation factor 2B-related | LURP1-like domain | Tubby C-terminal-like domain	NO
AT1G53940	-2.23566	-0.422058	0.00149429	0.0227015	DOWN	GDSL-motif lipase 2	GDSL-motif lipase 2 (GLIP2); FUNCTIONS IN: lipase activity, arylesterase activity, carboxylesterase activity; INVOLVED IN: response to jasmonic acid stimulus, response to ethylene stimulus, defense response to bacterium, response to salicylic acid stimulus; LOCATED IN: endomembrane system; EXPRESSED IN: seedling, stem, cotyledon, hypocotyl, root; CONTAINS InterPro DOMAIN/s: Lipase, GDSL, active s…		NO
AT1G53990	-1.99677	-0.398159	0.000313763	0.00643205	DOWN	GDSL-motif lipase 3	GDSL-motif lipase 3 (GLIP3); FUNCTIONS IN: lipase activity, carboxylesterase activity; INVOLVED IN: glycerol biosynthetic process, lipid metabolic process; LOCATED IN: endomembrane system; EXPRESSED IN: root; CONTAINS InterPro DOMAIN/s: Lipase, GDSL, active site (InterPro:IPR008265), Lipase, GDSL (InterPro:IPR001087), Esterase, SGNH hydrolase-type (InterPro:IPR013830); BEST Arabidopsis thaliana p…	Lipase, GDSL | Lipase, GDSL, active site | SGNH hydrolase-type esterase domain	NO
AT1G54000	1.07712	4.91052	0.00104908	0.017189	UP	GDSL-like Lipase/Acylhydrolase superfamily protein	GDSL-like Lipase/Acylhydrolase superfamily protein; FUNCTIONS IN: lipase activity, hydrolase activity, acting on ester bonds, carboxylesterase activity; INVOLVED IN: lipid metabolic process; LOCATED IN: vacuolar membrane, plasma membrane, vacuole, plant-type cell wall, plant-type vacuole; EXPRESSED IN: stem, cultured cell, callus; EXPRESSED DURING: seedling growth; CONTAINS InterPro DOMAIN/s: Lip…	Lipase, GDSL | SGNH hydrolase-type esterase domain	NO
AT1G54010	-0.805053	5.66058	0.00371326	0.0475718	DOWN	GDSL-like Lipase/Acylhydrolase superfamily protein	GDSL-like Lipase/Acylhydrolase superfamily protein; FUNCTIONS IN: hydrolase activity, acting on ester bonds, carboxylesterase activity; INVOLVED IN: lipid metabolic process; LOCATED IN: plasma membrane, vacuole, membrane; EXPRESSED IN: cultured cell, leaf; EXPRESSED DURING: seedling growth; CONTAINS InterPro DOMAIN/s: Lipase, GDSL (InterPro:IPR001087); BEST Arabidopsis thaliana protein match is: …	Lipase, GDSL | SGNH hydrolase-type esterase domain	NO
AT1G54280	-2.36924	-1.25816	0.000176486	0.00399209	DOWN	ATPase E1-E2 type family protein / haloacid dehalogenase-like hydrolase family protein	ATPase E1-E2 type family protein / haloacid dehalogenase-like hydrolase family protein; FUNCTIONS IN: zinc ion binding, ATPase activity, coupled to transmembrane movement of ions, phosphorylative mechanism; INVOLVED IN: metabolic process, phospholipid transport, ATP biosynthetic process; LOCATED IN: integral to membrane, membrane; EXPRESSED IN: 8 plant structures; EXPRESSED DURING: L mature polle…	Cation-transporting P-type ATPase, subfamily IV | Cation-transporting P-type ATPase | HAD-like domain | P-type ATPase, A domain | P-type ATPase, cytoplasmic domain N | P-type ATPase, phosphorylation site	NO
AT1G54330	2.07703	-0.44587	5.64566e-05	0.0015599	UP	NAC domain containing protein 20	NAC domain containing protein 20 (NAC020); FUNCTIONS IN: sequence-specific DNA binding transcription factor activity; INVOLVED IN: multicellular organismal development, regulation of transcription; LOCATED IN: cellular_component unknown; CONTAINS InterPro DOMAIN/s: No apical meristem (NAM) protein (InterPro:IPR003441); BEST Arabidopsis thaliana protein match is: NAC domain containing protein 28 (…	NAC domain	YES	1:20279624:TA-T;exonic_variant
AT1G54510	0.766016	5.06344	0.000671146	0.0119161	UP	NIMA-related serine/threonine kinase 1	NIMA-related serine/threonine kinase 1 (NEK1); FUNCTIONS IN: protein serine/threonine kinase activity, protein kinase activity, kinase activity, ATP binding; INVOLVED IN: protein amino acid phosphorylation; LOCATED IN: cellular_component unknown; EXPRESSED IN: 18 plant structures; EXPRESSED DURING: 7 growth stages; CONTAINS InterPro DOMAIN/s: Protein kinase, ATP binding site (InterPro:IPR017441),…	Protein kinase domain | Protein kinase, ATP binding site | Protein kinase-like domain | Serine/threonine-protein kinase, active site | Serine/threonine/dual specificity protein kinase, catalytic domain	NO
AT1G54540	2.18818	1.25132	1.21691e-07	7.86691e-06	UP	Late embryogenesis abundant (LEA) hydroxyproline-rich glycoprotein family	Late embryogenesis abundant (LEA) hydroxyproline-rich glycoprotein family; CONTAINS InterPro DOMAIN/s: Late embryogenesis abundant protein, group 2 (InterPro:IPR004864); BEST Arabidopsis thaliana protein match is: Late embryogenesis abundant (LEA) hydroxyproline-rich glycoprotein family (TAIR:AT1G65690.1)	Late embryogenesis abundant protein, LEA-14	NO
AT1G54560	2.33477	-1.52215	0.00111418	0.0179782	UP	Myosin family protein with Dil domain	XIE; CONTAINS InterPro DOMAIN/s: Dil domain (InterPro:IPR018444), Dilute (InterPro:IPR002710), Myosin, N-terminal, SH3-like (InterPro:IPR004009), Myosin head, motor domain (InterPro:IPR001609), IQ calmodulin-binding region (InterPro:IPR000048); BEST Arabidopsis thaliana protein match is: Myosin family protein with Dil domain (TAIR:AT1G08730.1)	Dil domain | Dilute | IQ motif, EF-hand binding site | Myosin head, motor domain | Myosin, N-terminal, SH3-like | P-loop containing nucleoside triphosphate hydrolase	NO
AT1G54730	-1.33344	5.24825	5.74415e-08	4.07386e-06	DOWN	Major facilitator superfamily protein	Major facilitator superfamily protein; FUNCTIONS IN: carbohydrate transmembrane transporter activity, sugar:hydrogen symporter activity; INVOLVED IN: transport, transmembrane transport; LOCATED IN: integral to membrane, membrane; EXPRESSED IN: 22 plant structures; EXPRESSED DURING: 13 growth stages; CONTAINS InterPro DOMAIN/s: Sugar transporter, conserved site (InterPro:IPR005829), Major facilita…	General substrate transporter | Major facilitator superfamily domain | Major facilitator superfamily domain, general substrate transporter | Sugar transporter, conserved site | Sugar/inositol transporter	NO
AT1G54820	-1.15215	4.46386	7.96486e-05	0.00206199	DOWN	Protein kinase superfamily protein	Protein kinase superfamily protein; FUNCTIONS IN: protein serine/threonine kinase activity, protein kinase activity, kinase activity, ATP binding; INVOLVED IN: protein amino acid phosphorylation; EXPRESSED IN: 18 plant structures; EXPRESSED DURING: 13 growth stages; CONTAINS InterPro DOMAIN/s: Protein kinase, catalytic domain (InterPro:IPR000719), Serine/threonine-protein kinase domain (InterPro:…	Concanavalin A-like lectin/glucanase, subgroup | Protein kinase domain | Protein kinase-like domain	NO
AT1G54890	2.10581	1.91107	7.0649e-05	0.0018663	UP	Late embryogenesis abundant (LEA) protein-related	Late embryogenesis abundant (LEA) protein-related; FUNCTIONS IN: molecular_function unknown; INVOLVED IN: biological_process unknown; LOCATED IN: endomembrane system; EXPRESSED IN: 7 plant structures; EXPRESSED DURING: 4 anthesis, petal differentiation and expansion stage; CONTAINS InterPro DOMAIN/s: Root cap (InterPro:IPR009646); BEST Arabidopsis thaliana protein match is: Late embryogenesis abu…	Root cap	NO
AT1G55120	-1.87002	1.76944	8.97206e-06	0.00033567	DOWN	beta-fructofuranosidase 5	beta-fructofuranosidase 5 (FRUCT5); FUNCTIONS IN: hydrolase activity, hydrolyzing O-glycosyl compounds, levanase activity; INVOLVED IN: carbohydrate metabolic process; INVOLVED IN: sucrose catabolic process, using beta-fructofuranosidase, carbohydrate metabolic process; EXPRESSED IN: 23 plant structures; LOCATED IN: vacuole; EXPRESSED DURING: 13 growth stages; CONTAINS InterPro DOMAIN/s: Glycosid…	Concanavalin A-like lectin/glucanases superfamily | Glycoside hydrolase, family 32 | Glycoside hydrolase, family 32, active site | Glycosyl hydrolase family 32, C-terminal | Glycosyl hydrolase family 32, N-terminal | Glycosyl hydrolase, five-bladed beta-propellor domain	NO
AT1G55170	0.91039	3.81916	0.00107743	0.0175563	UP		unknown protein; BEST Arabidopsis thaliana protein match is: unknown protein (TAIR:AT3G14750.1)		NO
AT1G55210	1.07288	5.05509	0.00113563	0.0182573	UP	Disease resistance-responsive (dirigent-like protein) family protein	Disease resistance-responsive (dirigent-like protein) family protein; FUNCTIONS IN: molecular_function unknown; INVOLVED IN: lignan biosynthetic process, defense response; LOCATED IN: endomembrane system; EXPRESSED IN: 22 plant structures; EXPRESSED DURING: 13 growth stages; CONTAINS InterPro DOMAIN/s: Plant disease resistance response protein (InterPro:IPR004265); BEST Arabidopsis thaliana prote…	Plant disease resistance response protein	NO
AT1G55450	-2.37387	5.08391	2.06778e-10	2.6481e-08	DOWN	S-adenosyl-L-methionine-dependent methyltransferases superfamily protein	S-adenosyl-L-methionine-dependent methyltransferases superfamily protein; FUNCTIONS IN: methyltransferase activity; EXPRESSED IN: 20 plant structures; INVOLVED IN: response to salt stress; EXPRESSED DURING: 13 growth stages; CONTAINS InterPro DOMAIN/s: Methyltransferase type 11 (InterPro:IPR013216); BEST Arabidopsis thaliana protein match is: S-adenosyl-L-methionine-dependent methyltransferases s…	Methyltransferase type 11 | S-adenosyl-L-methionine-dependent methyltransferase-like	NO
AT1G55545	-5.66277	-2.33682	0.000108921	0.00268445	DOWN				NO
AT1G55591	5.20716	-2.64112	0.000990295	0.0163501	UP	MIR158b; miRNA			NO
AT1G55740	1.042	4.54732	1.83451e-05	0.000616033	UP	seed imbibition 1	seed imbibition 1 (SIP1); CONTAINS InterPro DOMAIN/s: Glycoside hydrolase, catalytic core (InterPro:IPR017853), Raffinose synthase (InterPro:IPR008811); BEST Arabidopsis thaliana protein match is: seed imbibition 2 (TAIR:AT3G57520.1)	Aldolase-type TIM barrel | Glycoside hydrolase, superfamily | Glycosyl hydrolases 36	NO
AT1G55800	-3.80219	-2.27755	0.000804475	0.0137891	DOWN	Domain of unknown function (DUF2431)	CONTAINS InterPro DOMAIN/s: Domain of unknown function DUF2431 (InterPro:IPR019446); BEST Arabidopsis thaliana protein match is: Domain of unknown function (DUF2431) (TAIR:AT1G55790.1)	Domain of unknown function DUF2431	NO
AT1G55810	2.12087	6.52091	6.62641e-17	3.31775e-14	UP	uridine kinase-like 3	uridine kinase-like 3 (UKL3); FUNCTIONS IN: uracil phosphoribosyltransferase activity, phosphotransferase activity, alcohol group as acceptor, kinase activity, ATP binding; INVOLVED IN: biosynthetic process, metabolic process; LOCATED IN: cellular_component unknown; EXPRESSED IN: 22 plant structures; EXPRESSED DURING: 13 growth stages; CONTAINS InterPro DOMAIN/s: Phosphoribulokinase/uridine kinas…	P-loop containing nucleoside triphosphate hydrolase | Phosphoribosyltransferase-like | Phosphoribulokinase/uridine kinase | Uridine kinase like	NO
AT1G55940	2.19086	1.93513	1.15583e-08	9.68396e-07	UP	cytochrome P450, family 708, subfamily A, polypeptide 1	cytochrome P450, family 708, subfamily A, polypeptide 1 (CYP708A1); FUNCTIONS IN: electron carrier activity, monooxygenase activity, iron ion binding, oxygen binding, heme binding; INVOLVED IN: biological_process unknown; LOCATED IN: cellular_component unknown; EXPRESSED IN: shoot apex, shoot, hypocotyl, root, leaf; EXPRESSED DURING: LP.12 twelve leaves visible; CONTAINS InterPro DOMAIN/s: F-box …	Cytochrome P450 | Cytochrome P450, E-class, group IV | Cytochrome P450, conserved site | F-box associated domain, type 3 | F-box associated interaction domain	NO
AT1G56145	0.972503	4.96902	1.50687e-05	0.000520542	UP	Leucine-rich repeat transmembrane protein kinase	Leucine-rich repeat transmembrane protein kinase; FUNCTIONS IN: protein serine/threonine kinase activity, protein kinase activity, ATP binding; INVOLVED IN: protein amino acid phosphorylation; EXPRESSED IN: 18 plant structures; LOCATED IN: plasma membrane; EXPRESSED DURING: 7 growth stages; CONTAINS InterPro DOMAIN/s: Serine/threonine-protein kinase domain (InterPro:IPR002290), Leucine-rich repea…	Concanavalin A-like lectin/glucanase, subgroup | Leucine-rich repeat | Malectin | Protein kinase domain | Protein kinase-like domain | Serine-threonine/tyrosine-protein kinase catalytic domain | Serine/threonine-protein kinase, active site	NO
AT1G56320	1.98882	1.54461	6.51511e-07	3.52224e-05	UP		BEST Arabidopsis thaliana protein match is: Glycine-rich protein family (TAIR:AT5G49350.2)		NO
AT1G56520	-1.03971	3.61198	0.000322114	0.0065832	DOWN	Disease resistance protein (TIR-NBS-LRR class) family	Disease resistance protein (TIR-NBS-LRR class) family; FUNCTIONS IN: transmembrane receptor activity, nucleoside-triphosphatase activity, nucleotide binding, ATP binding; INVOLVED IN: signal transduction, apoptosis, defense response, innate immune response; INVOLVED IN: signal transduction, defense response, apoptosis, innate immune response; LOCATED IN: intrinsic to membrane; CONTAINS InterPro D…	AAA+ ATPase domain | Leucine-rich repeat | Leucine-rich repeat 3 | NB-ARC | P-loop containing nucleoside triphosphate hydrolase | Toll/interleukin-1 receptor homology (TIR) domain	NO
AT1G56580	0.905163	6.47951	0.000299855	0.00619217	UP	Protein of unknown function, DUF538	SMALLER WITH VARIABLE BRANCHES (SVB); CONTAINS InterPro DOMAIN/s: Protein of unknown function DUF538 (InterPro:IPR007493); BEST Arabidopsis thaliana protein match is: Protein of unknown function, DUF538 (TAIR:AT1G09310.1)	Protein of unknown function DUF538	NO
AT1G56650	2.83529	1.45675	1.5208e-05	0.000524278	UP	production of anthocyanin pigment 1	production of anthocyanin pigment 1 (PAP1); CONTAINS InterPro DOMAIN/s: SANT, DNA-binding (InterPro:IPR001005), Homeodomain-like (InterPro:IPR009057), Myb, DNA-binding (InterPro:IPR014778), HTH transcriptional regulator, Myb-type, DNA-binding (InterPro:IPR017930), Homeodomain-related (InterPro:IPR012287), Myb transcription factor (InterPro:IPR015495); BEST Arabidopsis thaliana protein match is: m…	Homeodomain-like | Myb domain | SANT/Myb domain	NO
AT1G56660	1.32017	3.60452	1.58057e-06	7.56182e-05	UP		unknown protein		NO
AT1G56670	1.52791	2.40042	1.57201e-05	0.000540826	UP	GDSL-like Lipase/Acylhydrolase superfamily protein	GDSL-like Lipase/Acylhydrolase superfamily protein; FUNCTIONS IN: hydrolase activity, acting on ester bonds, carboxylesterase activity; INVOLVED IN: lipid metabolic process; LOCATED IN: endomembrane system; EXPRESSED IN: 10 plant structures; EXPRESSED DURING: 6 growth stages; CONTAINS InterPro DOMAIN/s: Lipase, GDSL (InterPro:IPR001087); BEST Arabidopsis thaliana protein match is: GDSL-like Lipas…	Lipase, GDSL | SGNH hydrolase-type esterase domain	NO
AT1G56680	2.11607	1.48522	9.85823e-06	0.000362865	UP	Chitinase family protein	Chitinase family protein; FUNCTIONS IN: chitin binding, chitinase activity; INVOLVED IN: carbohydrate metabolic process, cell wall macromolecule catabolic process; LOCATED IN: endomembrane system; EXPRESSED IN: shoot apex, sepal, root, flower; EXPRESSED DURING: petal differentiation and expansion stage; CONTAINS InterPro DOMAIN/s: Glycoside hydrolase, family 19 (InterPro:IPR016283), Chitin-bindin…	Chitin-binding, type 1 | Glycoside hydrolase, family 19 | Glycoside hydrolase, family 19, catalytic | Lysozyme-like domain	NO
AT1G57560	2.3146	2.196	7.27146e-06	0.000280538	UP	myb domain protein 50	myb domain protein 50 (MYB50); CONTAINS InterPro DOMAIN/s: SANT, DNA-binding (InterPro:IPR001005), Homeodomain-like (InterPro:IPR009057), Myb, DNA-binding (InterPro:IPR014778), HTH transcriptional regulator, Myb-type, DNA-binding (InterPro:IPR017930), Homeodomain-related (InterPro:IPR012287), Myb transcription factor (InterPro:IPR015495); BEST Arabidopsis thaliana protein match is: myb domain pro…	Homeodomain-like | Myb domain | SANT/Myb domain	NO
AT1G57980	-1.23139	2.17627	0.000964044	0.0160029	DOWN	Nucleotide-sugar transporter family protein	Nucleotide-sugar transporter family protein; CONTAINS InterPro DOMAIN/s: Protein of unknown function DUF250 (InterPro:IPR004853); BEST Arabidopsis thaliana protein match is: purine permease 17 (TAIR:AT1G57943.1)	Triose-phosphate transporter domain	NO
AT1G57990	-1.57671	4.87259	0.000136038	0.00321988	DOWN	purine permease 18	purine permease 18 (PUP18); FUNCTIONS IN: purine transmembrane transporter activity; INVOLVED IN: purine transport; LOCATED IN: plasma membrane, membrane; EXPRESSED IN: cultured cell; CONTAINS InterPro DOMAIN/s: Protein of unknown function DUF250 (InterPro:IPR004853); BEST Arabidopsis thaliana protein match is: purine permease 17 (TAIR:AT1G57943.2)	Triose-phosphate transporter domain	NO
AT1G58007	2.30861	-0.966395	9.6255e-05	0.00241757	UP		unknown protein; BEST Arabidopsis thaliana protein match is: unknown protein (TAIR:AT1G09812.1)		NO
AT1G58190	1.62274	2.95889	1.93982e-07	1.19225e-05	UP	receptor like protein 9	receptor like protein 9 (RLP9); INVOLVED IN: signal transduction; LOCATED IN: endomembrane system; CONTAINS InterPro DOMAIN/s: Leucine-rich repeat, typical subtype (InterPro:IPR003591), Leucine-rich repeat-containing N-terminal domain, type 2 (InterPro:IPR013210), Leucine-rich repeat (InterPro:IPR001611); BEST Arabidopsis thaliana protein match is: receptor like protein 13 (TAIR:AT1G74170.1); BES…	Leucine-rich repeat | Leucine-rich repeat-containing N-terminal, type 2	NO
AT1G58330	2.75949	-0.888644	0.000256214	0.00545811	UP	transcription factor-related	ZW2; BEST Arabidopsis thaliana protein match is: RESPONSE TO ABA AND SALT 1 (TAIR:AT1G09950.1)	Transcription factor TGA like domain	NO
AT1G58350	0.708444	6.02643	0.00192734	0.0279641	UP	Putative serine esterase family protein	ZW18; INVOLVED IN: biological_process unknown; LOCATED IN: mitochondrion; CONTAINS InterPro DOMAIN/s: Protein of unknown function DUF3657 (InterPro:IPR022122), Protein of unknown function DUF676, hydrolase-like (InterPro:IPR007751); BEST Arabidopsis thaliana protein match is: Putative serine esterase family protein (TAIR:AT1G09980.1)	Alpha/Beta hydrolase fold | Domain of unknown function DUF676, lipase-like | Protein of unknown function DUF3657	YES	1:21662955:G-GA;exonic_variant
AT1G58400	1.12062	3.57567	0.0004628	0.00880654	UP	Disease resistance protein (CC-NBS-LRR class) family	Disease resistance protein (CC-NBS-LRR class) family; FUNCTIONS IN: ATP binding; INVOLVED IN: defense response, apoptosis; LOCATED IN: cellular_component unknown; CONTAINS InterPro DOMAIN/s: NB-ARC (InterPro:IPR002182), Disease resistance protein (InterPro:IPR000767); BEST Arabidopsis thaliana protein match is: Disease resistance protein (CC-NBS-LRR class) family (TAIR:AT1G58390.1)		NO
AT1G58520	2.28555	5.50624	3.65018e-13	8.59732e-11	UP	lipases;hydrolases, acting on ester bonds	RXW8; FUNCTIONS IN: hydrolase activity, acting on ester bonds, lipase activity; CONTAINS InterPro DOMAIN/s: Protein of unknown function DUF221 (InterPro:IPR003864); INVOLVED IN: lipid metabolic process; LOCATED IN: endomembrane system; LOCATED IN: endomembrane system, membrane; CONTAINS InterPro DOMAIN/s: Lipase, GDSL, active site (InterPro:IPR008265), Lipase, GDSL (InterPro:IPR001087); CONTAINS …	Domain of unknown function DUF221 | Lipase, GDSL | Lipase, GDSL, active site | SGNH hydrolase-type esterase domain	YES	1:21737291:C-T;intronic_variant
AT1G58643	3.73604	-1.11008	8.25633e-07	4.29802e-05	UP	Inositol-pentakisphosphate 2-kinase family protein	Inositol-pentakisphosphate 2-kinase family protein; FUNCTIONS IN: inositol pentakisphosphate 2-kinase activity, ATP binding; INVOLVED IN: biological_process unknown; LOCATED IN: endomembrane system; CONTAINS InterPro DOMAIN/s: Inositol-pentakisphosphate 2-kinase, metazoa (InterPro:IPR018009), Inositol-pentakisphosphate 2-kinase (InterPro:IPR009286); BEST Arabidopsis thaliana protein match is: Ino…	Inositol-pentakisphosphate 2-kinase	NO
AT1G59030	-3.43377	-2.48786	0.0030937	0.041316	DOWN	GDSL-like Lipase/Acylhydrolase superfamily protein	GDSL-like Lipase/Acylhydrolase superfamily protein; FUNCTIONS IN: lipase activity, hydrolase activity, acting on ester bonds, carboxylesterase activity; INVOLVED IN: lipid metabolic process; LOCATED IN: cellular_component unknown; CONTAINS InterPro DOMAIN/s: Lipase, GDSL (InterPro:IPR001087); BEST Arabidopsis thaliana protein match is: GDSL-like Lipase/Acylhydrolase superfamily protein (TAIR:AT1G…	Lipase, GDSL | Lipase, GDSL, active site | SGNH hydrolase-type esterase domain	NO
AT1G59590	-1.56199	2.14129	0.000543553	0.010048	DOWN	ZCF37	ZCF37; BEST Arabidopsis thaliana protein match is: unknown protein (TAIR:AT1G10220.1)		YES	1:21888003:G-A;protein_coding;sense;AAG>AAA;K>K
AT1G59620	-0.912625	4.31462	0.000337138	0.00684871	DOWN	Disease resistance protein (CC-NBS-LRR class) family	CW9; FUNCTIONS IN: ATP binding; INVOLVED IN: defense response, apoptosis; LOCATED IN: cellular_component unknown; EXPRESSED IN: 21 plant structures; EXPRESSED DURING: 12 growth stages; CONTAINS InterPro DOMAIN/s: NB-ARC (InterPro:IPR002182), Disease resistance protein (InterPro:IPR000767); BEST Arabidopsis thaliana protein match is: Disease resistance protein (CC-NBS-LRR class) family (TAIR:AT1G5…		NO
AT1G59725	2.44987	0.0995206	2.00533e-05	0.000663474	UP	DNAJ heat shock family protein	DNAJ heat shock family protein; FUNCTIONS IN: unfolded protein binding, heat shock protein binding; INVOLVED IN: protein folding; LOCATED IN: cellular_component unknown; EXPRESSED IN: root; CONTAINS InterPro DOMAIN/s: Molecular chaperone, heat shock protein, Hsp40, DnaJ (InterPro:IPR015609), HSP40/DnaJ peptide-binding (InterPro:IPR008971), Chaperone DnaJ, C-terminal (InterPro:IPR002939), Heat sho…	Chaperone DnaJ, C-terminal | DnaJ domain | DnaJ domain, conserved site | HSP40/DnaJ peptide-binding	NO
AT1G59750	0.891405	7.37734	0.000114505	0.00278659	UP	auxin response factor 1	auxin response factor 1 (ARF1); CONTAINS InterPro DOMAIN/s: Aux/IAA-ARF-dimerisation (InterPro:IPR011525), Transcriptional factor B3 (InterPro:IPR003340), AUX/IAA protein (InterPro:IPR003311), Auxin response factor (InterPro:IPR010525); BEST Arabidopsis thaliana protein match is: auxin response factor 11 (TAIR:AT2G46530.1); BEST Arabidopsis thaliana protein match is: auxin response factor 11 (TAI…	AUX/IAA protein | Aux/IAA-ARF-dimerisation | Auxin response factor | B3 DNA binding domain | DNA-binding pseudobarrel domain	NO
AT1G59840	-0.787163	5.10339	0.000658439	0.0117525	DOWN	cofactor assembly of complex C	cofactor assembly of complex C (CCB4); FUNCTIONS IN: molecular_function unknown; INVOLVED IN: cytochrome b6f complex assembly; LOCATED IN: chloroplast; EXPRESSED IN: 20 plant structures; EXPRESSED DURING: 13 growth stages; CONTAINS InterPro DOMAIN/s: Protein of unknown function DUF2930 (InterPro:IPR021325)	Protein of unknown function DUF2930	NO
AT1G59870	-1.08558	9.0708	0.00066233	0.0118031	DOWN	ABC-2 and Plant PDR ABC-type transporter family protein	PENETRATION 3 (PEN3); FUNCTIONS IN: ATPase activity, coupled to transmembrane movement of substances, cadmium ion transmembrane transporter activity; INVOLVED IN: in 9 processes; LOCATED IN: mitochondrion, plasma membrane, chloroplast, membrane, chloroplast envelope; EXPRESSED IN: 29 plant structures; EXPRESSED DURING: 13 growth stages; CONTAINS InterPro DOMAIN/s: ATPase, AAA+ type, core (InterPr…	AAA+ ATPase domain | ABC transporter-like | ABC-2 type transporter | ABC-transporter extracellular N-terminal domain | P-loop containing nucleoside triphosphate hydrolase | Plant PDR ABC transporter associated	NO
AT1G59940	2.00053	1.68482	3.01184e-05	0.000923877	UP	response regulator 3	response regulator 3 (ARR3); CONTAINS InterPro DOMAIN/s: CheY-like (InterPro:IPR011006), Signal transduction response regulator, receiver domain (InterPro:IPR001789); BEST Arabidopsis thaliana protein match is: response regulator 4 (TAIR:AT1G10470.1)		NO
AT1G59970	2.15743	3.55691	2.31784e-12	4.56534e-10	UP	Matrixin family protein	Matrixin family protein; FUNCTIONS IN: metallopeptidase activity, metalloendopeptidase activity, zinc ion binding; INVOLVED IN: proteolysis, metabolic process; LOCATED IN: plasma membrane, anchored to membrane; EXPRESSED IN: 22 plant structures; EXPRESSED DURING: 13 growth stages; CONTAINS InterPro DOMAIN/s: Peptidase M10, metallopeptidase (InterPro:IPR001818), Peptidoglycan binding-like (InterPr…	Metallopeptidase, catalytic domain | Peptidase M10, metallopeptidase | Peptidase M10A | Peptidase M10A, cysteine switch, zinc binding site | Peptidase, metallopeptidase | Peptidoglycan binding-like	NO
AT1G60090	-3.02969	-1.48017	0.00182225	0.0266166	DOWN	beta glucosidase 4	beta glucosidase 4 (BGLU4); FUNCTIONS IN: cation binding, hydrolase activity, hydrolyzing O-glycosyl compounds, catalytic activity; INVOLVED IN: response to karrikin; LOCATED IN: endomembrane system; EXPRESSED IN: root; CONTAINS InterPro DOMAIN/s: Glycoside hydrolase, family 1 (InterPro:IPR001360), Glycoside hydrolase, family 1, active site (InterPro:IPR018120), Glycoside hydrolase, catalytic cor…	Glycoside hydrolase, catalytic domain | Glycoside hydrolase, family 1 | Glycoside hydrolase, family 1, active site | Glycoside hydrolase, superfamily	NO
AT1G60095	1.9349	1.41151	1.76754e-06	8.31458e-05	UP	Mannose-binding lectin superfamily protein	Mannose-binding lectin superfamily protein; CONTAINS InterPro DOMAIN/s: Mannose-binding lectin (InterPro:IPR001229); BEST Arabidopsis thaliana protein match is: Mannose-binding lectin superfamily protein (TAIR:AT1G60110.1)	Mannose-binding lectin	NO
AT1G60190	-2.66053	3.87346	0.00142996	0.0219114	DOWN	ARM repeat superfamily protein	ARM repeat superfamily protein; FUNCTIONS IN: ubiquitin-protein ligase activity, binding, zinc ion binding; INVOLVED IN: protein ubiquitination; LOCATED IN: ubiquitin ligase complex; EXPRESSED IN: 6 plant structures; EXPRESSED DURING: 4 anthesis, petal differentiation and expansion stage; CONTAINS InterPro DOMAIN/s: Zinc finger, RING-type (InterPro:IPR001841), U box domain (InterPro:IPR003613), A…	Armadillo | Armadillo-like helical | Armadillo-type fold | U box domain | Zinc finger, RING-type | Zinc finger, RING/FYVE/PHD-type	NO
AT1G60390	1.17509	3.124	0.00105997	0.017322	UP	polygalacturonase 1	polygalacturonase 1 (PG1); FUNCTIONS IN: polygalacturonase activity; INVOLVED IN: biological_process unknown; LOCATED IN: endomembrane system; EXPRESSED IN: 23 plant structures; EXPRESSED DURING: 14 growth stages; CONTAINS InterPro DOMAIN/s: BURP (InterPro:IPR004873); BEST Arabidopsis thaliana protein match is: polygalacturonase 2 (TAIR:AT1G70370.2)	BURP domain	NO
AT1G60620	1.71487	4.79577	6.11133e-14	1.77445e-11	UP	RNA polymerase I subunit 43	RNA polymerase I subunit 43 (RPAC43); FUNCTIONS IN: DNA-directed RNA polymerase activity, protein dimerization activity, DNA binding; INVOLVED IN: transcription; EXPRESSED IN: 11 plant structures; EXPRESSED DURING: 4 anthesis, C globular stage, petal differentiation and expansion stage, E expanded cotyledon stage, D bilateral stage; CONTAINS InterPro DOMAIN/s: DNA-directed RNA polymerase, insert …	DNA-directed RNA polymerase, 30-40kDa subunit, conserved site | DNA-directed RNA polymerase, RBP11-like dimerisation domain | DNA-directed RNA polymerase, RpoA/D/Rpb3-type | DNA-directed RNA polymerase, insert domain	NO
AT1G60787	2.39771	-0.682841	1.05466e-05	0.000384437	UP				NO
AT1G60900	-0.65111	6.73825	0.00391257	0.0495411	DOWN	U2 snRNP auxilliary factor, large subunit, splicing factor	U2 snRNP auxilliary factor, large subunit, splicing factor; FUNCTIONS IN: RNA binding, nucleotide binding, nucleic acid binding; INVOLVED IN: mRNA processing; LOCATED IN: nucleus; CONTAINS InterPro DOMAIN/s: RNA recognition motif, RNP-1 (InterPro:IPR000504), Nucleotide-binding, alpha-beta plait (InterPro:IPR012677), U2 snRNP auxilliary factor, large subunit, splicing factor (InterPro:IPR006529); …	Nucleotide-binding, alpha-beta plait | RNA recognition motif domain | U2 snRNP auxilliary factor, large subunit, splicing factor	NO
AT1G61050	1.21019	1.71148	0.000625393	0.0112943	UP	alpha 1,4-glycosyltransferase family protein	alpha 1,4-glycosyltransferase family protein; FUNCTIONS IN: transferase activity, transferring glycosyl groups, transferase activity; INVOLVED IN: biological_process unknown; LOCATED IN: Golgi stack; CONTAINS InterPro DOMAIN/s: Alpha 1,4-glycosyltransferase conserved region (InterPro:IPR007652), Glycosyltransferase, DXD sugar-binding region (InterPro:IPR007577); BEST Arabidopsis thaliana protein …	Alpha 1,4-glycosyltransferase domain | Glycosyltransferase, DXD sugar-binding motif | Nucleotide-diphospho-sugar transferases	NO
AT1G61110	-6.17762	-1.8932	0.000363376	0.00725911	DOWN	NAC domain containing protein 25	NAC domain containing protein 25 (NAC025); FUNCTIONS IN: sequence-specific DNA binding transcription factor activity; INVOLVED IN: multicellular organismal development, regulation of transcription; LOCATED IN: cellular_component unknown; EXPRESSED IN: 6 plant structures; EXPRESSED DURING: 4 anthesis, petal differentiation and expansion stage; CONTAINS InterPro DOMAIN/s: No apical meristem (NAM) p…	NAC domain	NO
AT1G61240	0.66384	4.89711	0.0031351	0.0417229	UP	Protein of unknown function (DUF707)	Protein of unknown function (DUF707); FUNCTIONS IN: molecular_function unknown; INVOLVED IN: biological_process unknown; LOCATED IN: cellular_component unknown; EXPRESSED IN: 19 plant structures; EXPRESSED DURING: 11 growth stages; CONTAINS InterPro DOMAIN/s: Protein of unknown function DUF707 (InterPro:IPR007877); BEST Arabidopsis thaliana protein match is: Protein of unknown function (DUF707) (…	Protein of unknown function DUF707	NO
AT1G61275	3.08342	-0.689966	3.10188e-07	1.82967e-05	UP	U12; snRNA	gi|22293600|emb|AJ505704.1|ATH505704 Arabidopsis thaliana U12 snRNA, partial		NO
AT1G61280	2.05919	1.25599	1.88809e-07	1.1647e-05	UP	Phosphatidylinositol N-acetylglucosaminyltransferase, GPI19/PIG-P subunit	Phosphatidylinositol N-acetylglucosaminyltransferase, GPI19/PIG-P subunit; CONTAINS InterPro DOMAIN/s: PIG-P (InterPro:IPR013717), Phosphatidylinositol N-acetylglucosaminyltransferase, GPI19/PIG-P subunit (InterPro:IPR016542); BEST Arabidopsis thaliana protein match is: Phosphatidylinositol N-acetylglucosaminyltransferase, GPI19/PIG-P subunit (TAIR:AT2G39445.1)	PIG-P | Phosphatidylinositol N-acetylglucosaminyltransferase, GPI19/PIG-P subunit	NO
AT1G61290	3.10661	-1.34172	0.000546438	0.0100902	UP	syntaxin of plants 124	syntaxin of plants 124 (SYP124); CONTAINS InterPro DOMAIN/s: Target SNARE coiled-coil domain (InterPro:IPR000727), t-SNARE (InterPro:IPR010989), Syntaxin/epimorphin, conserved site (InterPro:IPR006012), Syntaxin, N-terminal (InterPro:IPR006011); BEST Arabidopsis thaliana protein match is: syntaxin of plants 125 (TAIR:AT1G11250.1)	Syntaxin, N-terminal domain | Syntaxin/epimorphin, conserved site | Target SNARE coiled-coil domain | t-SNARE	NO
AT1G61370	1.28999	3.36042	0.000138057	0.00326538	UP	S-locus lectin protein kinase family protein	S-locus lectin protein kinase family protein; FUNCTIONS IN: in 6 functions; INVOLVED IN: protein amino acid phosphorylation, recognition of pollen; LOCATED IN: endomembrane system; EXPRESSED IN: 13 plant structures; EXPRESSED DURING: 4 anthesis, F mature embryo stage, petal differentiation and expansion stage, E expanded cotyledon stage, D bilateral stage; CONTAINS InterPro DOMAIN/s: Curculin-lik…	Apple-like | Bulb-type lectin domain | Concanavalin A-like lectin/glucanase, subgroup | Epidermal growth factor-like domain | PAN-2 domain | Protein kinase domain | Protein kinase-like domain | S-locus glycoprotein | S-locus receptor kinase, C-terminal | S-receptor-like serine/threonine-protein kinase | Serine-threonine/tyrosine-protein kinase catalytic domain | Serine/threonine-protein kinase, a…	NO
AT1G61380	1.53217	5.53665	1.45827e-09	1.53009e-07	UP	S-domain-1 29	S-domain-1 29 (SD1-29); FUNCTIONS IN: carbohydrate binding, protein kinase activity, kinase activity; INVOLVED IN: protein amino acid autophosphorylation; LOCATED IN: endomembrane system; EXPRESSED IN: 23 plant structures; EXPRESSED DURING: 13 growth stages; CONTAINS InterPro DOMAIN/s: Curculin-like (mannose-binding) lectin (InterPro:IPR001480), PAN-2 domain (InterPro:IPR013227), Apple-like (Inte…	Apple-like | Bulb-type lectin domain | Concanavalin A-like lectin/glucanase, subgroup | Epidermal growth factor-like domain | PAN-2 domain | Protein kinase domain | Protein kinase-like domain | S-locus glycoprotein | S-locus receptor kinase, C-terminal | S-receptor-like serine/threonine-protein kinase | Serine-threonine/tyrosine-protein kinase catalytic domain | Serine/threonine-protein kinase, a…	NO
AT1G61400	1.76568	3.76513	4.89925e-07	2.72507e-05	UP	S-locus lectin protein kinase family protein	S-locus lectin protein kinase family protein; FUNCTIONS IN: in 6 functions; INVOLVED IN: protein amino acid phosphorylation, recognition of pollen; LOCATED IN: cellular_component unknown; EXPRESSED IN: 11 plant structures; EXPRESSED DURING: LP.10 ten leaves visible, F mature embryo stage, petal differentiation and expansion stage, E expanded cotyledon stage, D bilateral stage; CONTAINS InterPro D…		YES	1:22658172:CA-C;exonic_variant
AT1G61420	-1.91586	2.12668	1.09191e-05	0.000396726	DOWN	S-locus lectin protein kinase family protein	S-locus lectin protein kinase family protein; FUNCTIONS IN: in 6 functions; INVOLVED IN: protein amino acid phosphorylation, recognition of pollen; LOCATED IN: endomembrane system; EXPRESSED IN: 20 plant structures; EXPRESSED DURING: 11 growth stages; CONTAINS InterPro DOMAIN/s: Curculin-like (mannose-binding) lectin (InterPro:IPR001480), Apple-like (InterPro:IPR003609), PAN-2 domain (InterPro:IP…	Apple-like | Bulb-type lectin domain | Concanavalin A-like lectin/glucanase, subgroup | PAN-2 domain | Protein kinase domain | Protein kinase-like domain | S-locus glycoprotein | S-locus receptor kinase, C-terminal | S-receptor-like serine/threonine-protein kinase | Serine-threonine/tyrosine-protein kinase catalytic domain | Serine/threonine-protein kinase, active site	NO
AT1G61590	1.02479	3.85166	0.000254376	0.00542256	UP	Protein kinase superfamily protein	Protein kinase superfamily protein; FUNCTIONS IN: protein serine/threonine kinase activity, protein kinase activity, kinase activity, ATP binding; INVOLVED IN: protein amino acid phosphorylation; LOCATED IN: chloroplast; EXPRESSED IN: 6 plant structures; EXPRESSED DURING: 4 anthesis, petal differentiation and expansion stage; CONTAINS InterPro DOMAIN/s: Protein kinase, ATP binding site (InterPro:…	Protein kinase domain | Protein kinase, ATP binding site | Protein kinase-like domain | Serine-threonine/tyrosine-protein kinase catalytic domain | Serine/threonine-protein kinase, active site	YES	1:22724685:G-GA;intronic_variant
AT1G61610	2.00243	0.565403	3.41572e-05	0.00103087	UP	S-locus lectin protein kinase family protein	S-locus lectin protein kinase family protein; FUNCTIONS IN: in 6 functions; INVOLVED IN: protein amino acid phosphorylation, recognition of pollen; LOCATED IN: endomembrane system; EXPRESSED IN: 7 plant structures; EXPRESSED DURING: 6 growth stages; CONTAINS InterPro DOMAIN/s: Curculin-like (mannose-binding) lectin (InterPro:IPR001480), Protein kinase, ATP binding site (InterPro:IPR017441), PAN-2…	Apple-like | Bulb-type lectin domain | Concanavalin A-like lectin/glucanase, subgroup | Epidermal growth factor-like domain | PAN-2 domain | Protein kinase domain | Protein kinase, ATP binding site | Protein kinase-like domain | S-locus glycoprotein | S-receptor-like serine/threonine-protein kinase | Serine-threonine/tyrosine-protein kinase catalytic domain | Serine/threonine-protein kinase, acti…	NO
AT1G61630	5.0021	-2.75559	0.00367286	0.0471799	UP	equilibrative nucleoside transporter 7	equilibrative nucleoside transporter 7 (ENT7); FUNCTIONS IN: nucleoside transmembrane transporter activity; INVOLVED IN: transport; LOCATED IN: plasma membrane; EXPRESSED IN: petal, leaf whorl, sperm cell, sepal, flower; EXPRESSED DURING: 4 anthesis, petal differentiation and expansion stage; CONTAINS InterPro DOMAIN/s: Delayed-early response protein/equilibrative nucleoside transporter (InterPro…	Equilibrative nucleoside transporter | Major facilitator superfamily domain, general substrate transporter	NO
AT1G61810	-1.9906	1.81084	0.00019362	0.00431304	DOWN	beta-glucosidase 45	beta-glucosidase 45 (BGLU45); FUNCTIONS IN: cation binding, hydrolase activity, hydrolyzing O-glycosyl compounds, catalytic activity; INVOLVED IN: lignin biosynthetic process; LOCATED IN: endomembrane system; EXPRESSED IN: 18 plant structures; EXPRESSED DURING: 9 growth stages; CONTAINS InterPro DOMAIN/s: Glycoside hydrolase, family 1 (InterPro:IPR001360), Glycoside hydrolase, family 1, active si…	Glycoside hydrolase, catalytic domain | Glycoside hydrolase, family 1 | Glycoside hydrolase, family 1, active site | Glycoside hydrolase, superfamily	YES	1:22831253:C-CT;intronic_variant
AT1G61830	-2.16141	-1.55683	0.00162587	0.0243069	DOWN		pseudogene, CHP-rich zinc finger protein, putative, similar to putative CHP-rich zinc finger protein GI:9293934 from (Arabidopsis thaliana)		NO
AT1G61860	1.62578	0.554451	0.00085037	0.0144434	UP	Protein kinase superfamily protein	Protein kinase superfamily protein; FUNCTIONS IN: protein serine/threonine kinase activity, protein kinase activity, kinase activity, ATP binding; INVOLVED IN: protein amino acid phosphorylation; LOCATED IN: cellular_component unknown; EXPRESSED IN: 12 plant structures; EXPRESSED DURING: L mature pollen stage, M germinated pollen stage, 4 anthesis, C globular stage, petal differentiation and expa…	Concanavalin A-like lectin/glucanase, subgroup | Protein kinase domain | Protein kinase, ATP binding site | Protein kinase-like domain | Serine/threonine-protein kinase, active site	NO
AT1G61930	1.78213	0.919242	4.77861e-05	0.00135936	UP	Protein of unknown function, DUF584	Protein of unknown function, DUF584; CONTAINS InterPro DOMAIN/s: Protein of unknown function DUF584 (InterPro:IPR007608); BEST Arabidopsis thaliana protein match is: Protein of unknown function, DUF584 (TAIR:AT1G11700.1)	Senescence regulator S40	NO
AT1G62000	3.36342	-2.06891	0.000385688	0.00761451	UP		unknown protein; FUNCTIONS IN: molecular_function unknown; INVOLVED IN: biological_process unknown; LOCATED IN: endomembrane system; BEST Arabidopsis thaliana protein match is: unknown protein (TAIR:AT1G62080.1)		NO
AT1G62030	-1.46712	3.12066	3.62306e-06	0.000154076	DOWN	Cysteine/Histidine-rich C1 domain family protein	Cysteine/Histidine-rich C1 domain family protein; CONTAINS InterPro DOMAIN/s: DC1 (InterPro:IPR004146), C1-like (InterPro:IPR011424); BEST Arabidopsis thaliana protein match is: Cysteine/Histidine-rich C1 domain family protein (TAIR:AT4G02540.1)	C1-like | DC1	NO
AT1G62035	3.5559	2.74558	5.95605e-22	5.57238e-19	UP	MIR171C; miRNA			NO
AT1G62085	-1.29091	2.3453	0.000198265	0.00440485	DOWN	Mitochondrial transcription termination factor family protein	Mitochondrial transcription termination factor family protein; CONTAINS InterPro DOMAIN/s: Mitochodrial transcription termination factor-related (InterPro:IPR003690); BEST Arabidopsis thaliana protein match is: Mitochondrial transcription termination factor family protein (TAIR:AT1G62110.1)	Mitochodrial transcription termination factor-related	NO
AT1G62320	1.53681	1.12136	0.000140178	0.0033109	UP	ERD (early-responsive to dehydration stress) family protein	ERD (early-responsive to dehydration stress) family protein; FUNCTIONS IN: molecular_function unknown; INVOLVED IN: biological_process unknown; LOCATED IN: endomembrane system, membrane; EXPRESSED IN: pollen tube; CONTAINS InterPro DOMAIN/s: Protein of unknown function DUF221 (InterPro:IPR003864); BEST Arabidopsis thaliana protein match is: ERD (early-responsive to dehydration stress) family prot…	Domain of unknown function DUF221 | Domain of unknown function DUF4463	NO
AT1G62350	-2.95776	0.790647	7.97618e-10	8.83703e-08	DOWN	Pentatricopeptide repeat (PPR) superfamily protein	Pentatricopeptide repeat (PPR) superfamily protein; CONTAINS InterPro DOMAIN/s: Pentatricopeptide repeat (InterPro:IPR002885); BEST Arabidopsis thaliana protein match is: Pentatricopeptide repeat (PPR) superfamily protein (TAIR:AT3G46870.1)		NO
AT1G62370	1.37616	2.37885	0.000125679	0.00301925	UP	RING/U-box superfamily protein	RING/U-box superfamily protein; FUNCTIONS IN: zinc ion binding; CONTAINS InterPro DOMAIN/s: Zinc finger, RING-type (InterPro:IPR001841), Zinc finger, C3HC4 RING-type (InterPro:IPR018957); BEST Arabidopsis thaliana protein match is: RING/U-box superfamily protein (TAIR:AT4G03965.1)	Zinc finger, RING-type | Zinc finger, RING/FYVE/PHD-type	NO
AT1G62440	2.10516	2.65682	2.2176e-05	0.000723103	UP	leucine-rich repeat/extensin 2	leucine-rich repeat/extensin 2 (LRX2); CONTAINS InterPro DOMAIN/s: Leucine-rich repeat-containing N-terminal domain, type 2 (InterPro:IPR013210), Leucine-rich repeat (InterPro:IPR001611); BEST Arabidopsis thaliana protein match is: leucine-rich repeat/extensin 1 (TAIR:AT1G12040.1)		NO
AT1G62480	1.51201	7.37691	7.04518e-09	6.21175e-07	UP	Vacuolar calcium-binding protein-related	Vacuolar calcium-binding protein-related; INVOLVED IN: response to cadmium ion, response to salt stress; LOCATED IN: cellular_component unknown; EXPRESSED IN: 23 plant structures; EXPRESSED DURING: 13 growth stages		NO
AT1G62515	3.34819	-0.480715	0.000250646	0.0053566	UP				NO
AT1G62570	0.811381	5.04145	0.000591866	0.0108047	UP	flavin-monooxygenase glucosinolate S-oxygenase 4	flavin-monooxygenase glucosinolate S-oxygenase 4 (FMO GS-OX4); CONTAINS InterPro DOMAIN/s: Flavin-containing monooxygenase FMO (InterPro:IPR000960), Flavin-containing monooxygenase-like (InterPro:IPR020946); BEST Arabidopsis thaliana protein match is: flavin-monooxygenase glucosinolate S-oxygenase 2 (TAIR:AT1G62540.1)	Flavin monooxygenase FMO | Flavin monooxygenase-like	NO
AT1G62580	-1.90154	-0.768887	0.00138001	0.0213017	DOWN	Flavin-binding monooxygenase family protein	Flavin-binding monooxygenase family protein; FUNCTIONS IN: NADP or NADPH binding, monooxygenase activity, FAD binding, flavin-containing monooxygenase activity; INVOLVED IN: oxidation reduction; LOCATED IN: intrinsic to endoplasmic reticulum membrane; CONTAINS InterPro DOMAIN/s: FAD-dependent pyridine nucleotide-disulphide oxidoreductase (InterPro:IPR013027), Dimethylaniline monooxygenase, N-oxid…		NO
AT1G62660	0.923019	6.13688	0.000373563	0.00740171	UP	Glycosyl hydrolases family 32 protein	Glycosyl hydrolases family 32 protein; FUNCTIONS IN: hydrolase activity, hydrolyzing O-glycosyl compounds; INVOLVED IN: sucrose catabolic process, using beta-fructofuranosidase, carbohydrate metabolic process; LOCATED IN: vacuole; EXPRESSED IN: 23 plant structures; EXPRESSED DURING: 12 growth stages; CONTAINS InterPro DOMAIN/s: Protein of unknown function DUF3357 (InterPro:IPR021792), Glycoside h…	Beta-fructofuranosidase | Concanavalin A-like lectin/glucanases superfamily | Glycoside hydrolase, family 32 | Glycoside hydrolase, family 32, active site | Glycosyl hydrolase family 32, C-terminal | Glycosyl hydrolase family 32, N-terminal | Glycosyl hydrolase, five-bladed beta-propellor domain	NO
AT1G62790	0.813899	4.40782	0.00269665	0.0370567	UP	Bifunctional inhibitor/lipid-transfer protein/seed storage 2S albumin superfamily protein	Bifunctional inhibitor/lipid-transfer protein/seed storage 2S albumin superfamily protein; CONTAINS InterPro DOMAIN/s: Bifunctional inhibitor/plant lipid transfer protein/seed storage (InterPro:IPR016140), Plant lipid transfer protein/seed storage/trypsin-alpha amylase inhibitor (InterPro:IPR003612); BEST Arabidopsis thaliana protein match is: receptor serine/threonine kinase, putative (TAIR:AT1G…	Bifunctional inhibitor/plant lipid transfer protein/seed storage helical domain	NO
AT1G62800	1.15483	4.09154	1.46681e-05	0.000508791	UP	aspartate aminotransferase 4	aspartate aminotransferase 4 (ASP4); FUNCTIONS IN: pyridoxal phosphate binding, transferase activity, transferring nitrogenous groups, transaminase activity, catalytic activity; FUNCTIONS IN: transferase activity, transferring nitrogenous groups, pyridoxal phosphate binding, transaminase activity, catalytic activity; INVOLVED IN: asparagine catabolic process, biosynthetic process, glutamate catab…	Aminotransferase, class I/classII | Aminotransferases, class-I, pyridoxal-phosphate-binding site | Aspartate/other aminotransferase | Pyridoxal phosphate-dependent transferase | Pyridoxal phosphate-dependent transferase, major region, subdomain 1	NO
AT1G62886	2.17576	-1.49469	0.00249279	0.034594	UP	Nucleotide excision repair, TFIIH, subunit TTDA	Nucleotide excision repair, TFIIH, subunit TTDA; FUNCTIONS IN: DNA binding; INVOLVED IN: nucleotide-excision repair; LOCATED IN: endomembrane system; CONTAINS InterPro DOMAIN/s: Nucleotide excision repair, TFIIH, subunit TTDA (InterPro:IPR009400); BEST Arabidopsis thaliana protein match is: Nucleotide excision repair, TFIIH, subunit TTDA (TAIR:AT1G12400.1)	TFIIH subunit TTDA/Tfb5	NO
AT1G62930	1.22707	2.83421	0.000129655	0.00309709	UP	Tetratricopeptide repeat (TPR)-like superfamily protein	Tetratricopeptide repeat (TPR)-like superfamily protein; CONTAINS InterPro DOMAIN/s: Pentatricopeptide repeat (InterPro:IPR002885); BEST Arabidopsis thaliana protein match is: Tetratricopeptide repeat (TPR)-like superfamily protein (TAIR:AT1G63130.1)	Pentatricopeptide repeat | Tetratricopeptide-like helical domain	NO
AT1G62980	1.72877	2.90397	0.000931627	0.0155491	UP	expansin A18	expansin A18 (EXPA18); INVOLVED IN: plant-type cell wall modification involved in multidimensional cell growth, unidimensional cell growth, plant-type cell wall loosening; LOCATED IN: endomembrane system, extracellular region; EXPRESSED IN: root hair, root; CONTAINS InterPro DOMAIN/s: Pollen allergen, N-terminal (InterPro:IPR014734), Rare lipoprotein A (InterPro:IPR005132), Pollen allergen/expans…	Barwin-like endoglucanase | Expansin | Expansin, cellulose-binding-like domain | Expansin/Lol pI | Expansin/pollen allergen, DPBB domain | RlpA-like double-psi beta-barrel domain	NO
AT1G62990	1.08269	2.56418	0.000899858	0.0151465	UP	KNOTTED-like homeobox of Arabidopsis thaliana 7	KNOTTED-like homeobox of Arabidopsis thaliana 7 (KNAT7); CONTAINS InterPro DOMAIN/s: ELK (InterPro:IPR005539), KNOX1 (InterPro:IPR005540), Homeobox (InterPro:IPR001356), Homeodomain-like (InterPro:IPR009057), KNOX2 (InterPro:IPR005541), Homeodomain-related (InterPro:IPR012287); BEST Arabidopsis thaliana protein match is: KNOTTED1-like homeobox gene 3 (TAIR:AT5G25220.1)	ELK | Homeobox KN domain | Homeobox domain | Homeodomain-like | KNOX1 | KNOX2	NO
AT1G63010	1.09212	6.62987	3.27572e-06	0.000141994	UP	Major Facilitator Superfamily with SPX (SYG1/Pho81/XPR1) domain-containing protein	Major Facilitator Superfamily with SPX (SYG1/Pho81/XPR1) domain-containing protein; INVOLVED IN: transmembrane transport; LOCATED IN: vacuolar membrane; LOCATED IN: vacuolar membrane, plant-type vacuole; EXPRESSED IN: 24 plant structures; EXPRESSED IN: 25 plant structures; EXPRESSED DURING: 13 growth stages; CONTAINS InterPro DOMAIN/s: SPX, N-terminal (InterPro:IPR004331), Major facilitator super…	Major facilitator superfamily | Major facilitator superfamily domain, general substrate transporter | SPX, N-terminal	NO
AT1G63055	-2.19907	0.512276	0.000169334	0.00385361	DOWN		unknown protein; BEST Arabidopsis thaliana protein match is: unknown protein (TAIR:AT1G63057.2)		NO
AT1G63057	-3.02407	-0.644626	4.04549e-05	0.00118073	DOWN		unknown protein; FUNCTIONS IN: molecular_function unknown; INVOLVED IN: biological_process unknown; LOCATED IN: endomembrane system; BEST Arabidopsis thaliana protein match is: unknown protein (TAIR:AT1G63055.1)		YES	1:23381140:G-A;intronic_variant
AT1G63350	-2.1708	1.64142	3.2331e-08	2.41987e-06	DOWN	Disease resistance protein (CC-NBS-LRR class) family	Disease resistance protein (CC-NBS-LRR class) family; FUNCTIONS IN: ATP binding; INVOLVED IN: N-terminal protein myristoylation, defense response; LOCATED IN: cellular_component unknown; EXPRESSED IN: 6 plant structures; EXPRESSED DURING: LP.06 six leaves visible, LP.04 four leaves visible, 4 anthesis, LP.08 eight leaves visible; CONTAINS InterPro DOMAIN/s: Leucine-rich repeat-containing protein …	Leucine-rich repeat | NB-ARC | P-loop containing nucleoside triphosphate hydrolase	NO
AT1G63410	1.74699	0.215532	0.000214293	0.0046959	UP	Protein of unknown function (DUF567)	Protein of unknown function (DUF567); CONTAINS InterPro DOMAIN/s: Protein of unknown function DUF567 (InterPro:IPR007612); BEST Arabidopsis thaliana protein match is: Protein of unknown function (DUF567) (TAIR:AT3G14260.1)		NO
AT1G63450	2.0315	0.911815	3.37188e-06	0.000145414	UP	root hair specific 8	root hair specific 8 (RHS8); FUNCTIONS IN: catalytic activity; LOCATED IN: membrane; EXPRESSED IN: root hair, root; CONTAINS InterPro DOMAIN/s: Exostosin-like (InterPro:IPR004263); BEST Arabidopsis thaliana protein match is: Exostosin family protein (TAIR:AT5G41250.1)	Exostosin-like	NO
AT1G63650	2.40033	4.14102	5.23924e-17	2.67368e-14	UP	basic helix-loop-helix (bHLH) DNA-binding superfamily protein	ENHANCER OF GLABRA 3 (EGL3); FUNCTIONS IN: DNA binding, sequence-specific DNA binding transcription factor activity; INVOLVED IN: epidermal cell fate specification, regulation of transcription; LOCATED IN: nucleus; EXPRESSED IN: 14 plant structures; EXPRESSED DURING: 7 growth stages; CONTAINS InterPro DOMAIN/s: Helix-loop-helix DNA-binding domain (InterPro:IPR001092), Helix-loop-helix DNA-binding…	Myc-type, basic helix-loop-helix (bHLH) domain | Transcription factor MYC/MYB N-terminal	NO
AT1G63670	0.870444	5.08194	0.000960995	0.0159602	UP	Protein of unknown function (DUF3741)	FUNCTIONS IN: molecular_function unknown; INVOLVED IN: biological_process unknown; LOCATED IN: cellular_component unknown; EXPRESSED IN: 22 plant structures; EXPRESSED DURING: 13 growth stages; CONTAINS InterPro DOMAIN/s: Protein of unknown function DUF3741 (InterPro:IPR022212); BEST Arabidopsis thaliana protein match is: Phosphatidylinositol N-acetyglucosaminlytransferase subunit P-related (TAIR…	Domain of unknown function DUF4378 | Protein of unknown function DUF3741	NO
AT1G63750	-2.47399	2.79053	1.46202e-10	1.94633e-08	DOWN	Disease resistance protein (TIR-NBS-LRR class) family	Disease resistance protein (TIR-NBS-LRR class) family; FUNCTIONS IN: nucleoside-triphosphatase activity, nucleotide binding, ATP binding; FUNCTIONS IN: transmembrane receptor activity, nucleoside-triphosphatase activity, nucleotide binding, ATP binding; INVOLVED IN: defense response, apoptosis; INVOLVED IN: signal transduction, apoptosis, defense response, innate immune response; LOCATED IN: intr…	AAA+ ATPase domain | Leucine-rich repeat | Leucine-rich repeat 3 | NB-ARC | P-loop containing nucleoside triphosphate hydrolase | Toll/interleukin-1 receptor homology (TIR) domain	NO
AT1G63855	-0.993698	2.0109	0.00352549	0.0456876	DOWN	Putative methyltransferase family protein	Putative methyltransferase family protein; CONTAINS InterPro DOMAIN/s: Methyltransferase-16, putative (InterPro:IPR019410); BEST Arabidopsis thaliana protein match is: S-adenosyl-L-methionine-dependent methyltransferases superfamily protein (TAIR:AT5G27400.1)	Nicotinamide N-methyltransferase-like | S-adenosyl-L-methionine-dependent methyltransferase-like	NO
AT1G63930	1.89203	0.214532	0.000447311	0.00856091	UP	from the Czech 'roh' meaning 'corner'	from the Czech 'roh' meaning 'corner' (ROH1); CONTAINS InterPro DOMAIN/s: Protein BYPASS related (InterPro:IPR008511); BEST Arabidopsis thaliana protein match is: Protein of unknown function (DUF793) (TAIR:AT4G23530.1)	Protein BYPASS-related	NO
AT1G64110	-1.42732	6.69984	1.91564e-06	8.86275e-05	DOWN	P-loop containing nucleoside triphosphate hydrolases superfamily protein	P-loop containing nucleoside triphosphate hydrolases superfamily protein; FUNCTIONS IN: nucleoside-triphosphatase activity, ATPase activity, nucleotide binding, ATP binding; LOCATED IN: endomembrane system; EXPRESSED IN: 8 plant structures; EXPRESSED DURING: L mature pollen stage, M germinated pollen stage, LP.04 four leaves visible, 4 anthesis, petal differentiation and expansion stage; CONTAINS…	AAA+ ATPase domain | ATPase, AAA-type, conserved site | ATPase, AAA-type, core | P-loop containing nucleoside triphosphate hydrolase	NO
AT1G64255	5.60499	-2.41833	0.000115223	0.00280203	UP	MuDR family transposase	MuDR family transposase; FUNCTIONS IN: zinc ion binding; INVOLVED IN: biological_process unknown; LOCATED IN: cellular_component unknown; CONTAINS InterPro DOMAIN/s: MULE transposase, conserved domain (InterPro:IPR018289), Zinc finger, SWIM-type (InterPro:IPR007527), Zinc finger, PMZ-type (InterPro:IPR006564), Transposase, MuDR, plant (InterPro:IPR004332); BEST Arabidopsis thaliana protein match …	MULE transposase domain | Transposase, MuDR, plant | Zinc finger, PMZ-type | Zinc finger, SWIM-type	NO
AT1G64330	1.17468	5.31435	3.21221e-06	0.000139697	UP	myosin heavy chain-related	myosin heavy chain-related; FUNCTIONS IN: molecular_function unknown; INVOLVED IN: biological_process unknown; LOCATED IN: plasma membrane, vacuole; EXPRESSED IN: 23 plant structures; EXPRESSED DURING: 13 growth stages; BEST Arabidopsis thaliana protein match is: COP1-interactive protein 1 (TAIR:AT5G41790.1)		NO
AT1G64370	-1.86994	7.56981	4.97908e-13	1.118e-10	DOWN		unknown protein		NO
AT1G64405	1.58457	1.15982	0.00138596	0.0213739	UP		unknown protein		NO
AT1G64440	0.781829	4.76249	0.00144719	0.0221056	UP	NAD(P)-binding Rossmann-fold superfamily protein	ROOT HAIR DEFECTIVE 1 (RHD1); CONTAINS InterPro DOMAIN/s: NAD-dependent epimerase/dehydratase (InterPro:IPR001509), NAD(P)-binding domain (InterPro:IPR016040), UDP-glucose 4-epimerase (InterPro:IPR005886); BEST Arabidopsis thaliana protein match is: UDP-D-glucose/UDP-D-galactose 4-epimerase 5 (TAIR:AT4G10960.1)	NAD(P)-binding domain | NAD-dependent epimerase/dehydratase, N-terminal domain | UDP-glucose 4-epimerase C-terminal domain | UDP-glucose 4-epimerase GalE	NO
AT1G64460	0.974195	5.42597	2.49622e-05	0.000793163	UP	Protein kinase superfamily protein	Protein kinase superfamily protein; FUNCTIONS IN: inositol or phosphatidylinositol kinase activity, phosphotransferase activity, alcohol group as acceptor; INVOLVED IN: biological_process unknown; LOCATED IN: vacuole; EXPRESSED IN: 24 plant structures; EXPRESSED DURING: 15 growth stages; CONTAINS InterPro DOMAIN/s: Phosphatidylinositol 3-/4-kinase, catalytic (InterPro:IPR000403); BEST Arabidopsis…		NO
AT1G64480	2.47621	1.12483	3.60434e-08	2.68579e-06	UP	calcineurin B-like protein 8	calcineurin B-like protein 8 (CBL8); CONTAINS InterPro DOMAIN/s: EF-Hand 1, calcium-binding site (InterPro:IPR018247), Calcineurin B protein (InterPro:IPR015757), Recoverin (InterPro:IPR001125), Calcium-binding EF-hand (InterPro:IPR002048), EF-hand-like domain (InterPro:IPR011992), EF-hand (InterPro:IPR018248), EF-HAND 2 (InterPro:IPR018249); BEST Arabidopsis thaliana protein match is: Calcium-bi…	Calcineurin B protein | EF-Hand 1, calcium-binding site | EF-hand domain | EF-hand domain pair	NO
AT1G64770	-0.764772	6.01499	0.00109948	0.0178208	DOWN	NDH-dependent cyclic electron flow 1	NDH-dependent cyclic electron flow 1 (NDF2); BEST Arabidopsis thaliana protein match is: NDH-dependent cyclic electron flow 5 (TAIR:AT1G55370.2); FUNCTIONS IN: carbohydrate binding, catalytic activity; INVOLVED IN: photosynthetic electron transport in photosystem I; LOCATED IN: chloroplast thylakoid membrane, chloroplast, NAD(P)H dehydrogenase complex (plastoquinone); EXPRESSED IN: 21 plant struc…	Galactose mutarotase-like domain | Glycoside hydrolase-type carbohydrate-binding, subgroup	YES	1:24057102:T-TA;exonic_variant
AT1G64780	1.20182	3.42386	0.000365643	0.00729574	UP	ammonium transporter 1;2	ammonium transporter 1;2 (AMT1;2); CONTAINS InterPro DOMAIN/s: Ammonium transporter (InterPro:IPR001905), Ammonium transporter, conserved site (InterPro:IPR018047); BEST Arabidopsis thaliana protein match is: ammonium transporter 1;1 (TAIR:AT4G13510.1)	Ammonium transporter | Ammonium transporter AmtB-like domain | Ammonium transporter, conserved site | Ammonium/urea transporter	NO
AT1G64920	1.74576	0.153435	0.000361978	0.00723547	UP	UDP-Glycosyltransferase superfamily protein	UDP-Glycosyltransferase superfamily protein; FUNCTIONS IN: transferase activity, transferring glycosyl groups; INVOLVED IN: metabolic process; LOCATED IN: cellular_component unknown; EXPRESSED IN: root; CONTAINS InterPro DOMAIN/s: UDP-glucuronosyl/UDP-glucosyltransferase (InterPro:IPR002213); BEST Arabidopsis thaliana protein match is: UDP-Glycosyltransferase superfamily protein (TAIR:AT1G64910.1)	UDP-glucuronosyl/UDP-glucosyltransferase	NO
AT1G64930	1.89324	0.630347	0.000181796	0.00409296	UP	cytochrome P450, family 87, subfamily A, polypeptide 7	cytochrome P450, family 87, subfamily A, polypeptide 7 (CYP89A7); FUNCTIONS IN: electron carrier activity, monooxygenase activity, iron ion binding, oxygen binding, heme binding; INVOLVED IN: oxidation reduction; CONTAINS InterPro DOMAIN/s: Cytochrome P450 (InterPro:IPR001128), Cytochrome P450, conserved site (InterPro:IPR017972), Cytochrome P450, E-class, group I (InterPro:IPR002401); BEST Arabi…	Cytochrome P450 | Cytochrome P450, E-class, group I | Cytochrome P450, conserved site	NO
AT1G65110	-5.95682	-0.687004	4.28631e-09	4.05603e-07	DOWN	Ubiquitin carboxyl-terminal hydrolase-related protein	Ubiquitin carboxyl-terminal hydrolase-related protein; FUNCTIONS IN: ubiquitin thiolesterase activity, zinc ion binding; INVOLVED IN: ubiquitin-dependent protein catabolic process; LOCATED IN: intracellular; CONTAINS InterPro DOMAIN/s: Protein of unknown function DUF627 (InterPro:IPR006866), Peptidase C19, ubiquitin carboxyl-terminal hydrolase 2 (InterPro:IPR001394), Zinc finger, C2H2-type (Inter…	Domain of unknown function DUF627, N-terminal | Domain of unknown function DUF629 | Peptidase C19, ubiquitin carboxyl-terminal hydrolase | Zinc finger, C2H2 | Zinc finger, C2H2-like	NO
AT1G65120	-1.9195	0.857843	3.74293e-05	0.00111055	DOWN	Ubiquitin carboxyl-terminal hydrolase-related protein	Ubiquitin carboxyl-terminal hydrolase-related protein; FUNCTIONS IN: ubiquitin thiolesterase activity, zinc ion binding; INVOLVED IN: ubiquitin-dependent protein catabolic process; LOCATED IN: intracellular; CONTAINS InterPro DOMAIN/s: Protein of unknown function DUF627 (InterPro:IPR006866), Peptidase C19, ubiquitin carboxyl-terminal hydrolase 2 (InterPro:IPR001394), Zinc finger, C2H2-type (Inter…	Domain of unknown function DUF627, N-terminal | Domain of unknown function DUF629 | Peptidase C19, ubiquitin carboxyl-terminal hydrolase | Zinc finger, C2H2 | Zinc finger, C2H2-like	NO
AT1G65150	-1.00158	2.29616	0.00254111	0.0351777	DOWN	TRAF-like family protein	TRAF-like family protein; CONTAINS InterPro DOMAIN/s: TRAF-like (InterPro:IPR008974), MATH (InterPro:IPR002083); BEST Arabidopsis thaliana protein match is: TRAF-like superfamily protein (TAIR:AT1G65050.1)	MATH | TRAF-like	NO
AT1G65190	-2.17473	4.46266	1.17954e-12	2.39326e-10	DOWN	Protein kinase superfamily protein	Protein kinase superfamily protein; FUNCTIONS IN: protein kinase activity, ATP binding; INVOLVED IN: protein amino acid phosphorylation; LOCATED IN: cellular_component unknown; CONTAINS InterPro DOMAIN/s: Protein kinase, catalytic domain (InterPro:IPR000719), Serine-threonine/tyrosine-protein kinase (InterPro:IPR001245), Protein kinase-like domain (InterPro:IPR011009); BEST Arabidopsis thaliana p…	Protein kinase domain | Protein kinase-like domain | Serine-threonine/tyrosine-protein kinase catalytic domain	NO
AT1G65300	-5.21796	-1.136	0.00155887	0.0235446	DOWN	AGAMOUS-like 38	AGAMOUS-like 38 (AGL38); FUNCTIONS IN: DNA binding, sequence-specific DNA binding transcription factor activity; INVOLVED IN: regulation of transcription, DNA-dependent; LOCATED IN: nucleus; EXPRESSED IN: endosperm; CONTAINS InterPro DOMAIN/s: Transcription factor, MADS-box (InterPro:IPR002100); BEST Arabidopsis thaliana protein match is: MADS-box transcription factor family protein (TAIR:AT1G653…	Transcription factor, MADS-box	NO
AT1G65310	1.87339	3.50243	2.0062e-06	9.1933e-05	UP	xyloglucan endotransglucosylase/hydrolase 17	xyloglucan endotransglucosylase/hydrolase 17 (XTH17); CONTAINS InterPro DOMAIN/s: Xyloglucan endotransglucosylase/hydrolase (InterPro:IPR016455), Beta-glucanase (InterPro:IPR008264), Xyloglucan endo-transglycosylase, C-terminal (InterPro:IPR010713), Concanavalin A-like lectin/glucanase, subgroup (InterPro:IPR013320), Glycoside hydrolase, family 16, active site (InterPro:IPR008263), Concanavalin A…	Beta-glucanase | Concanavalin A-like lectin/glucanase, subgroup | Concanavalin A-like lectin/glucanases superfamily | Glycoside hydrolase, family 16 | Glycoside hydrolase, family 16, active site | Xyloglucan endo-transglycosylase, C-terminal | Xyloglucan endotransglucosylase/hydrolase	NO
AT1G65330	-7.26212	-1.00586	0.00074994	0.0130133	DOWN	MADS-box transcription factor family protein	PHERES1 (PHE1); CONTAINS InterPro DOMAIN/s: Transcription factor, MADS-box (InterPro:IPR002100); BEST Arabidopsis thaliana protein match is: AGAMOUS-like 38 (TAIR:AT1G65300.1)	Transcription factor, MADS-box	NO
AT1G65610	2.00585	3.03554	7.54368e-09	6.59944e-07	UP	Six-hairpin glycosidases superfamily protein	KORRIGAN 2 (KOR2); FUNCTIONS IN: hydrolase activity, hydrolyzing O-glycosyl compounds, catalytic activity; INVOLVED IN: carbohydrate metabolic process; LOCATED IN: cellular_component unknown; EXPRESSED IN: stem, sepal, root, leaf, stamen; EXPRESSED DURING: LP.06 six leaves visible, 4 anthesis, petal differentiation and expansion stage, LP.08 eight leaves visible; CONTAINS InterPro DOMAIN/s: Six-h…	Glycoside hydrolase, family 9 | Glycoside hydrolase, family 9, active site | Six-hairpin glycosidase | Six-hairpin glycosidase-like	NO
AT1G65680	7.64834	-0.864817	1.58547e-12	3.15977e-10	UP	expansin B2	expansin B2 (EXPB2); INVOLVED IN: plant-type cell wall modification involved in multidimensional cell growth, unidimensional cell growth, plant-type cell wall loosening; LOCATED IN: endomembrane system, extracellular region; EXPRESSED IN: root; CONTAINS InterPro DOMAIN/s: Barwin-related endoglucanase (InterPro:IPR009009), Pollen allergen, N-terminal (InterPro:IPR014734), Rare lipoprotein A (Inter…	Barwin-like endoglucanase | Expansin, cellulose-binding-like domain | Expansin/Lol pI | Expansin/pollen allergen, DPBB domain | Major pollen allergen Lol pI | RlpA-like double-psi beta-barrel domain	NO
AT1G65800	-2.06306	4.67734	7.83103e-14	2.16866e-11	DOWN	receptor kinase 2	receptor kinase 2 (RK2); CONTAINS InterPro DOMAIN/s: Curculin-like (mannose-binding) lectin (InterPro:IPR001480), Apple-like (InterPro:IPR003609), PAN-2 domain (InterPro:IPR013227), Protein kinase, ATP binding site (InterPro:IPR017441), S-locus receptor kinase, C-terminal (InterPro:IPR021820), Serine/threonine-protein kinase domain (InterPro:IPR002290), Serine-threonine/tyrosine-protein kinase (I…	Apple-like | Bulb-type lectin domain | Concanavalin A-like lectin/glucanase, subgroup | Epidermal growth factor-like domain | PAN-2 domain | Protein kinase domain | Protein kinase, ATP binding site | Protein kinase-like domain | S-locus glycoprotein | S-locus receptor kinase, C-terminal | S-locus, receptor kinase | S-receptor-like serine/threonine-protein kinase | Serine-threonine/tyrosine-protei…	NO
AT1G65860	-1.92303	2.3261	0.000258501	0.00549311	DOWN	flavin-monooxygenase glucosinolate S-oxygenase 1	flavin-monooxygenase glucosinolate S-oxygenase 1 (FMO GS-OX1); CONTAINS InterPro DOMAIN/s: Flavin-containing monooxygenase FMO (InterPro:IPR000960), Flavin-containing monooxygenase-like (InterPro:IPR020946); BEST Arabidopsis thaliana protein match is: flavin-monooxygenase glucosinolate S-oxygenase 2 (TAIR:AT1G62540.1)	Flavin monooxygenase FMO | Flavin monooxygenase-like	YES	1:24500421:G-A;protein_coding;missense;GCG>GTG;A>V
AT1G66060	-3.82674	-0.269987	3.90304e-07	2.23568e-05	DOWN	Family of unknown function (DUF577)	Family of unknown function (DUF577); CONTAINS InterPro DOMAIN/s: Protein of unknown function DUF577 (InterPro:IPR007598); BEST Arabidopsis thaliana protein match is: Family of unknown function (DUF577) (TAIR:AT1G66000.1)	Armadillo-type fold | Protein of unknown function DUF577	NO
AT1G66270	1.71007	6.49658	1.50491e-07	9.56358e-06	UP	Glycosyl hydrolase superfamily protein	BGLU21; FUNCTIONS IN: beta-glucosidase activity, hydrolase activity, hydrolyzing O-glycosyl compounds; INVOLVED IN: cellular response to phosphate starvation, response to salt stress, cellular response to cold, cellular response to salt stress, response to osmotic stress; LOCATED IN: vacuole, membrane; EXPRESSED IN: root, callus, leaf; EXPRESSED DURING: seedling growth; CONTAINS InterPro DOMAIN/s…	Glycoside hydrolase, catalytic domain | Glycoside hydrolase, family 1 | Glycoside hydrolase, family 1, active site | Glycoside hydrolase, superfamily	NO
AT1G66450	-3.57864	-1.49274	0.000610536	0.0110556	DOWN	Cysteine/Histidine-rich C1 domain family protein	Cysteine/Histidine-rich C1 domain family protein; FUNCTIONS IN: zinc ion binding; INVOLVED IN: biological_process unknown; LOCATED IN: cellular_component unknown; EXPRESSED IN: 7 plant structures; EXPRESSED DURING: 4 leaf senescence stage, petal differentiation and expansion stage; CONTAINS InterPro DOMAIN/s: DC1 (InterPro:IPR004146), Zinc finger, PHD-type (InterPro:IPR001965), C1-like (InterPro:…	C1-like | DC1 | Zinc finger, PHD-type | Zinc finger, RING/FYVE/PHD-type	NO
AT1G66470	1.73846	1.39263	1.45888e-05	0.000507084	UP	ROOT HAIR DEFECTIVE6	ROOT HAIR DEFECTIVE6 (RHD6); CONTAINS InterPro DOMAIN/s: Helix-loop-helix DNA-binding domain (InterPro:IPR001092), Helix-loop-helix DNA-binding (InterPro:IPR011598); BEST Arabidopsis thaliana protein match is: RHD SIX-LIKE 1 (TAIR:AT5G37800.1)	Myc-type, basic helix-loop-helix (bHLH) domain	NO
AT1G66730	-0.817687	5.15534	0.000320037	0.00654871	DOWN	DNA LIGASE 6	DNA LIGASE 6 (LIG6); FUNCTIONS IN: DNA binding, DNA ligase (ATP) activity, ATP binding; INVOLVED IN: DNA repair, seed germination, DNA recombination, DNA replication; LOCATED IN: chloroplast; EXPRESSED IN: 16 plant structures; EXPRESSED DURING: 9 growth stages; CONTAINS InterPro DOMAIN/s: Nucleic acid-binding, OB-fold (InterPro:IPR012340), DNA ligase, N-terminal (InterPro:IPR012308), DNA repair m…	Beta-lactamase-like | DNA ligase, ATP-dependent | DNA ligase, ATP-dependent, C-terminal | DNA ligase, ATP-dependent, N-terminal | DNA ligase, ATP-dependent, central | DNA ligase, ATP-dependent, conserved site | DNA repair metallo-beta-lactamase | Nucleic acid-binding, OB-fold	YES	1:24885735:G-A;protein_coding;missense;GCT>ACT;A>T,1:24885331:C-A;protein_coding;missense;GCA>GAA;A>E,1:24885356:A-T;protein_coding;missense;CAA>CAT;Q>H,1:24885281:C-T;protein_coding;sense;TCC>TCT;S>S,1:24885373:C-A;protein_coding;missense;CCT>CAT;P>H,1:24885120:T-C;protein_coding;missense;TCA>CCA;S>P,1:24885727:T-G;protein_coding;missense;GTT>GGT;V>G,1:24885614:T-C;protein_coding;sense;TTT>TTC;F…
AT1G66795	3.1279	-1.87804	0.00026457	0.00559385	UP	MIR157B; miRNA			NO
AT1G66950	1.91712	-0.692495	0.00113519	0.0182573	UP	pleiotropic drug resistance 11	pleiotropic drug resistance 11 (PDR11); FUNCTIONS IN: ATPase activity, coupled to transmembrane movement of substances; INVOLVED IN: drug transmembrane transport; LOCATED IN: membrane; EXPRESSED IN: 9 plant structures; EXPRESSED DURING: 4 anthesis, C globular stage, petal differentiation and expansion stage; CONTAINS InterPro DOMAIN/s: ATPase, AAA+ type, core (InterPro:IPR003593), ABC transporter…	AAA+ ATPase domain | ABC transporter-like | ABC-2 type transporter | ABC-transporter extracellular N-terminal domain | P-loop containing nucleoside triphosphate hydrolase | Plant PDR ABC transporter associated	NO
AT1G66960	2.9163	-1.98764	0.000886555	0.01496	UP	Terpenoid cyclases family protein	Terpenoid cyclases family protein; CONTAINS InterPro DOMAIN/s: Terpene synthase, conserved site (InterPro:IPR002365), Terpenoid cylases/protein prenyltransferase alpha-alpha toroid (InterPro:IPR008930), Squalene cyclase (InterPro:IPR018333), Prenyltransferase/squalene oxidase (InterPro:IPR001330); BEST Arabidopsis thaliana protein match is: lupeol synthase 2 (TAIR:AT1G78960.1)	Prenyltransferase/squalene oxidase | Squalene cyclase | Terpene synthase, conserved site | Terpenoid cyclases/protein prenyltransferase alpha-alpha toroid	NO
AT1G67025	-2.98205	-1.68274	0.000624432	0.011283	DOWN		FUNCTIONS IN: molecular_function unknown; INVOLVED IN: biological_process unknown; LOCATED IN: cellular_component unknown; BEST Arabidopsis thaliana protein match is: Protein kinase superfamily protein (TAIR:AT1G18390.1)	Wall-associated receptor kinase galacturonan-binding domain	NO
AT1G67030	1.20784	3.84352	2.02144e-05	0.000667492	UP	zinc finger protein 6	zinc finger protein 6 (ZFP6); FUNCTIONS IN: sequence-specific DNA binding transcription factor activity, zinc ion binding, nucleic acid binding; INVOLVED IN: regulation of transcription; LOCATED IN: cytosolic ribosome; EXPRESSED IN: 7 plant structures; EXPRESSED DURING: 4 anthesis, petal differentiation and expansion stage; CONTAINS InterPro DOMAIN/s: Zinc finger, C2H2-like (InterPro:IPR015880), …	Zinc finger, C2H2 | Zinc finger, C2H2-like	NO
AT1G67105	0.769475	4.25692	0.00361278	0.046568	UP	other RNA			YES	1:25058254:G-GA;exonic_variant
AT1G67220	5.27317	1.25226	3.58216e-19	2.46226e-16	UP	histone acetyltransferase of the CBP family 2	histone acetyltransferase of the CBP family 2 (HAC2); FUNCTIONS IN: histone acetyltransferase activity, transcription cofactor activity, DNA binding; INVOLVED IN: regulation of transcription, DNA-dependent; LOCATED IN: nucleus; EXPRESSED IN: shoot apical meristem, root, flower, leaf; CONTAINS InterPro DOMAIN/s: Histone H3-K56 acetyltransferase, RTT109 (InterPro:IPR013178), Zinc finger, TAZ-type (…	Histone H3-K56 acetyltransferase, RTT109 | Zinc finger, FYVE/PHD-type | Zinc finger, PHD-finger | Zinc finger, PHD-type | Zinc finger, RING/FYVE/PHD-type | Zinc finger, TAZ-type | Zinc finger, ZZ-type	NO
AT1G67360	0.975327	4.19655	0.00121509	0.0192319	UP	Rubber elongation factor protein (REF)	Rubber elongation factor protein (REF); INVOLVED IN: biological_process unknown; LOCATED IN: vacuole; EXPRESSED IN: 24 plant structures; EXPRESSED DURING: 15 growth stages; CONTAINS InterPro DOMAIN/s: Rubber elongation factor (InterPro:IPR008802); BEST Arabidopsis thaliana protein match is: Rubber elongation factor protein (REF) (TAIR:AT2G47780.1)	Rubber elongation factor	NO
AT1G67780	1.50242	1.91513	5.12855e-05	0.00144186	UP	Zinc-finger domain of monoamine-oxidase A repressor R1 protein	Zinc-finger domain of monoamine-oxidase A repressor R1 protein; CONTAINS InterPro DOMAIN/s: DDT domain superfamily (InterPro:IPR018501), DDT domain, subgroup (InterPro:IPR018500), Cell division cycle-associated protein (InterPro:IPR018866); BEST Arabidopsis thaliana protein match is: Zinc-finger domain of monoamine-oxidase A repressor R1 protein (TAIR:AT1G67270.1)	DDT domain superfamily | DDT domain, subgroup | Zinc-finger domain of monoamine-oxidase A repressor R1	NO
AT1G67800	1.14856	4.38681	3.69683e-05	0.00110257	UP	Copine (Calcium-dependent phospholipid-binding protein) family	Copine (Calcium-dependent phospholipid-binding protein) family; FUNCTIONS IN: zinc ion binding; INVOLVED IN: N-terminal protein myristoylation; EXPRESSED IN: 19 plant structures; EXPRESSED DURING: 10 growth stages; CONTAINS InterPro DOMAIN/s: Zinc finger, RING-type (InterPro:IPR001841), Copine (InterPro:IPR010734), von Willebrand factor, type A (InterPro:IPR002035); BEST Arabidopsis thaliana prot…	Copine | Zinc finger, RING-type | Zinc finger, RING/FYVE/PHD-type | von Willebrand factor, type A	NO
AT1G68120	2.72827	1.87717	3.36887e-11	5.06548e-09	UP	basic pentacysteine 3	basic pentacysteine 3 (BPC3); CONTAINS InterPro DOMAIN/s: GAGA binding-like (InterPro:IPR010409); BEST Arabidopsis thaliana protein match is: basic pentacysteine1 (TAIR:AT2G01930.2)		NO
AT1G68440	2.15472	6.11543	8.93345e-13	1.86887e-10	UP		unknown protein; BEST Arabidopsis thaliana protein match is: unknown protein (TAIR:AT1G25400.2)		NO
AT1G68520	-0.867522	7.70314	0.000160708	0.00369223	DOWN	B-box type zinc finger protein with CCT domain	B-box type zinc finger protein with CCT domain; FUNCTIONS IN: sequence-specific DNA binding transcription factor activity, zinc ion binding; INVOLVED IN: regulation of transcription; LOCATED IN: intracellular; EXPRESSED IN: 21 plant structures; EXPRESSED DURING: 13 growth stages; CONTAINS InterPro DOMAIN/s: CCT domain (InterPro:IPR010402), Zinc finger, B-box (InterPro:IPR000315); BEST Arabidopsis…	CCT domain | Zinc finger, B-box	NO
AT1G68540	-0.977624	3.00401	0.00119187	0.0189266	DOWN	NAD(P)-binding Rossmann-fold superfamily protein	NAD(P)-binding Rossmann-fold superfamily protein; FUNCTIONS IN: coenzyme binding, oxidoreductase activity, binding, catalytic activity; INVOLVED IN: cellular metabolic process, metabolic process; LOCATED IN: cellular_component unknown; EXPRESSED IN: 21 plant structures; EXPRESSED DURING: 13 growth stages; CONTAINS InterPro DOMAIN/s: NAD-dependent epimerase/dehydratase (InterPro:IPR001509), NAD(P)…	NAD(P)-binding domain | NAD-dependent epimerase/dehydratase, N-terminal domain	NO
AT1G68825	1.59516	0.611635	8.18359e-05	0.00210889	UP	ROTUNDIFOLIA like 15	ROTUNDIFOLIA like 15 (RTFL15); INVOLVED IN: shoot development; EXPRESSED IN: stem, root, flower, leaf; CONTAINS InterPro DOMAIN/s: DVL (InterPro:IPR012552); BEST Arabidopsis thaliana protein match is: ROTUNDIFOLIA like 17 (TAIR:AT1G13245.1)	DVL	NO
AT1G68850	1.45129	2.12436	0.000141891	0.00334291	UP	Peroxidase superfamily protein	Peroxidase superfamily protein; FUNCTIONS IN: peroxidase activity, heme binding; INVOLVED IN: oxidation reduction, response to oxidative stress; LOCATED IN: endomembrane system; EXPRESSED IN: hypocotyl, root; CONTAINS InterPro DOMAIN/s: Haem peroxidase (InterPro:IPR010255), Plant peroxidase (InterPro:IPR000823), Peroxidases heam-ligand binding site (InterPro:IPR019793), Haem peroxidase, plant/fun…	Haem peroxidase | Haem peroxidase, plant/fungal/bacterial | Peroxidase, active site | Peroxidases heam-ligand binding site | Plant peroxidase	NO
AT1G68940	1.06096	1.50156	0.0031655	0.0419918	UP	Armadillo/beta-catenin-like repeat family protein	Armadillo/beta-catenin-like repeat family protein; FUNCTIONS IN: ubiquitin-protein ligase activity, binding; INVOLVED IN: protein ubiquitination; LOCATED IN: ubiquitin ligase complex; EXPRESSED IN: root; CONTAINS InterPro DOMAIN/s: U box domain (InterPro:IPR003613), Armadillo-like helical (InterPro:IPR011989), Armadillo (InterPro:IPR000225), Armadillo-type fold (InterPro:IPR016024); BEST Arabidop…		NO
AT1G69310	1.04155	4.5929	0.0012958	0.0202524	UP	WRKY DNA-binding protein 57	WRKY DNA-binding protein 57 (WRKY57); CONTAINS InterPro DOMAIN/s: DNA-binding WRKY (InterPro:IPR003657); BEST Arabidopsis thaliana protein match is: WRKY DNA-binding protein 48 (TAIR:AT5G49520.1)	DNA-binding WRKY	NO
AT1G69540	1.38486	1.18835	0.000678913	0.0120292	UP	AGAMOUS-like 94	AGAMOUS-like 94 (AGL94); FUNCTIONS IN: DNA binding, sequence-specific DNA binding transcription factor activity; INVOLVED IN: regulation of transcription, DNA-dependent; LOCATED IN: nucleus; CONTAINS InterPro DOMAIN/s: Transcription factor, MADS-box (InterPro:IPR002100); BEST Arabidopsis thaliana protein match is: AGAMOUS-like 30 (TAIR:AT2G03060.2)	Transcription factor, MADS-box	NO
AT1G69710	2.60613	1.08228	5.8535e-09	5.29978e-07	UP	Regulator of chromosome condensation (RCC1) family with FYVE zinc finger domain	Regulator of chromosome condensation (RCC1) family with FYVE zinc finger domain; FUNCTIONS IN: chromatin binding, zinc ion binding, Ran GTPase binding; LOCATED IN: cellular_component unknown; CONTAINS InterPro DOMAIN/s: Zinc finger, FYVE-type (InterPro:IPR000306), Regulator of chromosome condensation/beta-lactamase-inhibitor protein II (InterPro:IPR009091), Zinc finger, FYVE-related (InterPro:IPR…	Brevis radix (BRX) domain | FYVE zinc finger | Pleckstrin homology domain | Pleckstrin homology domain, Mcp5-type | Pleckstrin homology-like domain | Regulator of chromosome condensation 1/beta-lactamase-inhibitor protein II | Regulator of chromosome condensation, RCC1 | Transcription factor BREVIS RADIX, N-terminal domain | Zinc finger, FYVE-related | Zinc finger, FYVE/PHD-type | Zinc finger, RI…	NO
AT1G69810	1.07708	2.9142	0.000793251	0.0136383	UP	WRKY DNA-binding protein 36	WRKY DNA-binding protein 36 (WRKY36); CONTAINS InterPro DOMAIN/s: DNA-binding WRKY (InterPro:IPR003657); BEST Arabidopsis thaliana protein match is: WRKY family transcription factor (TAIR:AT4G04450.1)	DNA-binding WRKY	NO
AT1G69870	-1.4389	5.63121	9.4022e-05	0.00237033	DOWN	nitrate transporter 1.7	nitrate transporter 1.7 (NRT1.7); FUNCTIONS IN: low affinity nitrate transmembrane transporter activity, transporter activity; INVOLVED IN: oligopeptide transport, response to salt stress, nitrate transport, low affinity nitrate transport; LOCATED IN: plasma membrane, membrane; EXPRESSED IN: 23 plant structures; EXPRESSED DURING: 13 growth stages; CONTAINS InterPro DOMAIN/s: Oligopeptide transpor…	Major facilitator superfamily domain, general substrate transporter | Proton-dependent oligopeptide transporter family	NO
AT1G69890	-1.5717	5.00764	1.9069e-06	8.84301e-05	DOWN	Protein of unknown function (DUF569)	CONTAINS InterPro DOMAIN/s: Protein of unknown function DUF569 (InterPro:IPR007679), Actin cross-linking (InterPro:IPR008999); BEST Arabidopsis thaliana protein match is: Actin cross-linking protein (TAIR:AT1G27100.1)	Actin cross-linking | Protein of unknown function DUF569	NO
AT1G70100	0.888034	6.31679	8.2373e-05	0.00211694	UP		unknown protein; FUNCTIONS IN: molecular_function unknown; INVOLVED IN: biological_process unknown; LOCATED IN: cellular_component unknown; EXPRESSED IN: 22 plant structures; EXPRESSED DURING: 13 growth stages; BEST Arabidopsis thaliana protein match is: unknown protein (TAIR:AT1G24160.2)		NO
AT1G70185	5.1004	-2.69886	0.00166909	0.0248389	UP	other RNA			NO
AT1G70260	3.60007	-0.636682	0.00215678	0.0307617	UP	nodulin MtN21 /EamA-like transporter family protein	nodulin MtN21 /EamA-like transporter family protein; FUNCTIONS IN: molecular_function unknown; LOCATED IN: endomembrane system, membrane; CONTAINS InterPro DOMAIN/s: Protein of unknown function DUF6, transmembrane (InterPro:IPR000620); BEST Arabidopsis thaliana protein match is: Nodulin MtN21 /EamA-like transporter family protein (TAIR:AT1G60050.1)	Drug/metabolite transporter	NO
AT1G70420	-1.18492	4.37018	9.18487e-07	4.73021e-05	DOWN	Protein of unknown function (DUF1645)	Protein of unknown function (DUF1645); CONTAINS InterPro DOMAIN/s: Protein of unknown function DUF1645 (InterPro:IPR012442); BEST Arabidopsis thaliana protein match is: Protein of unknown function (DUF1645) (TAIR:AT1G23710.1)	Protein of unknown function DUF1645, plant	NO
AT1G70460	2.05914	2.6708	7.8861e-05	0.00204632	UP	root hair specific 10	root hair specific 10 (RHS10); FUNCTIONS IN: protein serine/threonine kinase activity, protein kinase activity, ATP binding; INVOLVED IN: protein amino acid phosphorylation; LOCATED IN: membrane; EXPRESSED IN: root hair, root; CONTAINS InterPro DOMAIN/s: Protein kinase, ATP binding site (InterPro:IPR017441), Protein kinase, catalytic domain (InterPro:IPR000719), Serine-threonine/tyrosine-protein …	Protein kinase domain | Protein kinase, ATP binding site | Protein kinase-like domain | Serine-threonine/tyrosine-protein kinase catalytic domain | Serine/threonine-protein kinase, active site	NO
AT1G70500	2.39904	2.17824	1.04865e-10	1.44752e-08	UP	Pectin lyase-like superfamily protein	Pectin lyase-like superfamily protein; FUNCTIONS IN: polygalacturonase activity; INVOLVED IN: carbohydrate metabolic process; LOCATED IN: endomembrane system; EXPRESSED IN: 6 plant structures; EXPRESSED DURING: 4 anthesis, C globular stage, petal differentiation and expansion stage; CONTAINS InterPro DOMAIN/s: Pectin lyase fold/virulence factor (InterPro:IPR011050), Pectin lyase fold (InterPro:IP…	Glycoside hydrolase, family 28 | Parallel beta-helix repeat | Pectin lyase fold | Pectin lyase fold/virulence factor	NO
AT1G70505	1.81169	4.10113	8.69265e-13	1.84137e-10	UP		unknown protein; BEST Arabidopsis thaliana protein match is: unknown protein (TAIR:AT1G10660.1)		NO
AT1G70510	2.23501	2.81441	1.14639e-09	1.22967e-07	UP	KNOTTED-like from Arabidopsis thaliana 2	KNOTTED-like from Arabidopsis thaliana 2 (KNAT2); FUNCTIONS IN: sequence-specific DNA binding transcription factor activity; INVOLVED IN: response to ethylene stimulus, cytokinin mediated signaling pathway, specification of carpel identity; LOCATED IN: nucleus; EXPRESSED IN: 16 plant structures; EXPRESSED DURING: 6 growth stages; CONTAINS InterPro DOMAIN/s: KNOX2 (InterPro:IPR005541), ELK (InterP…	ELK | Homeobox KN domain | Homeobox domain | Homeobox, conserved site | Homeodomain-like | KNOX1 | KNOX2	YES	1:26581381:G-T;intronic_variant,1:26581370:C-T;intronic_variant,1:26581366:C-T;intronic_variant
AT1G70520	-0.870161	4.86413	0.000970583	0.0160956	DOWN	cysteine-rich RLK (RECEPTOR-like protein kinase) 2	cysteine-rich RLK (RECEPTOR-like protein kinase) 2 (CRK2); FUNCTIONS IN: kinase activity; INVOLVED IN: response to ozone; LOCATED IN: plasma membrane; EXPRESSED IN: 23 plant structures; EXPRESSED DURING: 13 growth stages; CONTAINS InterPro DOMAIN/s: Protein kinase, ATP binding site (InterPro:IPR017441), Protein kinase, catalytic domain (InterPro:IPR000719), Protein of unknown function DUF26 (Inte…	Concanavalin A-like lectin/glucanase, subgroup | Gnk2-homologous domain | Protein kinase domain | Protein kinase, ATP binding site | Protein kinase-like domain | Serine/threonine-protein kinase, active site	NO
AT1G70550	1.2373	4.17222	3.2833e-06	0.00014214	UP	Protein of Unknown Function (DUF239)	Protein of Unknown Function (DUF239); INVOLVED IN: biological_process unknown; LOCATED IN: endomembrane system; EXPRESSED IN: 21 plant structures; EXPRESSED DURING: 10 growth stages; CONTAINS InterPro DOMAIN/s: Protein of unknown function DUF239, plant (InterPro:IPR004314); BEST Arabidopsis thaliana protein match is: Protein of Unknown Function (DUF239) (TAIR:AT1G23340.2)	Domain of unknown function DUF239 | Domain of unknown function DUF4409	NO
AT1G70620	-0.713931	7.10436	0.00158326	0.0237956	DOWN	cyclin-related	cyclin-related; FUNCTIONS IN: molecular_function unknown; INVOLVED IN: biological_process unknown; LOCATED IN: cellular_component unknown; EXPRESSED IN: 23 plant structures; EXPRESSED IN: 24 plant structures; EXPRESSED DURING: 13 growth stages		NO
AT1G70830	0.703226	8.84834	0.00295822	0.0398703	UP	MLP-like protein 28	MLP-like protein 28 (MLP28); FUNCTIONS IN: molecular_function unknown; INVOLVED IN: response to biotic stimulus, defense response; LOCATED IN: cellular_component unknown; EXPRESSED IN: 22 plant structures; EXPRESSED DURING: 14 growth stages; CONTAINS InterPro DOMAIN/s: Bet v I allergen (InterPro:IPR000916); BEST Arabidopsis thaliana protein match is: MLP-like protein 34 (TAIR:AT1G70850.3)	Bet v I domain | Major latex protein domain | START-like domain	NO
AT1G70885	-2.05874	0.417748	1.59423e-05	0.000546796	DOWN		pseudogene, similar to major latex-like protein, blastp match of 64% identity and 7.2e-16 P-value to GP|13172242|gb|AAK14060.1|AF239177_1|AF239177 major latex-like protein {Prunus persica}		NO
AT1G70990	2.15371	0.563926	2.00595e-06	9.1933e-05	UP	proline-rich family protein	proline-rich family protein; BEST Arabidopsis thaliana protein match is: hydroxyproline-rich glycoprotein family protein (TAIR:AT1G23040.1)		NO
AT1G71040	1.23272	5.81152	8.73036e-08	5.90456e-06	UP	Cupredoxin superfamily protein	Low Phosphate Root2 (LPR2); FUNCTIONS IN: oxidoreductase activity, copper ion binding; INVOLVED IN: cellular response to phosphate starvation, meristem maintenance; LOCATED IN: cell wall, membrane; EXPRESSED IN: 22 plant structures; EXPRESSED DURING: 13 growth stages; CONTAINS InterPro DOMAIN/s: Cupredoxin (InterPro:IPR008972), Multicopper oxidase, type 2 (InterPro:IPR011706), Multicopper oxidase…	Cupredoxin | Multicopper oxidase, type 1 | Multicopper oxidase, type 2	NO
AT1G71140	-1.66397	2.48573	4.19439e-06	0.000174625	DOWN	MATE efflux family protein	MATE efflux family protein; FUNCTIONS IN: antiporter activity, drug transmembrane transporter activity, transporter activity; INVOLVED IN: drug transmembrane transport, transmembrane transport; LOCATED IN: plasma membrane, membrane; EXPRESSED IN: 13 plant structures; EXPRESSED DURING: 8 growth stages; CONTAINS InterPro DOMAIN/s: MATE family transporter related protein (InterPro:IPR015521), Multi …	Multi antimicrobial extrusion protein	NO
AT1G71200	1.93576	2.44438	7.02671e-06	0.000273603	UP	basic helix-loop-helix (bHLH) DNA-binding superfamily protein	basic helix-loop-helix (bHLH) DNA-binding superfamily protein; FUNCTIONS IN: DNA binding, sequence-specific DNA binding transcription factor activity; INVOLVED IN: regulation of transcription; LOCATED IN: nucleus; CONTAINS InterPro DOMAIN/s: Helix-loop-helix DNA-binding domain (InterPro:IPR001092), Helix-loop-helix DNA-binding (InterPro:IPR011598); BEST Arabidopsis thaliana protein match is: basi…	Myc-type, basic helix-loop-helix (bHLH) domain	NO
AT1G71330	1.14007	2.32712	0.0012833	0.0200854	UP	non-intrinsic ABC protein 5	non-intrinsic ABC protein 5 (NAP5); FUNCTIONS IN: ATPase activity, coupled to transmembrane movement of substances, transporter activity; INVOLVED IN: transport, transmembrane transport; LOCATED IN: integral to membrane; CONTAINS InterPro DOMAIN/s: ABC transporter-like (InterPro:IPR003439), ABC transporter, transmembrane domain, type 1 (InterPro:IPR011527), ABC transporter integral membrane type …	ABC transporter type 1, transmembrane domain | ABC transporter-like | P-loop containing nucleoside triphosphate hydrolase	NO
AT1G71380	1.29922	0.98004	0.00378821	0.0483481	UP	cellulase 3	cellulase 3 (CEL3); FUNCTIONS IN: hydrolase activity, hydrolyzing O-glycosyl compounds, catalytic activity; INVOLVED IN: carbohydrate metabolic process; LOCATED IN: cell wall, plasma membrane, plant-type cell wall; EXPRESSED IN: 7 plant structures; EXPRESSED DURING: L mature pollen stage, M germinated pollen stage, 4 anthesis, petal differentiation and expansion stage; CONTAINS InterPro DOMAIN/s:…	Glycoside hydrolase, family 9 | Glycoside hydrolase, family 9, active site | Six-hairpin glycosidase | Six-hairpin glycosidase-like	NO
AT1G71400	-2.41481	2.11452	3.77021e-08	2.78475e-06	DOWN	receptor like protein 12	receptor like protein 12 (RLP12); INVOLVED IN: signal transduction, defense response; LOCATED IN: endomembrane system; EXPRESSED IN: 7 plant structures; EXPRESSED DURING: LP.04 four leaves visible, petal differentiation and expansion stage; CONTAINS InterPro DOMAIN/s: Leucine-rich repeat, typical subtype (InterPro:IPR003591), Leucine-rich repeat-containing N-terminal domain, type 2 (InterPro:IPR0…	Leucine-rich repeat | Leucine-rich repeat-containing N-terminal, type 2	NO
AT1G71530	1.66081	1.63881	3.79722e-05	0.00112385	UP	Protein kinase superfamily protein	Protein kinase superfamily protein; FUNCTIONS IN: protein serine/threonine kinase activity, protein kinase activity, kinase activity, ATP binding; INVOLVED IN: protein amino acid phosphorylation; INVOLVED IN: protein amino acid phosphorylation, N-terminal protein myristoylation; LOCATED IN: chloroplast; CONTAINS InterPro DOMAIN/s: Protein kinase, ATP binding site (InterPro:IPR017441), Protein kin…	Protein kinase domain | Protein kinase, ATP binding site | Protein kinase-like domain | Serine/threonine-protein kinase, active site | Serine/threonine/dual specificity protein kinase, catalytic domain	NO
AT1G71740	1.7832	0.929899	4.89563e-06	0.000200109	UP		unknown protein		NO
AT1G71930	1.79388	0.419981	4.3532e-05	0.00125639	UP	vascular related NAC-domain protein 7	vascular related NAC-domain protein 7 (VND7); CONTAINS InterPro DOMAIN/s: No apical meristem (NAM) protein (InterPro:IPR003441); BEST Arabidopsis thaliana protein match is: vascular related NAC-domain protein 1 (TAIR:AT2G18060.1)	NAC domain	NO
AT1G72040	-0.684854	5.92305	0.00268262	0.036894	DOWN	P-loop containing nucleoside triphosphate hydrolases superfamily protein	P-loop containing nucleoside triphosphate hydrolases superfamily protein; FUNCTIONS IN: phosphotransferase activity, alcohol group as acceptor, ATP binding; INVOLVED IN: nucleobase, nucleoside, nucleotide and nucleic acid metabolic process; LOCATED IN: nucleus; EXPRESSED IN: 23 plant structures; EXPRESSED DURING: 13 growth stages; CONTAINS InterPro DOMAIN/s: Deoxynucleoside kinase (InterPro:IPR00…	Deoxynucleoside kinase | P-loop containing nucleoside triphosphate hydrolase	NO
AT1G72125	1.80764	0.177959	0.000166666	0.00380559	UP	Major facilitator superfamily protein	Major facilitator superfamily protein; FUNCTIONS IN: transporter activity; INVOLVED IN: oligopeptide transport; LOCATED IN: membrane; EXPRESSED IN: 13 plant structures; EXPRESSED DURING: 6 growth stages; CONTAINS InterPro DOMAIN/s: PTR2 family proton/oligopeptide symporter, conserved site (InterPro:IPR018456), Oligopeptide transporter (InterPro:IPR000109), Major facilitator superfamily, general s…	Major facilitator superfamily domain, general substrate transporter | PTR2 family proton/oligopeptide symporter, conserved site | Proton-dependent oligopeptide transporter family	NO
AT1G72230	1.06767	2.66129	0.00273277	0.0375071	UP	Cupredoxin superfamily protein	Cupredoxin superfamily protein; FUNCTIONS IN: electron carrier activity, copper ion binding; LOCATED IN: anchored to membrane; EXPRESSED IN: 17 plant structures; EXPRESSED DURING: 9 growth stages; CONTAINS InterPro DOMAIN/s: Plastocyanin-like (InterPro:IPR003245), Cupredoxin (InterPro:IPR008972), Blue (type 1) copper domain (InterPro:IPR000923); BEST Arabidopsis thaliana protein match is: Cupredo…	Blue (type 1) copper protein, binding site | Cupredoxin | Plastocyanin-like	NO
AT1G72416	-0.92814	3.01469	0.00222273	0.0315084	DOWN	Chaperone DnaJ-domain superfamily protein	Chaperone DnaJ-domain superfamily protein; FUNCTIONS IN: heat shock protein binding; INVOLVED IN: biological_process unknown; LOCATED IN: cellular_component unknown; BEST Arabidopsis thaliana protein match is: Chaperone DnaJ-domain superfamily protein (TAIR:AT3G14200.1); CONTAINS InterPro DOMAIN/s: Molecular chaperone, heat shock protein, Hsp40, DnaJ (InterPro:IPR015609), Heat shock protein DnaJ,…	DnaJ domain | DnaJ domain, conserved site	NO
AT1G72520	-3.49052	2.07103	0.000471912	0.00893569	DOWN	PLAT/LH2 domain-containing lipoxygenase family protein	PLAT/LH2 domain-containing lipoxygenase family protein; FUNCTIONS IN: oxidoreductase activity, acting on single donors with incorporation of molecular oxygen, incorporation of two atoms of oxygen, lipoxygenase activity, iron ion binding, metal ion binding; INVOLVED IN: growth, jasmonic acid biosynthetic process, response to wounding, defense response; LOCATED IN: chloroplast; EXPRESSED IN: 17 pla…	Lipase/lipooxygenase, PLAT/LH2 | Lipoxygenase | Lipoxygenase, C-terminal | Lipoxygenase, conserved site | Lipoxygenase, domain 3 | Lipoxygenase, iron binding site | Lipoxygenase, plant | PLAT/LH2 domain	NO
AT1G72800	-1.04539	2.58207	0.00281491	0.038462	DOWN	RNA-binding (RRM/RBD/RNP motifs) family protein	RNA-binding (RRM/RBD/RNP motifs) family protein; FUNCTIONS IN: nucleotide binding, nucleic acid binding; INVOLVED IN: biological_process unknown; LOCATED IN: cellular_component unknown; EXPRESSED IN: 21 plant structures; EXPRESSED DURING: 10 growth stages; CONTAINS InterPro DOMAIN/s: RNA recognition motif, RNP-1 (InterPro:IPR000504), Nucleotide-binding, alpha-beta plait (InterPro:IPR012677); BEST…	Nucleotide-binding, alpha-beta plait | RNA recognition motif domain	NO
AT1G73020	0.947287	4.28844	0.000333941	0.00679194	UP		unknown protein; FUNCTIONS IN: molecular_function unknown; INVOLVED IN: biological_process unknown; LOCATED IN: cellular_component unknown; EXPRESSED IN: 22 plant structures; EXPRESSED DURING: 13 growth stages; CONTAINS InterPro DOMAIN/s: Protein of unknown function DUF590 (InterPro:IPR007632)	Anoctamin	NO
AT1G73066	1.67535	1.92911	2.18819e-06	9.95952e-05	UP	Leucine-rich repeat family protein	Leucine-rich repeat family protein; INVOLVED IN: biological_process unknown; LOCATED IN: endomembrane system; EXPRESSED IN: embryo, pedicel, carpel, stamen; EXPRESSED DURING: 4 anthesis, C globular stage, petal differentiation and expansion stage; CONTAINS InterPro DOMAIN/s: Leucine-rich repeat-containing N-terminal domain, type 2 (InterPro:IPR013210), Leucine-rich repeat (InterPro:IPR001611); BE…	Leucine-rich repeat | Leucine-rich repeat-containing N-terminal, type 2	NO
AT1G73160	1.89561	-0.102206	5.87101e-05	0.00161027	UP	UDP-Glycosyltransferase superfamily protein	UDP-Glycosyltransferase superfamily protein; FUNCTIONS IN: transferase activity, transferring glycosyl groups; INVOLVED IN: biosynthetic process; EXPRESSED IN: root; CONTAINS InterPro DOMAIN/s: Glycosyl transferase, group 1 (InterPro:IPR001296); BEST Arabidopsis thaliana protein match is: UDP-Glycosyltransferase superfamily protein (TAIR:AT4G19460.1)	Glycosyl transferase, family 1 | Glycosyltransferase subfamily 4, N-terminal domain	NO
AT1G73340	1.4276	1.02917	0.000458725	0.00874876	UP	Cytochrome P450 superfamily protein	Cytochrome P450 superfamily protein; FUNCTIONS IN: electron carrier activity, monooxygenase activity, iron ion binding, oxygen binding, heme binding; EXPRESSED IN: root; CONTAINS InterPro DOMAIN/s: Cytochrome P450 (InterPro:IPR001128), Cytochrome P450, E-class, group IV (InterPro:IPR002403), Cytochrome P450, conserved site (InterPro:IPR017972); BEST Arabidopsis thaliana protein match is: Cytochro…	Cytochrome P450 | Cytochrome P450, E-class, group IV | Cytochrome P450, conserved site	NO
AT1G73390	1.30185	6.01819	1.38468e-07	8.88334e-06	UP	Endosomal targeting BRO1-like domain-containing protein	Endosomal targeting BRO1-like domain-containing protein; FUNCTIONS IN: molecular_function unknown; INVOLVED IN: N-terminal protein myristoylation; LOCATED IN: cellular_component unknown; EXPRESSED IN: 24 plant structures; EXPRESSED DURING: 13 growth stages; CONTAINS InterPro DOMAIN/s: BRO1 (InterPro:IPR004328); BEST Arabidopsis thaliana protein match is: Endosomal targeting BRO1-like domain-conta…	BRO1 domain	NO
AT1G73400	-1.07073	1.81885	0.00337792	0.0442348	DOWN	Pentatricopeptide repeat (PPR) superfamily protein	Pentatricopeptide repeat (PPR) superfamily protein; CONTAINS InterPro DOMAIN/s: Pentatricopeptide repeat (InterPro:IPR002885); BEST Arabidopsis thaliana protein match is: Pentatricopeptide repeat (PPR) superfamily protein (TAIR:AT3G62470.1)	Pentatricopeptide repeat	NO
AT1G73410	1.67801	0.327186	0.000190278	0.00425548	UP	myb domain protein 54	myb domain protein 54 (MYB54); CONTAINS InterPro DOMAIN/s: SANT, DNA-binding (InterPro:IPR001005), Homeodomain-like (InterPro:IPR009057), Myb, DNA-binding (InterPro:IPR014778), HTH transcriptional regulator, Myb-type, DNA-binding (InterPro:IPR017930), Homeodomain-related (InterPro:IPR012287), Myb transcription factor (InterPro:IPR015495); BEST Arabidopsis thaliana protein match is: myb domain pro…	Homeodomain-like | Myb domain | SANT/Myb domain	NO
AT1G73430	1.91987	6.97139	9.94627e-17	4.78572e-14	UP	sec34-like family protein	sec34-like family protein; FUNCTIONS IN: molecular_function unknown; INVOLVED IN: intracellular protein transport; LOCATED IN: chloroplast, cis-Golgi network, membrane; LOCATED IN: chloroplast, membrane, cis-Golgi network; EXPRESSED IN: 21 plant structures; EXPRESSED DURING: 13 growth stages; CONTAINS InterPro DOMAIN/s: Sec34-like protein (InterPro:IPR007265)	Conserved oligomeric Golgi complex, subunit 3 | Cullin repeat-like-containing domain	YES	1:27605842:C-T;intronic_variant
AT1G73580	2.41965	0.97582	9.12961e-05	0.00231373	UP	Calcium-dependent lipid-binding (CaLB domain) family protein	Calcium-dependent lipid-binding (CaLB domain) family protein; CONTAINS InterPro DOMAIN/s: C2 membrane targeting protein (InterPro:IPR018029), C2 calcium/lipid-binding domain, CaLB (InterPro:IPR008973), C2 calcium-dependent membrane targeting (InterPro:IPR000008); BEST Arabidopsis thaliana protein match is: Calcium-dependent lipid-binding (CaLB domain) family protein (TAIR:AT3G17980.1)	C2 domain	NO
AT1G73600	-1.21927	4.92089	4.52235e-07	2.54711e-05	DOWN	S-adenosyl-L-methionine-dependent methyltransferases superfamily protein	S-adenosyl-L-methionine-dependent methyltransferases superfamily protein; FUNCTIONS IN: methyltransferase activity, phosphoethanolamine N-methyltransferase activity; INVOLVED IN: metabolic process; EXPRESSED IN: guard cell; CONTAINS InterPro DOMAIN/s: Methyltransferase type 11 (InterPro:IPR013216); BEST Arabidopsis thaliana protein match is: S-adenosyl-L-methionine-dependent methyltransferases su…	Methyltransferase domain | Phosphoethanolamine N-methyltransferase | S-adenosyl-L-methionine-dependent methyltransferase-like	NO
AT1G73610	4.53392	0.794872	9.64695e-19	6.24844e-16	UP	GDSL-like Lipase/Acylhydrolase superfamily protein	GDSL-like Lipase/Acylhydrolase superfamily protein; FUNCTIONS IN: lipase activity, hydrolase activity, acting on ester bonds, carboxylesterase activity; INVOLVED IN: lipid metabolic process; LOCATED IN: endomembrane system; EXPRESSED IN: central cell, embryo, sperm cell; EXPRESSED DURING: C globular stage; CONTAINS InterPro DOMAIN/s: Lipase, GDSL, active site (InterPro:IPR008265), Lipase, GDSL (I…	Lipase, GDSL | Lipase, GDSL, active site | SGNH hydrolase-type esterase domain	NO
AT1G73650	1.35553	6.251	6.0313e-09	5.43155e-07	UP	Protein of unknown function (DUF1295)	FUNCTIONS IN: oxidoreductase activity, acting on the CH-CH group of donors; INVOLVED IN: lipid metabolic process; LOCATED IN: plasma membrane; LOCATED IN: plasma membrane, vacuole; EXPRESSED IN: 24 plant structures; EXPRESSED DURING: 13 growth stages; CONTAINS InterPro DOMAIN/s: 3-oxo-5-alpha-steroid 4-dehydrogenase, C-terminal (InterPro:IPR001104), Protein of unknown function DUF1295 (InterPro:I…	3-oxo-5-alpha-steroid 4-dehydrogenase, C-terminal | Protein of unknown function DUF1295	YES	1:27689761:C-T;splice_donor_variant
AT1G73687	3.97254	1.46572	1.93146e-16	8.34019e-14	UP	MIR159/MIR159A; miRNA			NO
AT1G73690	1.39482	2.22844	6.02965e-05	0.00164175	UP	cyclin-dependent kinase D1;1	cyclin-dependent kinase D1;1 (CDKD1;1); FUNCTIONS IN: protein serine/threonine kinase activity, protein kinase activity, kinase activity, ATP binding; INVOLVED IN: cell differentiation, regulation of cell cycle; LOCATED IN: nucleus; EXPRESSED IN: shoot apex, embryo, root, flower, seed; EXPRESSED DURING: F mature embryo stage, petal differentiation and expansion stage, E expanded cotyledon stage, …	Protein kinase domain | Protein kinase, ATP binding site | Protein kinase-like domain | Serine/threonine-protein kinase, active site | Serine/threonine/dual specificity protein kinase, catalytic domain	NO
AT1G73730	0.930468	4.77762	3.70549e-05	0.00110257	UP	ETHYLENE-INSENSITIVE3-like 3	ETHYLENE-INSENSITIVE3-like 3 (EIL3); FUNCTIONS IN: DNA binding, sequence-specific DNA binding transcription factor activity; INVOLVED IN: ethylene mediated signaling pathway, cellular response to sulfate starvation, regulation of sulfur metabolic process, regulation of transcription; LOCATED IN: nucleus; EXPRESSED IN: 23 plant structures; EXPRESSED DURING: 15 growth stages; CONTAINS InterPro DOMA…	Ethylene insensitive 3-like protein, DNA-binding domain	NO
AT1G73780	2.39601	-0.576136	2.84351e-05	0.00088107	UP	Bifunctional inhibitor/lipid-transfer protein/seed storage 2S albumin superfamily protein	Bifunctional inhibitor/lipid-transfer protein/seed storage 2S albumin superfamily protein; FUNCTIONS IN: lipid binding; INVOLVED IN: lipid transport; LOCATED IN: endomembrane system; EXPRESSED IN: root; CONTAINS InterPro DOMAIN/s: Bifunctional inhibitor/plant lipid transfer protein/seed storage (InterPro:IPR016140), Plant lipid transfer protein/seed storage/trypsin-alpha amylase inhibitor (InterP…	Bifunctional inhibitor/plant lipid transfer protein/seed storage helical domain	NO
AT1G73860	1.48225	0.893383	0.000715403	0.0125171	UP	P-loop containing nucleoside triphosphate hydrolases superfamily protein	P-loop containing nucleoside triphosphate hydrolases superfamily protein; FUNCTIONS IN: microtubule motor activity, ATP binding; INVOLVED IN: microtubule-based movement; LOCATED IN: chloroplast; EXPRESSED IN: petal, sepal, male gametophyte, flower, pollen tube; EXPRESSED DURING: L mature pollen stage, M germinated pollen stage, 4 anthesis, petal differentiation and expansion stage; CONTAINS Inter…	Kinesin, motor domain | Kinesin-like protein | P-loop containing nucleoside triphosphate hydrolase	NO
AT1G74030	1.16978	4.95024	1.13543e-05	0.000409446	UP	enolase 1	enolase 1 (ENO1); FUNCTIONS IN: phosphopyruvate hydratase activity; INVOLVED IN: trichome morphogenesis; LOCATED IN: chloroplast; EXPRESSED IN: 26 plant structures; EXPRESSED DURING: 13 growth stages; CONTAINS InterPro DOMAIN/s: Enolase (InterPro:IPR000941), Enolase, C-terminal (InterPro:IPR020810), Enolase, conserved site (InterPro:IPR020809), Enolase, N-terminal (InterPro:IPR020811); BEST Arabi…	Enolase | Enolase C-terminal domain-like | Enolase N-terminal domain-like | Enolase, C-terminal | Enolase, N-terminal | Enolase, conserved site	NO
AT1G74170	0.793414	4.82458	0.0035715	0.0461949	UP	receptor like protein 13	receptor like protein 13 (RLP13); CONTAINS InterPro DOMAIN/s: Leucine-rich repeat, typical subtype (InterPro:IPR003591), Leucine-rich repeat (InterPro:IPR001611); BEST Arabidopsis thaliana protein match is: receptor like protein 15 (TAIR:AT1G74190.1)	Leucine-rich repeat	NO
AT1G74180	-1.38291	3.13508	1.77034e-05	0.000595671	DOWN	receptor like protein 14	receptor like protein 14 (RLP14); INVOLVED IN: signal transduction; LOCATED IN: chloroplast; EXPRESSED IN: 19 plant structures; EXPRESSED DURING: 13 growth stages; CONTAINS InterPro DOMAIN/s: Leucine-rich repeat, typical subtype (InterPro:IPR003591), Leucine-rich repeat-containing N-terminal domain, type 2 (InterPro:IPR013210), Leucine-rich repeat (InterPro:IPR001611); BEST Arabidopsis thaliana p…	Leucine-rich repeat | Leucine-rich repeat-containing N-terminal, type 2	NO
AT1G74460	1.78424	3.3136	1.06033e-07	6.98887e-06	UP	GDSL-like Lipase/Acylhydrolase superfamily protein	GDSL-like Lipase/Acylhydrolase superfamily protein; FUNCTIONS IN: hydrolase activity, acting on ester bonds, carboxylesterase activity; INVOLVED IN: lipid metabolic process; LOCATED IN: endomembrane system; EXPRESSED IN: shoot, hypocotyl, root, flower, carpel; EXPRESSED DURING: petal differentiation and expansion stage; CONTAINS InterPro DOMAIN/s: Lipase, GDSL (InterPro:IPR001087); BEST Arabidops…	Lipase, GDSL | SGNH hydrolase-type esterase domain	YES	1:27989320:C-T;protein_coding;missense;GGT>GAT;G>D
AT1G74490	1.49016	1.72029	0.000202116	0.00446978	UP	Protein kinase superfamily protein	Protein kinase superfamily protein; FUNCTIONS IN: protein serine/threonine kinase activity, protein kinase activity, kinase activity, ATP binding; INVOLVED IN: protein amino acid phosphorylation; LOCATED IN: cellular_component unknown; EXPRESSED IN: 13 plant structures; EXPRESSED DURING: L mature pollen stage, M germinated pollen stage, 4 anthesis, C globular stage, petal differentiation and expa…	Protein kinase domain | Protein kinase, ATP binding site | Protein kinase-like domain | Serine/threonine-protein kinase, active site	NO
AT1G74500	1.90883	2.86473	4.65394e-07	2.60814e-05	UP	activation-tagged BRI1(brassinosteroid-insensitive 1)-suppressor 1	activation-tagged BRI1(brassinosteroid-insensitive 1)-suppressor 1 (BS1); CONTAINS InterPro DOMAIN/s: Helix-loop-helix DNA-binding domain (InterPro:IPR001092), Helix-loop-helix DNA-binding (InterPro:IPR011598); BEST Arabidopsis thaliana protein match is: BANQUO 3 (TAIR:AT3G47710.1)	Myc-type, basic helix-loop-helix (bHLH) domain	NO
AT1G74510	1.18635	5.32701	5.45306e-07	3.00106e-05	UP	Galactose oxidase/kelch repeat superfamily protein	Galactose oxidase/kelch repeat superfamily protein; CONTAINS InterPro DOMAIN/s: F-box domain, cyclin-like (InterPro:IPR001810), Galactose oxidase/kelch, beta-propeller (InterPro:IPR011043), Kelch repeat type 1 (InterPro:IPR006652), Kelch related (InterPro:IPR013089), Kelch-type beta propeller (InterPro:IPR015915); BEST Arabidopsis thaliana protein match is: Galactose oxidase/kelch repeat superfam…	F-box domain | Galactose oxidase, beta-propeller | Kelch repeat type 1	NO
AT1G74680	-1.16565	3.73494	1.45347e-05	0.00050625	DOWN	Exostosin family protein	Exostosin family protein; FUNCTIONS IN: catalytic activity; INVOLVED IN: biological_process unknown; LOCATED IN: endomembrane system, membrane; EXPRESSED IN: 22 plant structures; EXPRESSED DURING: 13 growth stages; CONTAINS InterPro DOMAIN/s: Exostosin-like (InterPro:IPR004263); BEST Arabidopsis thaliana protein match is: exostosin family protein (TAIR:AT3G45400.1)	Exostosin-like	NO
AT1G74770	1.38664	3.14155	0.000207313	0.00456372	UP	zinc ion binding	zinc ion binding; FUNCTIONS IN: zinc ion binding; INVOLVED IN: biological_process unknown; LOCATED IN: cellular_component unknown; EXPRESSED IN: hypocotyl, root; CONTAINS InterPro DOMAIN/s: Zinc finger, CTCHY-type (InterPro:IPR017921), Zinc finger, CHY-type (InterPro:IPR008913), Zinc finger, RING-type (InterPro:IPR001841), Haemerythrin/HHE cation-binding motif (InterPro:IPR012312); BEST Arabidops…	Haemerythrin/HHE cation-binding motif | Rubredoxin-type fold | Zinc finger, CHY-type | Zinc finger, CTCHY-type | Zinc finger, RING-type | Zinc finger, RING/FYVE/PHD-type	NO
AT1G74810	1.70031	3.76131	1.76541e-09	1.79099e-07	UP	HCO3- transporter family	BOR5; FUNCTIONS IN: anion exchanger activity; INVOLVED IN: anion transport; LOCATED IN: integral to membrane, membrane; EXPRESSED IN: 17 plant structures; EXPRESSED DURING: 7 growth stages; CONTAINS InterPro DOMAIN/s: Bicarbonate transporter, eukaryotic (InterPro:IPR003020), Bicarbonate transporter, C-terminal (InterPro:IPR011531); BEST Arabidopsis thaliana protein match is: HCO3- transporter fam…	Bicarbonate transporter, C-terminal | Bicarbonate transporter, eukaryotic	NO
AT1G75170	0.805343	4.24069	0.00217847	0.0310114	UP	Sec14p-like phosphatidylinositol transfer family protein	Sec14p-like phosphatidylinositol transfer family protein; CONTAINS InterPro DOMAIN/s: Cellular retinaldehyde-binding/triple function, C-terminal (InterPro:IPR001251); CONTAINS InterPro DOMAIN/s: Cellular retinaldehyde-binding/triple function, C-terminal (InterPro:IPR001251), Cellular retinaldehyde-binding/triple function, N-terminal (InterPro:IPR008273), Phosphatidylinositol transfer protein-like…	CRAL-TRIO domain | CRAL/TRIO, N-terminal domain	NO
AT1G75360	-1.40862	0.449037	0.00165362	0.0246621	DOWN		unknown protein		NO
AT1G75410	1.86451	6.7917	3.16011e-16	1.298e-13	UP	BEL1-like homeodomain 3	BEL1-like homeodomain 3 (BLH3); CONTAINS InterPro DOMAIN/s: Homeobox (InterPro:IPR001356), Homeodomain-like (InterPro:IPR009057), POX (InterPro:IPR006563), Homeodomain-related (InterPro:IPR012287); BEST Arabidopsis thaliana protein match is: BEL1-like homeodomain 10 (TAIR:AT1G19700.3)	Homeobox KN domain | Homeobox domain | Homeodomain-like | POX domain	NO
AT1G75470	7.41818	-1.05596	1.65284e-10	2.14939e-08	UP	purine permease 15	purine permease 15 (PUP15); CONTAINS InterPro DOMAIN/s: Protein of unknown function DUF250 (InterPro:IPR004853); BEST Arabidopsis thaliana protein match is: purine permease 14 (TAIR:AT1G19770.1)		NO
AT1G75730	1.26002	5.50285	1.4813e-06	7.16833e-05	UP		unknown protein; FUNCTIONS IN: molecular_function unknown; INVOLVED IN: biological_process unknown; EXPRESSED IN: 22 plant structures; EXPRESSED DURING: 12 growth stages		NO
AT1G75860	1.00502	5.53612	3.91198e-05	0.00115074	UP		unknown protein; BEST Arabidopsis thaliana protein match is: unknown protein (TAIR:AT1G20100.1)		NO
AT1G75945	-0.98247	3.23825	0.00285571	0.0388305	DOWN				NO
AT1G76050	-0.671054	4.86533	0.00348186	0.0452965	DOWN	Pseudouridine synthase family protein	Pseudouridine synthase family protein; FUNCTIONS IN: pseudouridine synthase activity; INVOLVED IN: pseudouridine synthesis, RNA modification; LOCATED IN: chloroplast; EXPRESSED IN: shoot, leaf lamina base, stem, embryo, leaf whorl; EXPRESSED DURING: D bilateral stage; CONTAINS InterPro DOMAIN/s: Pseudouridine synthase, RluC/RluD (InterPro:IPR006225), Pseudouridine synthase, catalytic domain (Inte…	Pseudouridine synthase, RluC/RluD | Pseudouridine synthase, RluC/RluD, conserved site | Pseudouridine synthase, RsuA/RluB/C/D/E/F | Pseudouridine synthase, catalytic domain | RNA-binding S4 domain	NO
AT1G76130	0.842251	4.12692	0.00179386	0.0262692	UP	alpha-amylase-like 2	alpha-amylase-like 2 (AMY2); FUNCTIONS IN: cation binding, catalytic activity, alpha-amylase activity, calcium ion binding; INVOLVED IN: carbohydrate metabolic process, glycogen catabolic process; LOCATED IN: extracellular region; EXPRESSED IN: 25 plant structures; EXPRESSED DURING: 13 growth stages; CONTAINS InterPro DOMAIN/s: Glycoside hydrolase family 13 (InterPro:IPR006046), Alpha-amylase, pl…	Alpha amylase | Alpha-amylase, C-terminal beta-sheet | Alpha-amylase, plant | Glycoside hydrolase, catalytic domain | Glycoside hydrolase, family 13 | Glycoside hydrolase, superfamily | Glycosyl hydrolase, family 13, all-beta | Glycosyl hydrolase, family 13, catalytic domain	NO
AT1G76135	2.37219	0.497084	3.25739e-07	1.9147e-05	UP	MIR394B; miRNA			NO
AT1G76180	0.884444	9.65147	0.000383908	0.00758382	UP	Dehydrin family protein	EARLY RESPONSE TO DEHYDRATION 14 (ERD14); CONTAINS InterPro DOMAIN/s: Dehydrin (InterPro:IPR000167); FUNCTIONS IN: calcium ion binding; BEST Arabidopsis thaliana protein match is: Dehydrin family protein (TAIR:AT1G20450.2); INVOLVED IN: in 6 processes; LOCATED IN: plasma membrane, chloroplast; EXPRESSED IN: 26 plant structures; EXPRESSED DURING: 15 growth stages	Dehydrin	NO
AT1G76220	2.89387	-0.46007	1.17817e-06	5.8528e-05	UP	Arabidopsis protein of unknown function (DUF241)	Arabidopsis protein of unknown function (DUF241); FUNCTIONS IN: molecular_function unknown; INVOLVED IN: biological_process unknown; LOCATED IN: chloroplast; EXPRESSED IN: root, carpel; EXPRESSED DURING: 4 anthesis; CONTAINS InterPro DOMAIN/s: Protein of unknown function DUF241, plant (InterPro:IPR004320); BEST Arabidopsis thaliana protein match is: Arabidopsis protein of unknown function (DUF241…	Protein of unknown function DUF241, plant	NO
AT1G76240	1.93757	2.49931	5.42699e-08	3.87259e-06	UP	Arabidopsis protein of unknown function (DUF241)	Arabidopsis protein of unknown function (DUF241); FUNCTIONS IN: molecular_function unknown; LOCATED IN: chloroplast; EXPRESSED IN: 19 plant structures; EXPRESSED DURING: 9 growth stages; CONTAINS InterPro DOMAIN/s: Protein of unknown function DUF241, plant (InterPro:IPR004320); BEST Arabidopsis thaliana protein match is: Arabidopsis protein of unknown function (DUF241) (TAIR:AT2G17080.1)	Protein of unknown function DUF241, plant	NO
AT1G76350	0.877559	4.54799	0.000148894	0.00347773	UP	Plant regulator RWP-RK family protein	Plant regulator RWP-RK family protein; CONTAINS InterPro DOMAIN/s: Octicosapeptide/Phox/Bem1p (InterPro:IPR000270), Plant regulator RWP-RK (InterPro:IPR003035); BEST Arabidopsis thaliana protein match is: Plant regulator RWP-RK family protein (TAIR:AT1G20640.2)	Phox/Bem1p | RWP-RK domain	NO
AT1G76420	1.58373	-0.515899	0.00207392	0.0297241	UP	NAC (No Apical Meristem) domain transcriptional regulator superfamily protein	CUP SHAPED COTYLEDON3 (CUC3); CONTAINS InterPro DOMAIN/s: No apical meristem (NAM) protein (InterPro:IPR003441); BEST Arabidopsis thaliana protein match is: NAC domain containing protein 38 (TAIR:AT2G24430.2)	NAC domain	NO
AT1G76500	1.11295	2.53547	0.00339098	0.0443713	UP	Predicted AT-hook DNA-binding family protein	SUPPRESSOR OF PHYB-4#3 (SOB3); FUNCTIONS IN: DNA binding; INVOLVED IN: photomorphogenesis; LOCATED IN: cellular_component unknown; EXPRESSED IN: 10 plant structures; EXPRESSED DURING: 6 growth stages; CONTAINS InterPro DOMAIN/s: Protein of unknown function DUF296 (InterPro:IPR005175), AT hook, DNA-binding motif (InterPro:IPR017956), Predicted AT-hook DNA-binding (InterPro:IPR014476); BEST Arabido…	AT hook, DNA-binding motif | Domain of unknown function DUF296 | Predicted AT-hook DNA-binding	NO
AT1G76590	-1.69066	4.81195	1.03047e-05	0.000376436	DOWN	PLATZ transcription factor family protein	PLATZ transcription factor family protein; CONTAINS InterPro DOMAIN/s: Protein of unknown function DUF597 (InterPro:IPR006734); BEST Arabidopsis thaliana protein match is: PLATZ transcription factor family protein (TAIR:AT1G21000.1)	Protein of unknown function DUF597	NO
AT1G76720	0.686514	4.47664	0.00373047	0.0477258	UP	eukaryotic translation initiation factor 2 (eIF-2) family protein	eukaryotic translation initiation factor 2 (eIF-2) family protein; FUNCTIONS IN: GTP binding, GTPase activity, translation initiation factor activity; INVOLVED IN: translational initiation; LOCATED IN: cellular_component unknown; EXPRESSED IN: guard cell, cultured cell; CONTAINS InterPro DOMAIN/s: Small GTP-binding protein (InterPro:IPR005225), Translation elongation factor EFTu/EF1A, domain 2 (I…	Elongation factor Tu-type domain | Elongation factor, GTP-binding domain | P-loop containing nucleoside triphosphate hydrolase | Small GTP-binding protein domain | Translation elongation factor EFTu/EF1A, domain 2 | Translation initiation factor IF- 2, domain 3 | Translation protein, beta-barrel domain	YES	1:28794866:C-CT;exonic_variant,1:28794866:C-CT;exonic_variant&protein_coding
AT1G76970	1.68333	4.13742	2.56774e-11	4.00389e-09	UP	Target of Myb protein 1	Target of Myb protein 1; FUNCTIONS IN: protein transporter activity; INVOLVED IN: intracellular protein transport, intra-Golgi vesicle-mediated transport; LOCATED IN: Golgi stack, intracellular; EXPRESSED IN: 21 plant structures; EXPRESSED DURING: 13 growth stages; CONTAINS InterPro DOMAIN/s: VHS (InterPro:IPR002014), Target of Myb protein 1 (InterPro:IPR014645), GAT (InterPro:IPR004152), VHS sub…	ENTH/VHS | GAT | Target of Myb protein 1 | VHS | VHS subgroup	NO
AT1G77080	-1.66446	5.07016	1.16464e-12	2.37735e-10	DOWN	K-box region and MADS-box transcription factor family protein	K-box region and MADS-box transcription factor family protein ; MADS AFFECTING FLOWERING 1 (MAF1); FUNCTIONS IN: sequence-specific DNA binding transcription factor activity; INVOLVED IN: photoperiodism, flowering, negative regulation of flower development, regulation of transcription, DNA-dependent, regulation of flower development; LOCATED IN: nucleus; EXPRESSED IN: 24 plant structures; EXPRESSE…	Transcription factor, K-box | Transcription factor, MADS-box	NO
AT1G77122	-1.03832	4.39384	3.70812e-05	0.00110257	DOWN	Uncharacterised protein family UPF0090	Uncharacterised protein family UPF0090; CONTAINS InterPro DOMAIN/s: Uncharacterised protein family UPF0090 (InterPro:IPR003728); BEST Arabidopsis thaliana protein match is: Uncharacterised protein family UPF0090 (TAIR:AT1G69210.1)	Ribosome maturation factor RimP | Ribosome maturation factor RimP, N-terminal	NO
AT1G77210	-1.11486	5.57084	0.00091951	0.0153967	DOWN	sugar transporter 14	sugar transport protein 14 (STP14); FUNCTIONS IN: galactose transmembrane transporter activity, carbohydrate transmembrane transporter activity, sugar:hydrogen symporter activity; INVOLVED IN: transport, transmembrane transport; LOCATED IN: plasma membrane, membrane; EXPRESSED IN: 20 plant structures; EXPRESSED DURING: 10 growth stages; CONTAINS InterPro DOMAIN/s: Sugar transporter, conserved sit…	General substrate transporter | Major facilitator superfamily domain | Major facilitator superfamily domain, general substrate transporter | Sugar transporter, conserved site | Sugar/inositol transporter	NO
AT1G77290	1.09025	4.1149	2.26658e-05	0.000735458	UP	Glutathione S-transferase family protein	Glutathione S-transferase family protein; INVOLVED IN: pentachlorophenol catabolic process; LOCATED IN: plasma membrane; CONTAINS InterPro DOMAIN/s: Thioredoxin fold (InterPro:IPR012335), Glutathione S-transferase, C-terminal (InterPro:IPR004046), Glutathione S-transferase, C-terminal-like (InterPro:IPR010987), Glutathione S-transferase/chloride channel, C-terminal (InterPro:IPR017933), Glutathio…	Glutathione S-transferase, C-terminal-like | Glutathione S-transferase, N-terminal | Thioredoxin-like fold	NO
AT1G77330	1.51113	5.76956	2.08462e-05	0.000684996	UP	2-oxoglutarate (2OG) and Fe(II)-dependent oxygenase superfamily protein	2-oxoglutarate (2OG) and Fe(II)-dependent oxygenase superfamily protein; CONTAINS InterPro DOMAIN/s: Oxoglutarate/iron-dependent oxygenase (InterPro:IPR005123); BEST Arabidopsis thaliana protein match is: ACC oxidase 2 (TAIR:AT1G62380.1)	Isopenicillin N synthase-like | Non-haem dioxygenase N-terminal domain | Oxoglutarate/iron-dependent dioxygenase	NO
AT1G77580	0.731783	5.2917	0.000774916	0.0134052	UP	Plant protein of unknown function (DUF869)	Plant protein of unknown function (DUF869); CONTAINS InterPro DOMAIN/s: Protein of unknown function DUF869, plant (InterPro:IPR008587); BEST Arabidopsis thaliana protein match is: Plant protein of unknown function (DUF869) (TAIR:AT1G21810.1)	Filament-like plant protein	NO
AT1G77920	1.00379	5.25404	0.000366293	0.00730439	UP	bZIP transcription factor family protein	bZIP transcription factor family protein; CONTAINS InterPro DOMAIN/s: Basic-leucine zipper (bZIP) transcription factor (InterPro:IPR004827), bZIP transcription factor, bZIP-1 (InterPro:IPR011616); BEST Arabidopsis thaliana protein match is: TGA1A-related gene 3 (TAIR:AT1G22070.1)	Basic-leucine zipper domain | Transcription factor TGA like domain	YES	1:29300903:T-TTA;exonic_variant,1:29300884:TA-T;exonic_variant,1:29300847:C-A;exonic_variant,1:29300853:A-G;exonic_variant,1:29300922:T-C;exonic_variant,1:29300905:ATG-A;exonic_variant,1:29300940:A-AG;exonic_variant,1:29300896:A-C;exonic_variant,1:29300880:T-A;exonic_variant,1:29300932:C-T;exonic_variant
AT1G78090	1.05645	2.32388	0.00177166	0.0259779	UP	trehalose-6-phosphate phosphatase	trehalose-6-phosphate phosphatase (TPPB); CONTAINS InterPro DOMAIN/s: HAD-superfamily hydrolase, subfamily IIB (InterPro:IPR006379), Trehalose-phosphatase (InterPro:IPR003337); BEST Arabidopsis thaliana protein match is: Haloacid dehalogenase-like hydrolase (HAD) superfamily protein (TAIR:AT1G22210.1)	HAD-like domain | HAD-superfamily hydrolase, subfamily IIB | Trehalose-phosphatase	NO
AT1G78130	-1.14946	3.52921	5.70055e-05	0.00157377	DOWN	Major facilitator superfamily protein	unfertilized embryo sac 2 (UNE2); CONTAINS InterPro DOMAIN/s: Major facilitator superfamily (InterPro:IPR020846), Major facilitator superfamily MFS-1 (InterPro:IPR011701), Major facilitator superfamily, general substrate transporter (InterPro:IPR016196); BEST Arabidopsis thaliana protein match is: Major facilitator superfamily protein (TAIR:AT5G10190.1)	Major facilitator superfamily | Major facilitator superfamily domain | Major facilitator superfamily domain, general substrate transporter	NO
AT1G78150	0.775725	6.89676	0.000704173	0.0123785	UP		unknown protein; FUNCTIONS IN: molecular_function unknown; INVOLVED IN: biological_process unknown; EXPRESSED IN: 23 plant structures; EXPRESSED DURING: 13 growth stages; BEST Arabidopsis thaliana protein match is: unknown protein (TAIR:AT1G35780.1)	Domain of unknown function DUF4057	NO
AT1G78210	1.69125	5.25076	6.3412e-14	1.82545e-11	UP	alpha/beta-Hydrolases superfamily protein	alpha/beta-Hydrolases superfamily protein; FUNCTIONS IN: hydrolase activity, catalytic activity; INVOLVED IN: biological_process unknown; LOCATED IN: cellular_component unknown; EXPRESSED IN: 22 plant structures; EXPRESSED DURING: 13 growth stages; CONTAINS InterPro DOMAIN/s: Epoxide hydrolase-like (InterPro:IPR000639), Alpha/beta hydrolase fold-1 (InterPro:IPR000073); BEST Arabidopsis thaliana p…	Alpha/Beta hydrolase fold | Alpha/beta hydrolase fold-1 | Epoxide hydrolase-like	NO
AT1G78240	1.89928	7.66811	8.01819e-13	1.73116e-10	UP	S-adenosyl-L-methionine-dependent methyltransferases superfamily protein	TUMOROUS SHOOT DEVELOPMENT 2 (TSD2); FUNCTIONS IN: methyltransferase activity; INVOLVED IN: shoot development, homogalacturonan biosynthetic process, response to cytokinin stimulus, root development; LOCATED IN: Golgi apparatus; EXPRESSED IN: 31 plant structures; EXPRESSED IN: 32 plant structures; EXPRESSED DURING: 13 growth stages; CONTAINS InterPro DOMAIN/s: Protein of unknown function DUF248, …	Putative S-adenosyl-L-methionine-dependent methyltransferase | S-adenosyl-L-methionine-dependent methyltransferase-like	NO
AT1G78270	-1.23819	3.68648	0.000913068	0.0153153	DOWN	UDP-glucosyl transferase 85A4	UDP-glucosyl transferase 85A4 (UGT85A4); FUNCTIONS IN: transferase activity, transferring hexosyl groups, UDP-glycosyltransferase activity, glucuronosyltransferase activity; INVOLVED IN: metabolic process; LOCATED IN: cellular_component unknown; EXPRESSED IN: 17 plant structures; EXPRESSED DURING: 9 growth stages; CONTAINS InterPro DOMAIN/s: UDP-glucuronosyl/UDP-glucosyltransferase (InterPro:IPR0…	UDP-glucuronosyl/UDP-glucosyltransferase	NO
AT1G78290	1.84155	4.64951	2.21466e-09	2.21341e-07	UP	Protein kinase superfamily protein	Protein kinase superfamily protein; FUNCTIONS IN: protein serine/threonine kinase activity, protein kinase activity, kinase activity, ATP binding; INVOLVED IN: response to karrikin; LOCATED IN: nucleus, cytoplasm; EXPRESSED IN: 22 plant structures; EXPRESSED DURING: 12 growth stages; CONTAINS InterPro DOMAIN/s: Protein kinase, ATP binding site (InterPro:IPR017441), Serine/threonine-protein kinase…	Protein kinase domain | Protein kinase, ATP binding site | Protein kinase-like domain | Serine/threonine-protein kinase, active site | Serine/threonine/dual specificity protein kinase, catalytic domain	NO
AT1G78340	1.58946	3.02926	6.11175e-07	3.32016e-05	UP	glutathione S-transferase TAU 22	glutathione S-transferase TAU 22 (GSTU22); CONTAINS InterPro DOMAIN/s: Thioredoxin fold (InterPro:IPR012335), Glutathione S-transferase, C-terminal (InterPro:IPR004046), Glutathione S-transferase, C-terminal-like (InterPro:IPR010987), Glutathione S-transferase/chloride channel, C-terminal (InterPro:IPR017933), Glutathione S-transferase, N-terminal (InterPro:IPR004045), Thioredoxin-like fold (Inte…	Glutathione S-transferase, C-terminal | Glutathione S-transferase, C-terminal-like | Glutathione S-transferase, N-terminal | Thioredoxin-like fold	NO
AT1G78410	-2.04463	-1.23396	0.00107938	0.0175711	DOWN	VQ motif-containing protein	VQ motif-containing protein; CONTAINS InterPro DOMAIN/s: VQ (InterPro:IPR008889); BEST Arabidopsis thaliana protein match is: VQ motif-containing protein (TAIR:AT1G17147.1)	VQ	NO
AT1G78520	2.47776	-1.99955	0.0039141	0.0495418	UP	Carbohydrate-binding X8 domain superfamily protein	Carbohydrate-binding X8 domain superfamily protein; FUNCTIONS IN: molecular_function unknown; INVOLVED IN: biological_process unknown; LOCATED IN: endomembrane system; CONTAINS InterPro DOMAIN/s: X8 (InterPro:IPR012946); BEST Arabidopsis thaliana protein match is: Carbohydrate-binding X8 domain superfamily protein (TAIR:AT2G43670.1)	X8	NO
AT1G78720	2.01086	0.0706114	8.99658e-05	0.0022869	UP	SecY protein transport family protein	SecY protein transport family protein; FUNCTIONS IN: P-P-bond-hydrolysis-driven protein transmembrane transporter activity; INVOLVED IN: protein secretion, protein transport; LOCATED IN: membrane; EXPRESSED IN: 6 plant structures; EXPRESSED DURING: LP.10 ten leaves visible, LP.02 two leaves visible, petal differentiation and expansion stage, LP.08 eight leaves visible; CONTAINS InterPro DOMAIN/s:…	SecY subunit domain | SecY/SEC61-alpha family | Translocon Sec61/SecY, plug domain	NO
AT1G78830	-0.802893	6.62597	0.00183371	0.0267597	DOWN	Curculin-like (mannose-binding) lectin family protein	Curculin-like (mannose-binding) lectin family protein; FUNCTIONS IN: sugar binding; LOCATED IN: apoplast, cell wall, plasma membrane, plant-type cell wall; EXPRESSED IN: leaf; CONTAINS InterPro DOMAIN/s: Curculin-like (mannose-binding) lectin (InterPro:IPR001480), PAN-2 domain (InterPro:IPR013227); BEST Arabidopsis thaliana protein match is: D-mannose binding lectin protein with Apple-like carboh…	Bulb-type lectin domain | PAN-2 domain | S-locus glycoprotein, mannose-binding-type	NO
AT1G78950	1.60861	1.80974	6.95102e-06	0.000271656	UP	Terpenoid cyclases family protein	Terpenoid cyclases family protein; CONTAINS InterPro DOMAIN/s: Terpene synthase, conserved site (InterPro:IPR002365), Squalene cyclase (InterPro:IPR018333), Terpenoid cylases/protein prenyltransferase alpha-alpha toroid (InterPro:IPR008930), Prenyltransferase/squalene oxidase (InterPro:IPR001330); BEST Arabidopsis thaliana protein match is: camelliol C synthase 1 (TAIR:AT1G78955.1)	Prenyltransferase/squalene oxidase | Squalene cyclase | Terpene synthase, conserved site | Terpenoid cyclases/protein prenyltransferase alpha-alpha toroid	NO
AT1G78990	1.31439	1.90815	0.000517184	0.00961328	UP	HXXXD-type acyl-transferase family protein	HXXXD-type acyl-transferase family protein; FUNCTIONS IN: transferase activity, transferring acyl groups other than amino-acyl groups, transferase activity; INVOLVED IN: biological_process unknown; LOCATED IN: cellular_component unknown; EXPRESSED IN: root; CONTAINS InterPro DOMAIN/s: Transferase (InterPro:IPR003480); BEST Arabidopsis thaliana protein match is: HXXXD-type acyl-transferase family …	Chloramphenicol acetyltransferase-like domain | Transferase	NO
AT1G79250	2.72062	-1.0735	0.000567803	0.0104195	UP	AGC kinase 1.7	AGC kinase 1.7 (AGC1.7); CONTAINS InterPro DOMAIN/s: Protein kinase, catalytic domain (InterPro:IPR000719), Serine/threonine-protein kinase domain (InterPro:IPR002290), Serine/threonine-protein kinase-like domain (InterPro:IPR017442), Protein kinase-like domain (InterPro:IPR011009), Serine/threonine-protein kinase, active site (InterPro:IPR008271); BEST Arabidopsis thaliana protein match is: root…	Pleckstrin homology-like domain | Protein kinase domain | Protein kinase-like domain | Serine/threonine-protein kinase, active site | Serine/threonine/dual specificity protein kinase, catalytic domain	NO
AT1G79270	2.46601	7.09368	3.35752e-13	8.02017e-11	UP	evolutionarily conserved C-terminal region 8	evolutionarily conserved C-terminal region 8 (ECT8); CONTAINS InterPro DOMAIN/s: YTH domain (InterPro:IPR007275); BEST Arabidopsis thaliana protein match is: evolutionarily conserved C-terminal region 6 (TAIR:AT3G17330.1)	YTH domain	NO
AT1G79320	2.29661	2.31506	1.8789e-08	1.4717e-06	UP	metacaspase 6	metacaspase 6 (MC6); FUNCTIONS IN: cysteine-type endopeptidase activity; INVOLVED IN: proteolysis; LOCATED IN: cellular_component unknown; EXPRESSED IN: stem, root; CONTAINS InterPro DOMAIN/s: Peptidase C14, caspase catalytic (InterPro:IPR011600); BEST Arabidopsis thaliana protein match is: metacaspase 5 (TAIR:AT1G79330.1)	Caspase-like domain | Peptidase C14, caspase domain	NO
AT1G79330	2.59879	0.770082	9.36477e-09	7.98519e-07	UP	metacaspase 5	metacaspase 5 (MC5); FUNCTIONS IN: cysteine-type endopeptidase activity; INVOLVED IN: induction of apoptosis; LOCATED IN: chloroplast; EXPRESSED IN: root; CONTAINS InterPro DOMAIN/s: Peptidase C14, caspase catalytic (InterPro:IPR011600); BEST Arabidopsis thaliana protein match is: metacaspase 4 (TAIR:AT1G79340.1)	Caspase-like domain | Peptidase C14, caspase domain	NO
AT1G79450	2.39824	3.47562	2.71991e-15	9.25345e-13	UP	ALA-interacting subunit 5	ALA-interacting subunit 5 (ALIS5); INVOLVED IN: biological_process unknown; LOCATED IN: chloroplast thylakoid lumen, plasma membrane, membrane; EXPRESSED IN: 12 plant structures; EXPRESSED DURING: L mature pollen stage, M germinated pollen stage, 4 anthesis, petal differentiation and expansion stage; CONTAINS InterPro DOMAIN/s: Protein of unknown function DUF284, transmembrane eukaryotic (InterPr…	CDC50/LEM3 family	NO
AT1G79529	-2.84314	0.57943	3.99123e-05	0.00116996	DOWN	other RNA			NO
AT1G79530	1.23243	5.9596	5.83964e-06	0.000233315	UP	glyceraldehyde-3-phosphate dehydrogenase of plastid 1	glyceraldehyde-3-phosphate dehydrogenase of plastid 1 (GAPCP-1); FUNCTIONS IN: glyceraldehyde-3-phosphate dehydrogenase (phosphorylating) activity, copper ion binding, glyceraldehyde-3-phosphate dehydrogenase activity, zinc ion binding; INVOLVED IN: in 6 processes; LOCATED IN: plastid, membrane; EXPRESSED IN: guard cell, leaf; CONTAINS InterPro DOMAIN/s: Glyceraldehyde 3-phosphate dehydrogenase s…	Glyceraldehyde 3-phosphate dehydrogenase, NAD(P) binding domain | Glyceraldehyde 3-phosphate dehydrogenase, active site | Glyceraldehyde 3-phosphate dehydrogenase, catalytic domain | Glyceraldehyde-3-phosphate dehydrogenase, type I | Glyceraldehyde/Erythrose phosphate dehydrogenase family | NAD(P)-binding domain	NO
AT1G79580	2.54794	1.58738	2.6028e-09	2.55583e-07	UP	NAC (No Apical Meristem) domain transcriptional regulator superfamily protein	SOMBRERO (SMB); CONTAINS InterPro DOMAIN/s: No apical meristem (NAM) protein (InterPro:IPR003441); BEST Arabidopsis thaliana protein match is: NAC domain containing protein 70 (TAIR:AT4G10350.1)	NAC domain	NO
AT1G79790	-1.2465	4.56275	7.87951e-05	0.00204618	DOWN	Haloacid dehalogenase-like hydrolase (HAD) superfamily protein	Haloacid dehalogenase-like hydrolase (HAD) superfamily protein; FUNCTIONS IN: hydrolase activity; LOCATED IN: chloroplast; EXPRESSED IN: 23 plant structures; EXPRESSED DURING: 13 growth stages; CONTAINS InterPro DOMAIN/s: HAD-superfamily hydrolase, subfamily IA, variant 3 (InterPro:IPR006402)	HAD hydrolase, subfamily IA | HAD-like domain	NO
AT1G79860	2.26884	0.558849	0.000467395	0.0088786	UP	RHO guanyl-nucleotide exchange factor 12	RHO guanyl-nucleotide exchange factor 12 (ROPGEF12); CONTAINS InterPro DOMAIN/s: Rop nucleotide exchanger, PRONE (InterPro:IPR005512); BEST Arabidopsis thaliana protein match is: RHO guanyl-nucleotide exchange factor 11 (TAIR:AT1G52240.1)	PRONE domain	NO
AT1G80240	2.38706	4.6967	1.13704e-15	4.20841e-13	UP	Protein of unknown function, DUF642	Protein of unknown function, DUF642; CONTAINS InterPro DOMAIN/s: Protein of unknown function DUF642 (InterPro:IPR006946); BEST Arabidopsis thaliana protein match is: Protein of unknown function, DUF642 (TAIR:AT5G25460.1)	Galactose-binding domain-like | Protein of unknown function DUF642	NO
AT1G80310	-1.04454	5.1189	3.44667e-06	0.000148449	DOWN	sulfate transmembrane transporters	sulfate transmembrane transporters; FUNCTIONS IN: sulfate transmembrane transporter activity; INVOLVED IN: response to salt stress; LOCATED IN: vacuole; EXPRESSED IN: 19 plant structures; EXPRESSED DURING: 10 growth stages; CONTAINS InterPro DOMAIN/s: Sulphate transporter (InterPro:IPR011547); BEST Arabidopsis thaliana protein match is: molybdate transporter 1 (TAIR:AT2G25680.1)	Sulphate transporter	NO
AT1G80730	1.61178	-0.275533	0.00138677	0.0213766	UP	zinc-finger protein 1	zinc-finger protein 1 (ZFP1); FUNCTIONS IN: sequence-specific DNA binding transcription factor activity, zinc ion binding, nucleic acid binding; INVOLVED IN: photomorphogenesis; LOCATED IN: intracellular; EXPRESSED IN: inflorescence meristem, petal, flower; EXPRESSED DURING: 4 anthesis, petal differentiation and expansion stage; CONTAINS InterPro DOMAIN/s: Zinc finger, C2H2-type (InterPro:IPR0070…	Zinc finger, C2H2 | Zinc finger, C2H2-like	NO
AT1G80900	1.27616	3.58015	1.40004e-05	0.000489156	UP	magnesium transporter 1	magnesium transporter 1 (MGT1); FUNCTIONS IN: magnesium ion transmembrane transporter activity, metal ion transmembrane transporter activity; INVOLVED IN: transmembrane transport, metal ion transport; LOCATED IN: membrane; EXPRESSED IN: 29 plant structures; EXPRESSED DURING: 13 growth stages; CONTAINS InterPro DOMAIN/s: Mg2+ transporter protein, CorA-like (InterPro:IPR002523); BEST Arabidopsis th…	Magnesium transporter MRS2/LPE10 | Mg2+ transporter protein, CorA-like/Zinc transport protein ZntB	NO
AT2G01275	2.71498	0.695916	7.64237e-10	8.58009e-08	UP	RING/FYVE/PHD zinc finger superfamily protein	RING/FYVE/PHD zinc finger superfamily protein; FUNCTIONS IN: zinc ion binding; CONTAINS InterPro DOMAIN/s: Protein of unknown function DUF3675 (InterPro:IPR022143), Zinc finger, C3HC4 RING-type (InterPro:IPR018957), Zinc finger, RING-CH-type (InterPro:IPR011016); BEST Arabidopsis thaliana protein match is: RING/FYVE/PHD zinc finger superfamily protein (TAIR:AT5G38070.1)	Protein of unknown function DUF3675 | Zinc finger, RING-CH-type | Zinc finger, RING/FYVE/PHD-type	NO
AT2G01520	-2.00251	6.48383	5.56993e-05	0.00154277	DOWN	MLP-like protein 328	MLP-like protein 328 (MLP328); FUNCTIONS IN: copper ion binding; INVOLVED IN: response to zinc ion; LOCATED IN: cellular_component unknown; EXPRESSED IN: 13 plant structures; EXPRESSED DURING: 7 growth stages; CONTAINS InterPro DOMAIN/s: Bet v I allergen (InterPro:IPR000916); BEST Arabidopsis thaliana protein match is: Polyketide cyclase/dehydrase and lipid transport superfamily protein (TAIR:AT4…	Bet v I domain | Major latex protein domain | START-like domain	NO
AT2G01620	-0.906707	4.63273	7.17215e-05	0.00188575	DOWN	RNI-like superfamily protein	maternal effect embryo arrest 11 (MEE11); BEST Arabidopsis thaliana protein match is: Ribonuclease inhibitor (TAIR:AT3G26000.1)		NO
AT2G01755	-1.17958	3.22914	0.0011606	0.0185839	DOWN		unknown protein; FUNCTIONS IN: molecular_function unknown; INVOLVED IN: biological_process unknown; LOCATED IN: chloroplast		NO
AT2G01830	1.42612	5.86728	4.29399e-08	3.13722e-06	UP	CHASE domain containing histidine kinase protein	WOODEN LEG (WOL); FUNCTIONS IN: osmosensor activity, cytokine binding, cytokinin receptor activity, protein histidine kinase activity, phosphoprotein phosphatase activity; INVOLVED IN: in 7 processes; LOCATED IN: membrane; EXPRESSED IN: 30 plant structures; EXPRESSED DURING: 13 growth stages; CONTAINS InterPro DOMAIN/s: Signal transduction histidine kinase, homodimeric (InterPro:IPR009082), CHASE…	CHASE | CheY-like superfamily | Histidine kinase-like ATPase, C-terminal domain | Signal transduction histidine kinase EnvZ-like, dimerisation/phosphoacceptor domain | Signal transduction histidine kinase, core | Signal transduction histidine kinase, homodimeric domain | Signal transduction histidine kinase-related protein, C-terminal | Signal transduction response regulator, receiver domain	NO
AT2G01860	1.7692	4.76401	6.49897e-14	1.85502e-11	UP	Tetratricopeptide repeat (TPR)-like superfamily protein	EMBRYO DEFECTIVE 975 (EMB975); FUNCTIONS IN: molecular_function unknown; INVOLVED IN: biological_process unknown; LOCATED IN: chloroplast; EXPRESSED IN: 22 plant structures; EXPRESSED DURING: 13 growth stages; CONTAINS InterPro DOMAIN/s: Pentatricopeptide repeat (InterPro:IPR002885); BEST Arabidopsis thaliana protein match is: LATERAL ORGAN JUNCTION (TAIR:AT2G39230.1)	Pentatricopeptide repeat	NO
AT2G01880	1.58321	2.28787	3.08542e-05	0.000942159	UP	purple acid phosphatase 7	purple acid phosphatase 7 (PAP7); FUNCTIONS IN: protein serine/threonine phosphatase activity, acid phosphatase activity; LOCATED IN: endomembrane system; EXPRESSED IN: 7 plant structures; CONTAINS InterPro DOMAIN/s: Metallophosphoesterase (InterPro:IPR004843); BEST Arabidopsis thaliana protein match is: purple acid phosphatase 17 (TAIR:AT3G17790.1)	Acid phosphatase, type 5 | Calcineurin-like phosphoesterase domain, apaH type | Metallo-dependent phosphatase-like	NO
AT2G01890	2.04654	6.30755	8.81759e-11	1.24262e-08	UP	purple acid phosphatase 8	purple acid phosphatase 8 (PAP8); FUNCTIONS IN: protein serine/threonine phosphatase activity, acid phosphatase activity; INVOLVED IN: dephosphorylation; LOCATED IN: endomembrane system; EXPRESSED IN: 22 plant structures; EXPRESSED DURING: 12 growth stages; CONTAINS InterPro DOMAIN/s: Metallophosphoesterase (InterPro:IPR004843); BEST Arabidopsis thaliana protein match is: purple acid phosphatase …	Acid phosphatase, type 5 | Calcineurin-like phosphoesterase domain, apaH type | Metallo-dependent phosphatase-like	NO
AT2G02080	1.16853	6.71778	1.08645e-06	5.47793e-05	UP	indeterminate(ID)-domain 4	indeterminate(ID)-domain 4 (IDD4); FUNCTIONS IN: sequence-specific DNA binding transcription factor activity; LOCATED IN: intracellular; LOCATED IN: intracellular, chloroplast; EXPRESSED IN: 20 plant structures; EXPRESSED DURING: 13 growth stages; CONTAINS InterPro DOMAIN/s: Zinc finger, C2H2-like (InterPro:IPR015880), Zinc finger, C2H2-type (InterPro:IPR007087), Zinc finger, double-stranded RNA …	Zinc finger C2H2-type/integrase DNA-binding domain | Zinc finger, C2H2 | Zinc finger, C2H2-like	NO
AT2G02130	1.50261	6.22026	1.37368e-10	1.85068e-08	UP	low-molecular-weight cysteine-rich 68	low-molecular-weight cysteine-rich 68 (LCR68); FUNCTIONS IN: peptidase inhibitor activity; INVOLVED IN: defense response; LOCATED IN: endomembrane system; EXPRESSED IN: 22 plant structures; EXPRESSED DURING: 13 growth stages; CONTAINS InterPro DOMAIN/s: Gamma thionin (InterPro:IPR008176), Knottin (InterPro:IPR003614), Gamma Purothionin (InterPro:IPR008177); BEST Arabidopsis thaliana protein match…	Gamma Purothionin | Gamma thionin | Knottin, scorpion toxin-like	YES	2:540101:G-GCTCTTCTCTTGTTCATGGTATTCATTGCCACA;splice_donor_region_variant&exonic_variant&protein_coding
AT2G02148	0.985869	3.96585	0.000140422	0.00331434	UP		unknown protein	Zinc finger C2HC domain-containing protein	NO
AT2G02170	0.800713	5.31159	0.000309591	0.00635425	UP	Remorin family protein	Remorin family protein; FUNCTIONS IN: DNA binding; INVOLVED IN: biological_process unknown; LOCATED IN: plasma membrane; EXPRESSED IN: 22 plant structures; EXPRESSED DURING: 13 growth stages; CONTAINS InterPro DOMAIN/s: Remorin, C-terminal (InterPro:IPR005516); BEST Arabidopsis thaliana protein match is: Remorin family protein (TAIR:AT1G30320.1)	Remorin, C-terminal	NO
AT2G02300	2.04594	-0.906528	0.000708321	0.012432	UP	phloem protein 2-B5	phloem protein 2-B5 (PP2-B5); FUNCTIONS IN: carbohydrate binding; INVOLVED IN: N-terminal protein myristoylation; LOCATED IN: cellular_component unknown; EXPRESSED IN: carpel; EXPRESSED DURING: 4 anthesis; CONTAINS InterPro DOMAIN/s: F-box domain, Skp2-like (InterPro:IPR022364); BEST Arabidopsis thaliana protein match is: phloem protein 2-B6 (TAIR:AT2G02310.1)	F-box domain | Phloem protein 2-like	NO
AT2G02370	0.879965	4.28563	0.000342163	0.00690987	UP	SNARE associated Golgi protein family	SNARE associated Golgi protein family; FUNCTIONS IN: molecular_function unknown; INVOLVED IN: biological_process unknown; LOCATED IN: cellular_component unknown; EXPRESSED IN: 22 plant structures; EXPRESSED DURING: 13 growth stages; CONTAINS InterPro DOMAIN/s: SNARE associated Golgi protein (InterPro:IPR015414); BEST Arabidopsis thaliana protein match is: SNARE associated Golgi protein family (TA…	SNARE associated Golgi protein	NO
AT2G02455	1.70624	0.897098	4.01299e-05	0.0011743	UP				NO
AT2G02790	0.904378	5.17704	8.12025e-05	0.00209419	UP	IQ-domain 29	IQ-domain 29 (IQD29); FUNCTIONS IN: calmodulin binding; INVOLVED IN: biological_process unknown; LOCATED IN: plasma membrane; CONTAINS InterPro DOMAIN/s: IQ calmodulin-binding region (InterPro:IPR000048); BEST Arabidopsis thaliana protein match is: IQ-domain 28 (TAIR:AT1G14380.2)	Domain of unknown function DUF4005 | IQ motif, EF-hand binding site	NO
AT2G02910	0.922496	4.66068	6.25101e-05	0.00169244	UP	Protein of unknown function (DUF616)	Protein of unknown function (DUF616); CONTAINS InterPro DOMAIN/s: Protein of unknown function DUF616 (InterPro:IPR006852); BEST Arabidopsis thaliana protein match is: Protein of unknown function (DUF616) (TAIR:AT1G34550.1)	Protein of unknown function DUF616	NO
AT2G02950	-0.77517	4.63403	0.000916782	0.0153623	DOWN	phytochrome kinase substrate 1	phytochrome kinase substrate 1 (PKS1); BEST Arabidopsis thaliana protein match is: phytochrome kinase substrate 2 (TAIR:AT1G14280.1)		NO
AT2G03200	1.50678	2.50868	0.00010594	0.00262365	UP	Eukaryotic aspartyl protease family protein	Eukaryotic aspartyl protease family protein; FUNCTIONS IN: aspartic-type endopeptidase activity; INVOLVED IN: proteolysis; LOCATED IN: endomembrane system; EXPRESSED IN: 10 plant structures; EXPRESSED DURING: 4 anthesis, C globular stage, petal differentiation and expansion stage; CONTAINS InterPro DOMAIN/s: Peptidase aspartic (InterPro:IPR021109), Peptidase aspartic, catalytic (InterPro:IPR00900…	Aspartic peptidase | Aspartic peptidase domain	NO
AT2G03360	2.06468	1.10043	2.91619e-07	1.74149e-05	UP	Glycosyltransferase family 61 protein	Glycosyltransferase family 61 protein; FUNCTIONS IN: transferase activity, transferring glycosyl groups; INVOLVED IN: biological_process unknown; LOCATED IN: endomembrane system; CONTAINS InterPro DOMAIN/s: Glycosyltransferase AER61, uncharacterised (InterPro:IPR007657); BEST Arabidopsis thaliana protein match is: Glycosyltransferase family 61 protein (TAIR:AT2G03370.1)	Glycosyltransferase AER61, uncharacterised	NO
AT2G03480	0.789798	4.62019	0.00231109	0.0325281	UP	QUASIMODO2 LIKE 2	QUASIMODO2 LIKE 2 (QUL2); LOCATED IN: mitochondrion; EXPRESSED IN: male gametophyte, pollen tube; EXPRESSED DURING: L mature pollen stage, M germinated pollen stage; CONTAINS InterPro DOMAIN/s: Protein of unknown function DUF248, methyltransferase putative (InterPro:IPR004159); BEST Arabidopsis thaliana protein match is: QUASIMODO2 LIKE 1 (TAIR:AT1G13860.3)	Putative S-adenosyl-L-methionine-dependent methyltransferase | S-adenosyl-L-methionine-dependent methyltransferase-like	NO
AT2G03710	-1.4343	3.03524	3.93548e-06	0.000165482	DOWN	K-box region and MADS-box transcription factor family protein	SEPALLATA 4 (SEP4); FUNCTIONS IN: DNA binding, sequence-specific DNA binding transcription factor activity; INVOLVED IN: in 6 processes; LOCATED IN: nucleus; EXPRESSED IN: 18 plant structures; EXPRESSED DURING: 13 growth stages; CONTAINS InterPro DOMAIN/s: Transcription factor, MADS-box (InterPro:IPR002100), Transcription factor, K-box (InterPro:IPR002487); BEST Arabidopsis thaliana protein match…	Transcription factor, K-box | Transcription factor, MADS-box	NO
AT2G03720	2.00355	1.30732	0.000548928	0.0101307	UP	Adenine nucleotide alpha hydrolases-like superfamily protein	morphogenesis of root hair 6 (MRH6); CONTAINS InterPro DOMAIN/s: UspA (InterPro:IPR006016), Rossmann-like alpha/beta/alpha sandwich fold (InterPro:IPR014729); BEST Arabidopsis thaliana protein match is: Adenine nucleotide alpha hydrolases-like superfamily protein (TAIR:AT1G69080.1)		NO
AT2G03750	-2.11929	4.40756	1.71663e-17	9.6363e-15	DOWN	P-loop containing nucleoside triphosphate hydrolases superfamily protein	P-loop containing nucleoside triphosphate hydrolases superfamily protein; FUNCTIONS IN: sulfotransferase activity; INVOLVED IN: biological_process unknown; LOCATED IN: endomembrane system; EXPRESSED IN: 20 plant structures; EXPRESSED DURING: 13 growth stages; CONTAINS InterPro DOMAIN/s: Sulfotransferase domain (InterPro:IPR000863); BEST Arabidopsis thaliana protein match is: P-loop containing nuc…	P-loop containing nucleoside triphosphate hydrolase | Sulfotransferase domain	NO
AT2G04378	-1.09088	5.84075	2.20111e-06	0.000100048	DOWN	Beta-galactosidase related protein	Beta-galactosidase related protein; FUNCTIONS IN: hydrolase activity, hydrolyzing O-glycosyl compounds; INVOLVED IN: carbohydrate metabolic process; LOCATED IN: endomembrane system; CONTAINS InterPro DOMAIN/s: Glycoside hydrolase, family 35 (InterPro:IPR001944); BEST Arabidopsis thaliana protein match is: Beta-galactosidase related protein (TAIR:AT5G01080.1)		YES	2:1525334:AT-A;exonic_variant
AT2G04780	0.836471	5.35087	0.000909082	0.015256	UP	FASCICLIN-like arabinoogalactan 7	FASCICLIN-like arabinoogalactan 7 (FLA7); LOCATED IN: anchored to plasma membrane, plasma membrane, anchored to membrane, membrane; EXPRESSED IN: 22 plant structures; EXPRESSED DURING: 13 growth stages; CONTAINS InterPro DOMAIN/s: FAS1 domain (InterPro:IPR000782); BEST Arabidopsis thaliana protein match is: FASCICLIN-like arabinogalactan 6 (TAIR:AT2G20520.1)	FAS1 domain	NO
AT2G05280	2.5315	0.575008	2.43208e-08	1.8702e-06	UP	transposable element gene	non-LTR retrotransposon family (LINE), has a 9.4e-30 P-value blast match to GB:AAA67727 reverse transcriptase (LINE-element) (Mus musculus)		NO
AT2G05440	1.231	8.65868	9.81673e-08	6.54727e-06	UP	GLYCINE RICH PROTEIN 9	GLYCINE RICH PROTEIN 9 (GRP9); FUNCTIONS IN: molecular_function unknown; INVOLVED IN: biological_process unknown; LOCATED IN: endomembrane system; CONTAINS InterPro DOMAIN/s: Glycine rich protein (InterPro:IPR010800); BEST Arabidopsis thaliana protein match is: Glycine-rich protein family (TAIR:AT2G05510.1); BEST Arabidopsis thaliana protein match is: Glycine-rich protein family (TAIR:AT2G05510.2…	Glycine rich protein	NO
AT2G05510	0.967458	9.41612	0.00245715	0.0342263	UP	Glycine-rich protein family	Glycine-rich protein family; FUNCTIONS IN: molecular_function unknown; INVOLVED IN: biological_process unknown; LOCATED IN: endomembrane system; CONTAINS InterPro DOMAIN/s: Glycine rich protein (InterPro:IPR010800); BEST Arabidopsis thaliana protein match is: GLYCINE RICH PROTEIN 9 (TAIR:AT2G05440.1); BEST Arabidopsis thaliana protein match is: GLYCINE RICH PROTEIN 9 (TAIR:AT2G05440.6)	Glycine rich protein	NO
AT2G05540	-1.31495	7.35319	6.82148e-06	0.000267156	DOWN	Glycine-rich protein family	Glycine-rich protein family; LOCATED IN: endomembrane system; EXPRESSED IN: 20 plant structures; EXPRESSED DURING: 9 growth stages; CONTAINS InterPro DOMAIN/s: Glycine rich protein (InterPro:IPR010800); BEST Arabidopsis thaliana protein match is: glycine-rich protein 3 (TAIR:AT2G05520.4)	Glycine rich protein	NO
AT2G05580	4.0315	-1.66934	0.000686495	0.0121375	UP	Glycine-rich protein family	Glycine-rich protein family; LOCATED IN: endomembrane system		NO
AT2G05995	2.11706	-1.1044	0.00157098	0.0236532	UP	other RNA			NO
AT2G06255	-1.98602	1.02035	3.74901e-06	0.000158432	DOWN	ELF4-like 3	ELF4-like 3 (ELF4-L3); CONTAINS InterPro DOMAIN/s: Protein of unknown function DUF1313 (InterPro:IPR009741); BEST Arabidopsis thaliana protein match is: ELF4-like 4 (TAIR:AT1G17455.2)	Protein of unknown function DUF1313	NO
AT2G06950	-1.18135	4.88778	4.82805e-07	2.69674e-05	DOWN	transposable element gene	copia-like retrotransposon family, has a 2.7e-243 P-value blast match to dbj|BAA78426.1| polyprotein (AtRE2-1) (Arabidopsis thaliana) (Ty1_Copia-element)	GAG-pre-integrase domain | Integrase, catalytic core | Reverse transcriptase, RNA-dependent DNA polymerase | Ribonuclease H-like domain | Zinc finger, CCHC-type	NO
AT2G07042	3.84618	5.24045	5.38263e-47	4.53231e-43	UP	other RNA			YES	2:2922023:G-A;intronic_variant,2:2922023:G-A;exonic_variant
AT2G07709	-1.18844	3.12868	0.000174022	0.00394961	DOWN		pseudogene, similar to NADH dehydrogenase, blastp match of 93% identity and 1.1e-175 P-value to GP|485862|emb|CAA52952.1||X75036 NADH dehydrogenase {Triticum aestivum}		YES	2:3393322:T-G;exonic_variant
AT2G07808	-3.27278	0.720341	0.00238944	0.0334076	DOWN				YES	2:3338190:C-T;exonic_variant
AT2G10606	6.7562	1.20906	1.03488e-25	1.45232e-22	UP	MIR396A; miRNA			NO
AT2G11880	1.31415	3.65308	2.53276e-06	0.000113353	UP	transposable element gene	pseudogene, hypothetical protein		NO
AT2G11983	4.41272	-1.96205	1.62903e-05	0.000556134	UP				NO
AT2G12170	-2.65938	0.751876	6.96281e-10	7.94964e-08	DOWN		BEST Arabidopsis thaliana protein match is: Transcriptional factor B3 family protein (TAIR:AT2G24645.1)		NO
AT2G12190	-2.5412	0.778563	3.03288e-06	0.000132836	DOWN	Cytochrome P450 superfamily protein	Cytochrome P450 superfamily protein; FUNCTIONS IN: electron carrier activity, monooxygenase activity, iron ion binding, oxygen binding, heme binding; INVOLVED IN: oxidation reduction; EXPRESSED IN: stem, leaf whorl, male gametophyte, flower, stamen; EXPRESSED DURING: 4 anthesis; CONTAINS InterPro DOMAIN/s: Cytochrome P450 (InterPro:IPR001128), Cytochrome P450, conserved site (InterPro:IPR017972),…	Cytochrome P450 | Cytochrome P450, E-class, group I | Cytochrome P450, conserved site	NO
AT2G12460	-2.36834	-0.436874	6.70727e-06	0.000263911	DOWN	transposable element gene	expressed protein, similar to GB:AAC28203		NO
AT2G12646	1.51199	1.83507	0.000684262	0.0121043	UP	PLATZ transcription factor family protein	PLATZ transcription factor family protein; CONTAINS InterPro DOMAIN/s: Protein of unknown function DUF597 (InterPro:IPR006734); BEST Arabidopsis thaliana protein match is: PLATZ transcription factor family protein (TAIR:AT3G60670.1)	Protein of unknown function DUF597	NO
AT2G13370	0.665912	6.87696	0.00326519	0.0430794	UP	chromatin remodeling 5	chromatin remodeling 5 (CHR5); FUNCTIONS IN: chromatin binding, helicase activity, DNA binding, nucleic acid binding, ATP binding; INVOLVED IN: chromatin assembly or disassembly; LOCATED IN: chromatin, nucleus; EXPRESSED IN: 26 plant structures; EXPRESSED DURING: 15 growth stages; CONTAINS InterPro DOMAIN/s: Chromo domain (InterPro:IPR000953), SNF2-related (InterPro:IPR000330), Homeodomain-like (…	Chromo domain | Chromo domain-like | Chromo domain/shadow | Domain of unknown function DUF4208 | Helicase, C-terminal | Helicase, superfamily 1/2, ATP-binding domain | P-loop containing nucleoside triphosphate hydrolase | SNF2-related	NO
AT2G13540	-1.31096	4.91207	1.31535e-08	1.07269e-06	DOWN	ARM repeat superfamily protein	ABA HYPERSENSITIVE 1 (ABH1); CONTAINS InterPro DOMAIN/s: MIF4G-like, type 2 (InterPro:IPR015174), MIF4G-like, type 1 (InterPro:IPR015172), Armadillo-type fold (InterPro:IPR016024), MIF4G-like, type 3 (InterPro:IPR003890), MIF4-like, type 1/2/3 (InterPro:IPR016021)	Armadillo-type fold | MIF4-like, type 1/2/3 | MIF4G-like, type 1 | MIF4G-like, type 2 | MIF4G-like, type 3 | Nuclear cap-binding protein subunit 1	YES	2:5641899:G-A;exonic_variant,2:5641899:G-A;protein_coding;stop-gain;TGG>TGA;W>*
AT2G13650	0.868763	4.65302	0.000183713	0.00412509	UP	golgi nucleotide sugar transporter 1	golgi nucleotide sugar transporter 1 (GONST1); FUNCTIONS IN: GDP-mannose transmembrane transporter activity, nucleotide-sugar transmembrane transporter activity; INVOLVED IN: GDP-mannose transport; LOCATED IN: Golgi apparatus; EXPRESSED IN: 22 plant structures; EXPRESSED DURING: 13 growth stages; BEST Arabidopsis thaliana protein match is: golgi nucleotide sugar transporter 2 (TAIR:AT1G07290.1)		NO
AT2G13820	1.12012	3.29019	0.000615596	0.0111353	UP	Bifunctional inhibitor/lipid-transfer protein/seed storage 2S albumin superfamily protein	Bifunctional inhibitor/lipid-transfer protein/seed storage 2S albumin superfamily protein; FUNCTIONS IN: lipid binding; INVOLVED IN: lipid transport; LOCATED IN: anchored to plasma membrane, plasma membrane; EXPRESSED IN: 20 plant structures; EXPRESSED DURING: 13 growth stages; CONTAINS InterPro DOMAIN/s: Bifunctional inhibitor/plant lipid transfer protein/seed storage (InterPro:IPR016140), Plant…	Bifunctional inhibitor/plant lipid transfer protein/seed storage helical domain | Plant lipid transfer protein/Par allergen	NO
AT2G14095	1.62813	0.0266057	0.000789111	0.0135833	UP		unknown protein; FUNCTIONS IN: molecular_function unknown; INVOLVED IN: biological_process unknown; LOCATED IN: mitochondrion; EXPRESSED IN: 7 plant structures; EXPRESSED DURING: 4 anthesis, C globular stage, petal differentiation and expansion stage		NO
AT2G14560	7.85184	1.12979	7.92888e-06	0.000301754	UP	Protein of unknown function (DUF567)	LATE UPREGULATED IN RESPONSE TO HYALOPERONOSPORA PARASITICA (LURP1); CONTAINS InterPro DOMAIN/s: Protein of unknown function DUF567 (InterPro:IPR007612); BEST Arabidopsis thaliana protein match is: Protein of unknown function (DUF567) (TAIR:AT1G33840.1)		NO
AT2G14610	4.92021	1.44264	0.000355842	0.0071425	UP	pathogenesis-related gene 1	pathogenesis-related gene 1 (PR1); FUNCTIONS IN: molecular_function unknown; INVOLVED IN: response to vitamin B1, response to jasmonic acid stimulus, systemic acquired resistance, defense response; LOCATED IN: extracellular region, cell wall; EXPRESSED IN: 17 plant structures; EXPRESSED DURING: 9 growth stages; CONTAINS InterPro DOMAIN/s: Allergen V5/Tpx-1 related, conserved site (InterPro:IPR018…	Allergen V5/Tpx-1-related, conserved site | CAP domain | Cysteine-rich secretory protein, allergen V5/Tpx-1-related	NO
AT2G14680	0.837385	5.25141	0.000158818	0.0036638	UP	myosin heavy chain-related	maternal effect embryo arrest 13 (MEE13); FUNCTIONS IN: molecular_function unknown; INVOLVED IN: embryo development ending in seed dormancy; LOCATED IN: cellular_component unknown; EXPRESSED IN: 24 plant structures; EXPRESSED DURING: 15 growth stages		NO
AT2G14820	2.24861	1.37474	8.50097e-06	0.000321709	UP	Phototropic-responsive NPH3 family protein	NAKED PINS IN YUC MUTANTS 2 (NPY2); FUNCTIONS IN: signal transducer activity; INVOLVED IN: response to light stimulus; LOCATED IN: cellular_component unknown; EXPRESSED IN: hypophysis, root meristem; CONTAINS InterPro DOMAIN/s: NPH3 (InterPro:IPR004249), BTB/POZ fold (InterPro:IPR011333); BEST Arabidopsis thaliana protein match is: Phototropic-responsive NPH3 family protein (TAIR:AT5G67440.1)	BTB/POZ | BTB/POZ fold | NPH3 domain	NO
AT2G15050	0.679387	5.37392	0.00248535	0.034505	UP	lipid transfer protein	lipid transfer protein (LTP); FUNCTIONS IN: lipid binding; INVOLVED IN: lipid transport; LOCATED IN: endomembrane system; EXPRESSED IN: 20 plant structures; EXPRESSED DURING: 13 growth stages; CONTAINS InterPro DOMAIN/s: Bifunctional inhibitor/plant lipid transfer protein/seed storage (InterPro:IPR016140), Plant lipid transfer protein/seed storage/trypsin-alpha amylase inhibitor (InterPro:IPR0036…	Bifunctional inhibitor/plant lipid transfer protein/seed storage helical domain | Plant lipid transfer protein/Par allergen	NO
AT2G15090	-0.905757	7.31506	0.00112363	0.0181077	DOWN	3-ketoacyl-CoA synthase 8	3-ketoacyl-CoA synthase 8 (KCS8); FUNCTIONS IN: transferase activity, transferring acyl groups other than amino-acyl groups, catalytic activity, acyltransferase activity; INVOLVED IN: fatty acid elongation, very long-chain fatty acid metabolic process, response to osmotic stress; LOCATED IN: endoplasmic reticulum; EXPRESSED IN: 23 plant structures; EXPRESSED DURING: 13 growth stages; CONTAINS Int…	3-Oxoacyl-[acyl-carrier-protein (ACP)] synthase III C-terminal | FAE1/Type III polyketide synthase-like protein | Thiolase-like | Thiolase-like, subgroup | Very-long-chain 3-ketoacyl-CoA synthase	NO
AT2G15100	8.02635	1.20907	3.03802e-24	3.65441e-21	UP	transposable element gene	gypsy-like retrotransposon family, has a 4.0e-216 P-value blast match to GB:AAD19359 polyprotein (gypsy_Ty3-element) (Sorghum bicolor)		YES	2:6550873:G-A;exonic_variant
AT2G15120	7.97703	-0.5876	1.60538e-13	4.09628e-11	UP		pseudogene, disease-resistance family protein / fatty acid elongase-related, similar to fatty acid elongase 1 (FAE1) (Arabidopsis thaliana) GI:881615; similar to NtPRp27 (GI:5360263) (Nicotiana tabacum)\similar to R 14 protein (GI:27764542) (Glycine max); contains Pfam profile PF04450: Plant Basic Secretory Protein; blastp match of 71% identity and 6.0e-20 P-value to GP|18674893|emb|CAD23312.1||A…		NO
AT2G15220	1.96214	2.83057	2.56769e-09	2.52872e-07	UP	Plant basic secretory protein (BSP) family protein	Plant basic secretory protein (BSP) family protein; INVOLVED IN: defense response; LOCATED IN: endomembrane system; EXPRESSED DURING: seedling growth; CONTAINS InterPro DOMAIN/s: Uncharacterised protein family, basic secretory protein (InterPro:IPR007541); BEST Arabidopsis thaliana protein match is: Plant basic secretory protein (BSP) family protein (TAIR:AT2G15130.1)	Uncharacterised protein family, basic secretory protein	NO
AT2G15292	-0.690953	4.67605	0.0028273	0.0385688	DOWN				NO
AT2G15300	1.80554	0.536194	6.4985e-05	0.00174542	UP	Leucine-rich repeat protein kinase family protein	Leucine-rich repeat protein kinase family protein; FUNCTIONS IN: protein serine/threonine kinase activity, kinase activity, ATP binding; INVOLVED IN: transmembrane receptor protein tyrosine kinase signaling pathway, protein amino acid phosphorylation; LOCATED IN: endomembrane system; EXPRESSED IN: root; CONTAINS InterPro DOMAIN/s: Protein kinase, catalytic domain (InterPro:IPR000719), Leucine-ric…	Leucine-rich repeat | Leucine-rich repeat-containing N-terminal, type 2 | Protein kinase domain | Protein kinase-like domain	NO
AT2G15310	1.40453	2.86049	2.73091e-05	0.000853245	UP	ADP-ribosylation factor B1A	ADP-ribosylation factor B1A (ARFB1A); FUNCTIONS IN: GTP binding; INVOLVED IN: N-terminal protein myristoylation; LOCATED IN: intracellular; EXPRESSED IN: 13 plant structures; EXPRESSED DURING: 6 growth stages; CONTAINS InterPro DOMAIN/s: ADP-ribosylation factor (InterPro:IPR006688), Small GTP-binding protein (InterPro:IPR005225), ARF/SAR superfamily (InterPro:IPR006689); BEST Arabidopsis thaliana…	P-loop containing nucleoside triphosphate hydrolase | Small GTP-binding protein domain | Small GTPase superfamily, ARF type | Small GTPase superfamily, ARF/SAR type	NO
AT2G15370	1.63716	-0.038214	0.000220032	0.00479671	UP	fucosyltransferase 5	fucosyltransferase 5 (FUT5); FUNCTIONS IN: transferase activity, transferring glycosyl groups, fucosyltransferase activity; INVOLVED IN: cell wall biogenesis; LOCATED IN: endomembrane system, membrane; EXPRESSED IN: cauline leaf, flower, root, seed; CONTAINS InterPro DOMAIN/s: Xyloglucan fucosyltransferase (InterPro:IPR004938); BEST Arabidopsis thaliana protein match is: fucosyltransferase 4 (TAI…	Xyloglucan fucosyltransferase	NO
AT2G15480	-0.889428	3.82241	0.00210181	0.0300983	DOWN	UDP-glucosyl transferase 73B5	UDP-glucosyl transferase 73B5 (UGT73B5); FUNCTIONS IN: quercetin 3-O-glucosyltransferase activity, UDP-glycosyltransferase activity, UDP-glucosyltransferase activity, transferase activity, transferring glycosyl groups; INVOLVED IN: response to other organism; LOCATED IN: endomembrane system; EXPRESSED IN: 9 plant structures; EXPRESSED DURING: L mature pollen stage, M germinated pollen stage, LP.0…	UDP-glucuronosyl/UDP-glucosyltransferase	NO
AT2G15530	0.896014	5.41024	5.24265e-05	0.00146537	UP	RING/U-box superfamily protein	RING/U-box superfamily protein; FUNCTIONS IN: zinc ion binding; EXPRESSED IN: 23 plant structures; EXPRESSED DURING: 13 growth stages; CONTAINS InterPro DOMAIN/s: Zinc finger, RING-type (InterPro:IPR001841), Zinc finger, C3HC4 RING-type (InterPro:IPR018957); BEST Arabidopsis thaliana protein match is: RING/U-box superfamily protein (TAIR:AT4G34040.1)	Zinc finger, RING-type | Zinc finger, RING/FYVE/PHD-type	NO
AT2G15555	5.6654	-1.01644	3.21442e-06	0.000139697	UP	other RNA			NO
AT2G15880	2.08202	7.87566	1.54092e-11	2.56929e-09	UP	Leucine-rich repeat (LRR) family protein	Leucine-rich repeat (LRR) family protein; FUNCTIONS IN: structural constituent of cell wall; LOCATED IN: endomembrane system; EXPRESSED IN: 15 plant structures; EXPRESSED DURING: 8 growth stages; CONTAINS InterPro DOMAIN/s: Leucine-rich repeat (InterPro:IPR001611); BEST Arabidopsis thaliana protein match is: Leucine-rich repeat (LRR) family protein (TAIR:AT4G33970.1)	Leucine-rich repeat	NO
AT2G15940	2.25986	-0.783413	3.62144e-05	0.00108229	UP	transposable element gene	hAT-like transposase family (hobo/Ac/Tam3), has a 1.1e-114 P-value blast match to GB:AAD24567 transposase Tag2 (hAT-element) (Arabidopsis thaliana)		NO
AT2G15960	-0.813177	7.72227	0.00042918	0.00826958	DOWN		unknown protein		NO
AT2G16060	1.43349	4.35371	2.32915e-05	0.00074998	UP	hemoglobin 1	hemoglobin 1 (HB1); FUNCTIONS IN: oxygen binding; INVOLVED IN: response to hypoxia; LOCATED IN: cell wall, plasma membrane; EXPRESSED IN: 22 plant structures; EXPRESSED DURING: 14 growth stages; CONTAINS InterPro DOMAIN/s: Leghaemoglobin (InterPro:IPR001032), Globin-like (InterPro:IPR009050), Leghaemoglobin, iron-binding site (InterPro:IPR019824), Globin, subset (InterPro:IPR000971), Globin (Inte…	Globin | Globin, structural domain | Globin-like | Leghaemoglobin | Leghaemoglobin, iron-binding site	NO
AT2G16140	2.13968	-0.6394	8.29381e-05	0.00212591	UP	transposable element gene	similar to DNA binding [Arabidopsis thaliana] (TAIR:AT3G47680.1); similar to hypothetical protein 24.t00018 [Brassica oleracea] (GB:ABD64940.1); contains InterPro domain Homeodomain-like; (InterPro:IPR009057)	No apical meristem-associated, C-terminal domain	YES	2:7007838:C-CT;exonic_variant,2:7005448:A-G;exonic_variant,2:7007427:A-G;intronic_variant,2:7007427:A-G;exonic_variant,2:7005387:T-C;exonic_variant,2:7007835:C-T;intronic_variant,2:7007838:C-CT;intronic_variant,2:7007835:C-T;exonic_variant
AT2G16230	1.80705	-0.451862	0.000492041	0.00923923	UP	O-Glycosyl hydrolases family 17 protein	O-Glycosyl hydrolases family 17 protein; FUNCTIONS IN: cation binding, hydrolase activity, hydrolyzing O-glycosyl compounds, catalytic activity; INVOLVED IN: carbohydrate metabolic process; LOCATED IN: endomembrane system; EXPRESSED IN: root; CONTAINS InterPro DOMAIN/s: X8 (InterPro:IPR012946), Glycoside hydrolase, catalytic core (InterPro:IPR017853), Glycoside hydrolase, family 17 (InterPro:IPR0…	Glycoside hydrolase, catalytic domain | Glycoside hydrolase, family 17 | Glycoside hydrolase, superfamily | X8	NO
AT2G16365	0.959921	6.71962	0.00037034	0.00736329	UP	F-box family protein	F-box family protein; BEST Arabidopsis thaliana protein match is: unknown protein (TAIR:AT4G34550.1); FUNCTIONS IN: molecular_function unknown; INVOLVED IN: response to karrikin; LOCATED IN: cellular_component unknown; EXPRESSED IN: 22 plant structures; EXPRESSED DURING: 13 growth stages; CONTAINS InterPro DOMAIN/s: F-box domain, cyclin-like (InterPro:IPR001810); BEST Arabidopsis thaliana protein…	F-box domain	NO
AT2G16380	-0.775791	4.71235	0.00255335	0.0353325	DOWN	Sec14p-like phosphatidylinositol transfer family protein	Sec14p-like phosphatidylinositol transfer family protein; FUNCTIONS IN: transporter activity; INVOLVED IN: transport; LOCATED IN: intracellular; EXPRESSED IN: 10 plant structures; EXPRESSED DURING: 7 growth stages; CONTAINS InterPro DOMAIN/s: Cellular retinaldehyde-binding/triple function, C-terminal (InterPro:IPR001251), Cellular retinaldehyde-binding/triple function, N-terminal (InterPro:IPR008…	CRAL-TRIO domain | CRAL/TRIO, N-terminal domain | Cellular retinaldehyde binding/alpha-tocopherol transport	NO
AT2G16720	0.938608	4.14296	0.0029423	0.0397561	UP	myb domain protein 7	myb domain protein 7 (MYB7); CONTAINS InterPro DOMAIN/s: SANT, DNA-binding (InterPro:IPR001005), Homeodomain-like (InterPro:IPR009057), Myb, DNA-binding (InterPro:IPR014778), HTH transcriptional regulator, Myb-type, DNA-binding (InterPro:IPR017930), Homeodomain-related (InterPro:IPR012287), Myb transcription factor (InterPro:IPR015495); BEST Arabidopsis thaliana protein match is: myb domain prote…	Homeodomain-like | Myb domain | SANT/Myb domain	NO
AT2G16890	1.31364	2.25197	0.00109679	0.0177858	UP	UDP-Glycosyltransferase superfamily protein	UDP-Glycosyltransferase superfamily protein; FUNCTIONS IN: transferase activity, transferring hexosyl groups, UDP-glycosyltransferase activity, transferase activity, transferring glycosyl groups; INVOLVED IN: metabolic process; LOCATED IN: endomembrane system; EXPRESSED IN: 17 plant structures; EXPRESSED DURING: 7 growth stages; CONTAINS InterPro DOMAIN/s: UDP-glucuronosyl/UDP-glucosyltransferase…	Tudor domain | UDP-glucuronosyl/UDP-glucosyltransferase	NO
AT2G16980	1.76436	2.22919	2.68447e-05	0.000840294	UP	Major facilitator superfamily protein	Major facilitator superfamily protein; FUNCTIONS IN: tetracycline transporter activity; INVOLVED IN: response to antibiotic, tetracycline transport, transmembrane transport; LOCATED IN: endomembrane system, integral to membrane; EXPRESSED IN: 6 plant structures; EXPRESSED DURING: L mature pollen stage, 4 anthesis; CONTAINS InterPro DOMAIN/s: Tetracycline resistance protein, TetA (InterPro:IPR0019…	Major facilitator superfamily | Major facilitator superfamily domain, general substrate transporter | Tetracycline resistance protein, TetA/multidrug resistance protein MdtG	NO
AT2G17036	1.37198	3.35126	9.79444e-06	0.000361221	UP	F-box family protein with a domain of unknown function (DUF295)	CONTAINS InterPro DOMAIN/s: F-box domain, cyclin-like (InterPro:IPR001810), Protein of unknown function DUF295 (InterPro:IPR005174); BEST Arabidopsis thaliana protein match is: F-box family protein with a domain of unknown function (DUF295) (TAIR:AT2G17030.1)		NO
AT2G17070	2.38182	0.0864005	9.28921e-07	4.7621e-05	UP	Arabidopsis protein of unknown function (DUF241)	Arabidopsis protein of unknown function (DUF241); CONTAINS InterPro DOMAIN/s: Protein of unknown function DUF241, plant (InterPro:IPR004320); BEST Arabidopsis thaliana protein match is: Arabidopsis protein of unknown function (DUF241) (TAIR:AT2G17080.1)	Protein of unknown function DUF241, plant	NO
AT2G17080	1.51919	0.497164	0.0037083	0.0475264	UP	Arabidopsis protein of unknown function (DUF241)	Arabidopsis protein of unknown function (DUF241); FUNCTIONS IN: molecular_function unknown; INVOLVED IN: biological_process unknown; LOCATED IN: chloroplast; EXPRESSED IN: root; CONTAINS InterPro DOMAIN/s: Protein of unknown function DUF241, plant (InterPro:IPR004320); BEST Arabidopsis thaliana protein match is: Arabidopsis protein of unknown function (DUF241) (TAIR:AT2G17070.1)	Protein of unknown function DUF241, plant	NO
AT2G17280	1.67619	3.88858	6.65189e-08	4.63856e-06	UP	Phosphoglycerate mutase family protein	Phosphoglycerate mutase family protein; FUNCTIONS IN: catalytic activity; INVOLVED IN: metabolic process; LOCATED IN: cellular_component unknown; EXPRESSED IN: 24 plant structures; EXPRESSED DURING: 13 growth stages; CONTAINS InterPro DOMAIN/s: Histidine phosphatase superfamily, clade-1 (InterPro:IPR013078); BEST Arabidopsis thaliana protein match is: Phosphoglycerate mutase family protein (TAIR:…	Histidine phosphatase superfamily | Histidine phosphatase superfamily, clade-1	NO
AT2G17695	0.803581	5.44215	0.000720248	0.0125758	UP		FUNCTIONS IN: molecular_function unknown; INVOLVED IN: biological_process unknown; CONTAINS InterPro DOMAIN/s: Domain of unknown function DUF1990 (InterPro:IPR018960); LOCATED IN: chloroplast	Domain of unknown function DUF1990	NO
AT2G17700	0.738675	5.17928	0.00128371	0.0200854	UP	ACT-like protein tyrosine kinase family protein	ACT-like protein tyrosine kinase family protein; FUNCTIONS IN: protein serine/threonine/tyrosine kinase activity, protein kinase activity; INVOLVED IN: protein amino acid phosphorylation, metabolic process; LOCATED IN: cytosol; EXPRESSED IN: 23 plant structures; EXPRESSED DURING: 14 growth stages; CONTAINS InterPro DOMAIN/s: Protein kinase, catalytic domain (InterPro:IPR000719), Amino acid-bindin…	ACT domain | Protein kinase domain | Protein kinase-like domain | Serine-threonine/tyrosine-protein kinase catalytic domain | Serine/threonine-protein kinase, active site	NO
AT2G17710	0.803466	4.20807	0.00256682	0.0355044	UP		unknown protein		NO
AT2G17720	0.932279	5.76606	7.97363e-05	0.00206267	UP	2-oxoglutarate (2OG) and Fe(II)-dependent oxygenase superfamily protein	2-oxoglutarate (2OG) and Fe(II)-dependent oxygenase superfamily protein; FUNCTIONS IN: oxidoreductase activity, acting on paired donors, with incorporation or reduction of molecular oxygen, 2-oxoglutarate as one donor, and incorporation of one atom each of oxygen into both donors, oxidoreductase activity, oxidoreductase activity, acting on paired donors, with incorporation or reduction of molecul…	Oxoglutarate/iron-dependent dioxygenase | Prolyl 4-hydroxylase, alpha subunit	NO
AT2G17850	2.15787	0.54206	0.00289286	0.039209	UP	Rhodanese/Cell cycle control phosphatase superfamily protein	Rhodanese/Cell cycle control phosphatase superfamily protein; FUNCTIONS IN: molecular_function unknown; INVOLVED IN: aging; LOCATED IN: endomembrane system; EXPRESSED IN: 9 plant structures; EXPRESSED DURING: 9 growth stages; CONTAINS InterPro DOMAIN/s: Rhodanese-like (InterPro:IPR001763); BEST Arabidopsis thaliana protein match is: sulfurtransferase 18 (TAIR:AT5G66170.3)	Rhodanese-like domain	NO
AT2G17890	2.28901	-1.33008	0.000350244	0.00704273	UP	calcium-dependent protein kinase 16	calcium-dependent protein kinase 16 (CPK16); FUNCTIONS IN: protein serine/threonine kinase activity, calmodulin-dependent protein kinase activity, protein kinase activity, calcium ion binding, ATP binding; INVOLVED IN: protein amino acid phosphorylation, N-terminal protein myristoylation; LOCATED IN: chloroplast; EXPRESSED IN: 12 plant structures; EXPRESSED DURING: L mature pollen stage, M germin…	EF-Hand 1, calcium-binding site | EF-hand domain | EF-hand domain pair | Protein kinase domain | Protein kinase, ATP binding site | Protein kinase-like domain | Serine/threonine-protein kinase, active site | Serine/threonine/dual specificity protein kinase, catalytic domain	NO
AT2G17972	-1.06633	4.33378	3.0973e-05	0.00094493	DOWN		unknown protein; FUNCTIONS IN: molecular_function unknown; INVOLVED IN: biological_process unknown; LOCATED IN: chloroplast thylakoid membrane, chloroplast; EXPRESSED IN: 22 plant structures; EXPRESSED DURING: 14 growth stages		NO
AT2G18060	1.26833	1.29268	0.00142154	0.0218227	UP	vascular related NAC-domain protein 1	vascular related NAC-domain protein 1 (VND1); CONTAINS InterPro DOMAIN/s: No apical meristem (NAM) protein (InterPro:IPR003441); BEST Arabidopsis thaliana protein match is: NAC domain containing protein 76 (TAIR:AT4G36160.1)	NAC domain	NO
AT2G18150	1.97434	0.679429	2.16292e-05	0.000706589	UP	Peroxidase superfamily protein	Peroxidase superfamily protein; FUNCTIONS IN: peroxidase activity, heme binding; INVOLVED IN: response to oxidative stress, oxidation reduction, response to nematode; LOCATED IN: cell wall; CONTAINS InterPro DOMAIN/s: Haem peroxidase (InterPro:IPR010255), Plant peroxidase (InterPro:IPR000823), Peroxidases heam-ligand binding site (InterPro:IPR019793), Haem peroxidase, plant/fungal/bacterial (Inte…	Haem peroxidase | Haem peroxidase, plant/fungal/bacterial | Peroxidase, active site | Peroxidases heam-ligand binding site | Plant peroxidase	NO
AT2G18193	1.96163	2.30423	1.39724e-08	1.13126e-06	UP	P-loop containing nucleoside triphosphate hydrolases superfamily protein	P-loop containing nucleoside triphosphate hydrolases superfamily protein; FUNCTIONS IN: nucleoside-triphosphatase activity, ATPase activity, nucleotide binding, ATP binding; LOCATED IN: endomembrane system; EXPRESSED IN: callus; CONTAINS InterPro DOMAIN/s: ATPase, AAA-type, core (InterPro:IPR003959), ATPase, AAA+ type, core (InterPro:IPR003593), ATPase, AAA-type, conserved site (InterPro:IPR00396…	AAA+ ATPase domain | AAA-type ATPase, N-terminal domain | ATPase, AAA-type, conserved site | ATPase, AAA-type, core | P-loop containing nucleoside triphosphate hydrolase	NO
AT2G18328	-1.49478	1.14513	0.000788411	0.0135829	DOWN	RAD-like 4	RAD-like 4 (RL4); FUNCTIONS IN: DNA binding; EXPRESSED IN: rosette leaf; CONTAINS InterPro DOMAIN/s: SANT, DNA-binding (InterPro:IPR001005), Molecular chaperone, heat shock protein, Hsp40, DnaJ (InterPro:IPR015609), Homeodomain-like (InterPro:IPR009057), Myb, DNA-binding (InterPro:IPR014778), SANT, eukarya (InterPro:IPR017884); BEST Arabidopsis thaliana protein match is: RAD-like 1 (TAIR:AT4G3925…	Homeodomain-like | SANT domain | SANT/Myb domain	NO
AT2G18370	2.26483	5.00769	1.32916e-16	6.21771e-14	UP	Bifunctional inhibitor/lipid-transfer protein/seed storage 2S albumin superfamily protein	Bifunctional inhibitor/lipid-transfer protein/seed storage 2S albumin superfamily protein; FUNCTIONS IN: lipid binding; INVOLVED IN: lipid transport; LOCATED IN: endomembrane system; EXPRESSED IN: leaf whorl, embryo, hypocotyl, male gametophyte, root; EXPRESSED DURING: C globular stage; CONTAINS InterPro DOMAIN/s: Bifunctional inhibitor/plant lipid transfer protein/seed storage (InterPro:IPR01614…	Bifunctional inhibitor/plant lipid transfer protein/seed storage helical domain | Plant lipid transfer protein/Par allergen	NO
AT2G18440	-0.93906	8.55334	4.2795e-05	0.00123852	DOWN	GUT15 (GENE WITH UNSTABLE TRANSCRIPT 15); other RNA			NO
AT2G18465	1.17016	3.80117	1.20646e-05	0.000430909	UP	Chaperone DnaJ-domain superfamily protein	Chaperone DnaJ-domain superfamily protein; FUNCTIONS IN: heat shock protein binding; INVOLVED IN: protein folding; LOCATED IN: cellular_component unknown; CONTAINS InterPro DOMAIN/s: Molecular chaperone, heat shock protein, Hsp40, DnaJ (InterPro:IPR015609), Heat shock protein DnaJ, N-terminal (InterPro:IPR001623); BEST Arabidopsis thaliana protein match is: Chaperone DnaJ-domain superfamily prote…	DnaJ domain	NO
AT2G18560	-1.7242	3.77248	1.23612e-06	6.11364e-05	DOWN	UDP-Glycosyltransferase superfamily protein	UDP-Glycosyltransferase superfamily protein; FUNCTIONS IN: UDP-glycosyltransferase activity, transferase activity, transferring glycosyl groups; INVOLVED IN: metabolic process; LOCATED IN: cellular_component unknown; CONTAINS InterPro DOMAIN/s: UDP-glucuronosyl/UDP-glucosyltransferase (InterPro:IPR002213); BEST Arabidopsis thaliana protein match is: UDP-Glycosyltransferase superfamily protein (TA…	UDP-glucuronosyl/UDP-glucosyltransferase	NO
AT2G18570	1.34704	3.53118	3.60464e-06	0.000153875	UP	UDP-Glycosyltransferase superfamily protein	UDP-Glycosyltransferase superfamily protein; FUNCTIONS IN: transferase activity, transferring glycosyl groups; INVOLVED IN: metabolic process; LOCATED IN: cellular_component unknown; CONTAINS InterPro DOMAIN/s: UDP-glucuronosyl/UDP-glucosyltransferase (InterPro:IPR002213); BEST Arabidopsis thaliana protein match is: UDP-Glycosyltransferase superfamily protein (TAIR:AT2G18560.1)	UDP-glucuronosyl/UDP-glucosyltransferase	NO
AT2G18680	1.85091	0.978608	1.88449e-05	0.000628431	UP		unknown protein; FUNCTIONS IN: molecular_function unknown; INVOLVED IN: biological_process unknown; LOCATED IN: endomembrane system; EXPRESSED IN: male gametophyte, pollen tube; EXPRESSED DURING: L mature pollen stage, M germinated pollen stage; BEST Arabidopsis thaliana protein match is: unknown protein (TAIR:AT2G18690.1)		NO
AT2G18700	-1.23883	7.28786	0.00121313	0.0192099	DOWN	trehalose phosphatase/synthase 11	trehalose phosphatase/synthase 11 (TPS11); FUNCTIONS IN: transferase activity, transferring glycosyl groups; INVOLVED IN: trehalose biosynthetic process, metabolic process; LOCATED IN: mitochondrion; EXPRESSED IN: 27 plant structures; EXPRESSED DURING: 15 growth stages; CONTAINS InterPro DOMAIN/s: HAD-superfamily hydrolase, subfamily IIB (InterPro:IPR006379), Glycosyl transferase, family 20 (Inte…	Glycosyl transferase, family 20 | HAD-like domain | HAD-superfamily hydrolase, subfamily IIB | Trehalose-phosphatase	NO
AT2G18760	1.11806	4.70797	7.91003e-06	0.000301719	UP	chromatin remodeling 8	chromatin remodeling 8 (CHR8); FUNCTIONS IN: helicase activity, DNA binding, ATP binding, nucleic acid binding; INVOLVED IN: DNA repair, response to gamma radiation; EXPRESSED IN: 15 plant structures; EXPRESSED DURING: 6 growth stages; CONTAINS InterPro DOMAIN/s: DEAD-like helicase, N-terminal (InterPro:IPR014001), DNA/RNA helicase, C-terminal (InterPro:IPR001650), Helicase, superfamily 1/2, ATP-…	Helicase, C-terminal | Helicase, superfamily 1/2, ATP-binding domain | P-loop containing nucleoside triphosphate hydrolase | SNF2-related	NO
AT2G18800	-1.89039	-0.940412	0.00115562	0.0185266	DOWN	xyloglucan endotransglucosylase/hydrolase 21	xyloglucan endotransglucosylase/hydrolase 21 (XTH21); FUNCTIONS IN: hydrolase activity, acting on glycosyl bonds, xyloglucan endotransglucosylase activity; INVOLVED IN: primary root development, cell wall modification; LOCATED IN: endomembrane system, apoplast, cell wall; EXPRESSED IN: stem, root, flower, leaf; CONTAINS InterPro DOMAIN/s: Xyloglucan endotransglucosylase/hydrolase (InterPro:IPR016…	Concanavalin A-like lectin/glucanase, subgroup | Concanavalin A-like lectin/glucanases superfamily | Glycoside hydrolase, family 16 | Glycoside hydrolase, family 16, active site | Xyloglucan endo-transglycosylase, C-terminal | Xyloglucan endotransglucosylase/hydrolase	NO
AT2G18876	1.15997	5.35268	2.39748e-06	0.000107954	UP	Afadin/alpha-actinin-binding protein	Afadin/alpha-actinin-binding protein; CONTAINS InterPro DOMAIN/s: Afadin/alpha-actinin-binding (InterPro:IPR021622); BEST Arabidopsis thaliana protein match is: Afadin/alpha-actinin-binding protein (TAIR:AT5G57410.2); BEST Arabidopsis thaliana protein match is: Afadin/alpha-actinin-binding protein (TAIR:AT5G57410.3)	Afadin/alpha-actinin-binding	NO
AT2G18950	1.62841	6.03299	1.43003e-08	1.15136e-06	UP	homogentisate phytyltransferase 1	homogentisate phytyltransferase 1 (HPT1); CONTAINS InterPro DOMAIN/s: UbiA prenyltransferase (InterPro:IPR000537); BEST Arabidopsis thaliana protein match is: homogentisate prenyltransferase (TAIR:AT3G11945.1)	UbiA prenyltransferase family	NO
AT2G18980	1.63765	4.39375	2.47439e-08	1.89841e-06	UP	Peroxidase superfamily protein	Peroxidase superfamily protein; FUNCTIONS IN: peroxidase activity, heme binding; INVOLVED IN: oxidation reduction, response to oxidative stress; LOCATED IN: endomembrane system; EXPRESSED IN: 6 plant structures; EXPRESSED DURING: LP.04 four leaves visible, petal differentiation and expansion stage; CONTAINS InterPro DOMAIN/s: Haem peroxidase (InterPro:IPR010255), Plant peroxidase (InterPro:IPR000…	Haem peroxidase | Haem peroxidase, plant/fungal/bacterial | Peroxidase, active site | Peroxidases heam-ligand binding site | Plant peroxidase	NO
AT2G19170	1.44578	5.06416	8.97236e-09	7.68969e-07	UP	subtilisin-like serine protease 3	subtilisin-like serine protease 3 (SLP3); FUNCTIONS IN: serine-type peptidase activity; INVOLVED IN: proteolysis, negative regulation of catalytic activity; LOCATED IN: middle lamella-containing extracellular matrix; EXPRESSED IN: 22 plant structures; EXPRESSED DURING: 13 growth stages; CONTAINS InterPro DOMAIN/s: Protease-associated PA (InterPro:IPR003137), Proteinase inhibitor, propeptide (Inte…	Peptidase S8, subtilisin, Asp-active site | Peptidase S8, subtilisin, Ser-active site | Peptidase S8, subtilisin-related | Peptidase S8/S53 domain | Peptidase S8A, DUF1034 C-terminal | Protease-associated domain, PA | Proteinase inhibitor I9 | Proteinase inhibitor, propeptide	NO
AT2G19440	2.72893	-0.27997	1.58869e-05	0.000545451	UP	O-Glycosyl hydrolases family 17 protein	O-Glycosyl hydrolases family 17 protein; FUNCTIONS IN: cation binding, hydrolase activity, hydrolyzing O-glycosyl compounds, catalytic activity; INVOLVED IN: carbohydrate metabolic process; LOCATED IN: plasma membrane, anchored to membrane; EXPRESSED IN: male gametophyte, pollen tube; EXPRESSED DURING: M germinated pollen stage; CONTAINS InterPro DOMAIN/s: X8 (InterPro:IPR012946), Glycoside hydro…	Glycoside hydrolase, catalytic domain | Glycoside hydrolase, family 17 | Glycoside hydrolase, superfamily | X8	NO
AT2G19590	1.39458	3.35999	0.000388754	0.00767054	UP	ACC oxidase 1	ACC oxidase 1 (ACO1); CONTAINS InterPro DOMAIN/s: Oxoglutarate/iron-dependent oxygenase (InterPro:IPR005123); BEST Arabidopsis thaliana protein match is: 2-oxoglutarate (2OG) and Fe(II)-dependent oxygenase superfamily protein (TAIR:AT1G12010.1)	Isopenicillin N synthase-like | Non-haem dioxygenase N-terminal domain | Oxoglutarate/iron-dependent dioxygenase	NO
AT2G19880	0.755854	5.19595	0.00076636	0.0132845	UP	Nucleotide-diphospho-sugar transferases superfamily protein	Nucleotide-diphospho-sugar transferases superfamily protein; FUNCTIONS IN: ceramide glucosyltransferase activity; INVOLVED IN: biological_process unknown; LOCATED IN: endomembrane system; EXPRESSED IN: 24 plant structures; EXPRESSED DURING: 15 growth stages; CONTAINS InterPro DOMAIN/s: Glycosyl transferase, family 2 (InterPro:IPR001173)	Ceramide glucosyltransferase | Nucleotide-diphospho-sugar transferases	NO
AT2G19930	-0.967516	3.81179	0.000406463	0.00794548	DOWN	RNA-dependent RNA polymerase family protein	RNA-dependent RNA polymerase family protein; FUNCTIONS IN: RNA-directed RNA polymerase activity; INVOLVED IN: posttranscriptional gene silencing; LOCATED IN: cellular_component unknown; EXPRESSED IN: 14 plant structures; EXPRESSED DURING: 6 growth stages; CONTAINS InterPro DOMAIN/s: RNA-dependent RNA polymerase, eukaryotic-type (InterPro:IPR007855); BEST Arabidopsis thaliana protein match is: RNA…	RNA-dependent RNA polymerase, eukaryotic-type	NO
AT2G20290	0.735194	4.38954	0.00167879	0.0249419	UP	myosin-like protein XIG	myosin-like protein XIG (XIG); FUNCTIONS IN: motor activity; INVOLVED IN: actin filament-based movement; LOCATED IN: endomembrane system, myosin complex; EXPRESSED IN: 23 plant structures; EXPRESSED DURING: 13 growth stages; CONTAINS InterPro DOMAIN/s: Dil domain (InterPro:IPR018444), Dilute (InterPro:IPR002710), Myosin, N-terminal, SH3-like (InterPro:IPR004009), Myosin head, motor domain (InterP…	Dil domain | Dilute | IQ motif, EF-hand binding site | Myosin head, motor domain | Myosin, N-terminal, SH3-like | P-loop containing nucleoside triphosphate hydrolase	NO
AT2G20515	1.43691	2.64997	0.00039801	0.00781198	UP		unknown protein; FUNCTIONS IN: molecular_function unknown; INVOLVED IN: biological_process unknown; LOCATED IN: endomembrane system; EXPRESSED IN: 16 plant structures; EXPRESSED DURING: 7 growth stages		NO
AT2G20725	-0.783391	4.74567	0.000483226	0.00910265	DOWN	CAAX amino terminal protease family protein	CAAX amino terminal protease family protein; FUNCTIONS IN: molecular_function unknown; INVOLVED IN: proteolysis; LOCATED IN: chloroplast, membrane; EXPRESSED IN: 22 plant structures; EXPRESSED DURING: 13 growth stages; CONTAINS InterPro DOMAIN/s: Abortive infection protein (InterPro:IPR003675); BEST Arabidopsis thaliana protein match is: CAAX amino terminal protease family protein (TAIR:AT1G14270…	CAAX amino terminal protease	NO
AT2G20830	0.987497	5.48723	1.88159e-05	0.000628084	UP	transferases;folic acid binding	transferases;folic acid binding; FUNCTIONS IN: folic acid binding, transferase activity; INVOLVED IN: metabolic process; LOCATED IN: endomembrane system; EXPRESSED IN: 24 plant structures; CONTAINS InterPro DOMAIN/s: Formiminotransferase, N-terminal subdomain (InterPro:IPR012886), Essential protein Yae1, N-terminal (InterPro:IPR019191), Formiminotransferas, N- and C-terminal subdomains (InterPro:…	Formiminotransferas, N- and C-terminal subdomains | Formiminotransferase, N-terminal subdomain	NO
AT2G20880	2.55344	0.0639454	2.24602e-05	0.000730349	UP	Integrase-type DNA-binding superfamily protein	Integrase-type DNA-binding superfamily protein; FUNCTIONS IN: DNA binding, sequence-specific DNA binding transcription factor activity; INVOLVED IN: regulation of transcription, DNA-dependent; LOCATED IN: nucleus, cytoplasm; EXPRESSED IN: stamen; EXPRESSED DURING: 4 anthesis, petal differentiation and expansion stage; CONTAINS InterPro DOMAIN/s: DNA-binding, integrase-type (InterPro:IPR016177), P…	AP2/ERF domain | DNA-binding domain	NO
AT2G21100	1.8839	1.7871	1.34836e-05	0.000474052	UP	Disease resistance-responsive (dirigent-like protein) family protein	Disease resistance-responsive (dirigent-like protein) family protein; FUNCTIONS IN: molecular_function unknown; INVOLVED IN: lignan biosynthetic process, defense response; LOCATED IN: endomembrane system; EXPRESSED IN: hypocotyl, root, flower; EXPRESSED DURING: petal differentiation and expansion stage; CONTAINS InterPro DOMAIN/s: Plant disease resistance response protein (InterPro:IPR004265); BE…	Plant disease resistance response protein	YES	2:9048524:G-GT;intronic_variant,2:9048524:G-GT;exonic_variant
AT2G21187	1.4214	0.724606	0.00121127	0.0191895	UP	other RNA			NO
AT2G21300	0.681177	6.16165	0.00240283	0.0335669	UP	ATP binding microtubule motor family protein	ATP binding microtubule motor family protein; FUNCTIONS IN: microtubule motor activity, ATP binding; INVOLVED IN: microtubule-based movement; LOCATED IN: plasma membrane; EXPRESSED IN: 22 plant structures; EXPRESSED DURING: 11 growth stages; CONTAINS InterPro DOMAIN/s: Protein of unknown function DUF3490 (InterPro:IPR021881), Kinesin, motor region, conserved site (InterPro:IPR019821), Kinesin, mo…	Kinesin, motor domain | Kinesin, motor region, conserved site | Kinesin-like protein | P-loop containing nucleoside triphosphate hydrolase | Protein of unknown function DUF3490	NO
AT2G21430	1.19487	2.32754	0.000812199	0.0138932	UP	Papain family cysteine protease	Papain family cysteine protease; FUNCTIONS IN: cysteine-type endopeptidase activity, cysteine-type peptidase activity; INVOLVED IN: proteolysis; LOCATED IN: endomembrane system; EXPRESSED IN: 17 plant structures; EXPRESSED DURING: 9 growth stages; CONTAINS InterPro DOMAIN/s: Peptidase C1A, papain (InterPro:IPR013128), Proteinase inhibitor I29, cathepsin propeptide (InterPro:IPR013201), Peptidase …	Cysteine peptidase, asparagine active site | Cysteine peptidase, cysteine active site | Cysteine peptidase, histidine active site | Peptidase C1A | Peptidase C1A, papain C-terminal | Proteinase inhibitor I29, cathepsin propeptide	NO
AT2G21550	3.26353	3.49244	1.24706e-21	1.05005e-18	UP	Bifunctional dihydrofolate reductase/thymidylate synthase	Bifunctional dihydrofolate reductase/thymidylate synthase; FUNCTIONS IN: thymidylate synthase activity, dihydrofolate reductase activity; INVOLVED IN: oxidation reduction, glycine biosynthetic process, one-carbon metabolic process, nucleotide biosynthetic process, dTMP biosynthetic process; EXPRESSED IN: stem, hypocotyl, root; CONTAINS InterPro DOMAIN/s: Dihydrofolate reductase domain (InterPro:I…	Bifunctional dihydrofolate reductase/thymidylate synthase | Dihydrofolate reductase conserved site | Dihydrofolate reductase domain | Dihydrofolate reductase-like domain | Thymidylate synthase | Thymidylate synthase/dCMP hydroxymethylase domain	NO
AT2G21590	1.42358	5.3611	4.63472e-10	5.49655e-08	UP	Glucose-1-phosphate adenylyltransferase family protein	APL4; CONTAINS InterPro DOMAIN/s: ADP-glucose pyrophosphorylase, conserved site (InterPro:IPR005836), Glucose-1-phosphate adenylyltransferase (InterPro:IPR011831), Nucleotidyl transferase (InterPro:IPR005835); CONTAINS InterPro DOMAIN/s: Glucose-1-phosphate adenylyltransferase (InterPro:IPR011831), ADP-glucose pyrophosphorylase, conserved site (InterPro:IPR005836), Nucleotidyl transferase (InterP…	ADP-glucose pyrophosphorylase, conserved site | Glucose-1-phosphate adenylyltransferase | Nucleotide-diphospho-sugar transferases | Nucleotidyl transferase | Trimeric LpxA-like	YES	2:9240518:T-TC;intronic_variant
AT2G21850	1.09646	2.66333	0.000785085	0.0135394	UP	Cysteine/Histidine-rich C1 domain family protein	Cysteine/Histidine-rich C1 domain family protein; FUNCTIONS IN: zinc ion binding; INVOLVED IN: intracellular signaling pathway; LOCATED IN: cellular_component unknown; EXPRESSED IN: embryo, hypocotyl, root; EXPRESSED DURING: D bilateral stage; CONTAINS InterPro DOMAIN/s: Protein kinase C-like, phorbol ester/diacylglycerol binding (InterPro:IPR002219), Zinc finger, PHD-type, conserved site (InterP…	C1-like | DC1 | Protein kinase C-like, phorbol ester/diacylglycerol-binding domain | Zinc finger, PHD-type | Zinc finger, PHD-type, conserved site | Zinc finger, RING/FYVE/PHD-type	NO
AT2G21940	1.059	4.53815	2.32565e-05	0.000749571	UP	shikimate kinase 1	shikimate kinase 1 (SK1); FUNCTIONS IN: shikimate kinase activity, ATP binding; EXPRESSED IN: 19 plant structures; EXPRESSED DURING: 10 growth stages; CONTAINS InterPro DOMAIN/s: Shikimate kinase (InterPro:IPR000623); BEST Arabidopsis thaliana protein match is: shikimate kinase 2 (TAIR:AT4G39540.2)	P-loop containing nucleoside triphosphate hydrolase | Shikimate kinase, conserved site | Shikimate kinase/Threonine synthase-like 1	NO
AT2G22170	1.45144	6.52571	3.7605e-06	0.000158718	UP	Lipase/lipooxygenase, PLAT/LH2 family protein	Lipase/lipooxygenase, PLAT/LH2 family protein; FUNCTIONS IN: molecular_function unknown; INVOLVED IN: biological_process unknown; LOCATED IN: thylakoid, chloroplast, membrane; EXPRESSED IN: 19 plant structures; EXPRESSED DURING: 13 growth stages; CONTAINS InterPro DOMAIN/s: Lipoxygenase, LH2 (InterPro:IPR001024), Lipase/lipooxygenase, PLAT/LH2 (InterPro:IPR008976); BEST Arabidopsis thaliana prote…	Lipase/lipooxygenase, PLAT/LH2 | PLAT/LH2 domain	NO
AT2G22330	-1.15888	5.38258	0.000429445	0.00826995	DOWN	cytochrome P450, family 79, subfamily B, polypeptide 3	cytochrome P450, family 79, subfamily B, polypeptide 3 (CYP79B3); FUNCTIONS IN: electron carrier activity, monooxygenase activity, iron ion binding, oxygen binding, heme binding; INVOLVED IN: in 10 processes; LOCATED IN: chloroplast; EXPRESSED IN: 24 plant structures; EXPRESSED DURING: 12 growth stages; CONTAINS InterPro DOMAIN/s: Cytochrome P450 (InterPro:IPR001128), Cytochrome P450, E-class, gr…	Cytochrome P450 | Cytochrome P450, E-class, group I | Cytochrome P450, conserved site	NO
AT2G22450	-0.864435	5.96312	0.00125837	0.0198052	DOWN	riboflavin biosynthesis protein, putative	riboflavin biosynthesis protein, putative; FUNCTIONS IN: 3,4-dihydroxy-2-butanone-4-phosphate synthase activity, GTP cyclohydrolase II activity; INVOLVED IN: riboflavin biosynthetic process; LOCATED IN: chloroplast; EXPRESSED IN: 23 plant structures; EXPRESSED DURING: 13 growth stages; CONTAINS InterPro DOMAIN/s: GTP cyclohydrolase II (InterPro:IPR000926), Riboflavin biosynthesis protein RibA (In…	3,4-dihydroxy-2-butanone 4-phosphate synthase, RibB | DHBP synthase RibB-like alpha/beta domain | GTP cyclohydrolase II, RibA | Riboflavin biosynthesis protein RibBA	NO
AT2G22470	1.61733	4.96883	7.28265e-08	5.03669e-06	UP	arabinogalactan protein 2	arabinogalactan protein 2 (AGP2); BEST Arabidopsis thaliana protein match is: arabinogalactan protein 3 (TAIR:AT4G40090.1)		NO
AT2G22480	0.766569	5.54726	0.000644586	0.0115603	UP	phosphofructokinase 5	phosphofructokinase 5 (PFK5); CONTAINS InterPro DOMAIN/s: Pyrophosphate-dependent phosphofructokinase TP0108 (InterPro:IPR012004), Phosphofructokinase (InterPro:IPR000023); BEST Arabidopsis thaliana protein match is: phosphofructokinase 4 (TAIR:AT5G61580.1)	Phosphofructokinase | Phosphofructokinase domain | Pyrophosphate-dependent phosphofructokinase TP0108	NO
AT2G22510	1.90109	3.56572	5.72736e-10	6.69803e-08	UP	hydroxyproline-rich glycoprotein family protein	hydroxyproline-rich glycoprotein family protein; FUNCTIONS IN: molecular_function unknown; INVOLVED IN: biological_process unknown; LOCATED IN: endomembrane system; EXPRESSED IN: shoot apex, hypocotyl, root, leaf; BEST Arabidopsis thaliana protein match is: hydroxyproline-rich glycoprotein family protein (TAIR:AT4G38080.1)		NO
AT2G22630	2.05874	2.02222	1.35772e-07	8.727e-06	UP	AGAMOUS-like 17	AGAMOUS-like 17 (AGL17); FUNCTIONS IN: sequence-specific DNA binding transcription factor activity; INVOLVED IN: positive regulation of long-day photoperiodism, flowering; LOCATED IN: nucleus; EXPRESSED IN: 7 plant structures; EXPRESSED DURING: L mature pollen stage; CONTAINS InterPro DOMAIN/s: Transcription factor, MADS-box (InterPro:IPR002100), Transcription factor, K-box (InterPro:IPR002487); …	Transcription factor, K-box | Transcription factor, MADS-box	NO
AT2G22795	0.839476	6.49329	0.000186356	0.00417886	UP		unknown protein; BEST Arabidopsis thaliana protein match is: unknown protein (TAIR:AT4G37820.1)		NO
AT2G22800	1.29047	3.91542	1.14202e-05	0.000411385	UP	Homeobox-leucine zipper protein family	HAT9; FUNCTIONS IN: DNA binding, sequence-specific DNA binding transcription factor activity; INVOLVED IN: regulation of transcription, DNA-dependent, regulation of transcription; LOCATED IN: nucleus; EXPRESSED IN: 13 plant structures; EXPRESSED DURING: LP.04 four leaves visible, 4 anthesis, petal differentiation and expansion stage, E expanded cotyledon stage; CONTAINS InterPro DOMAIN/s: Homeobo…	Homeobox domain | Homeobox, conserved site | Homeodomain-like | Leucine zipper, homeobox-associated	NO
AT2G22840	0.933826	5.11237	0.000152225	0.00354082	UP	growth-regulating factor 1	growth-regulating factor 1 (GRF1); CONTAINS InterPro DOMAIN/s: Glutamine-Leucine-Glutamine, QLQ (InterPro:IPR014978), WRC (InterPro:IPR014977); BEST Arabidopsis thaliana protein match is: growth-regulating factor 2 (TAIR:AT4G37740.1)	Glutamine-Leucine-Glutamine, QLQ | WRC	NO
AT2G22980	-0.951833	7.48802	0.0025758	0.0355701	DOWN	serine carboxypeptidase-like 13	serine carboxypeptidase-like 13 (SCPL13); FUNCTIONS IN: serine-type carboxypeptidase activity; INVOLVED IN: proteolysis; LOCATED IN: endomembrane system; EXPRESSED IN: 23 plant structures; EXPRESSED DURING: 13 growth stages; CONTAINS InterPro DOMAIN/s: Peptidase S10, serine carboxypeptidase (InterPro:IPR001563); BEST Arabidopsis thaliana protein match is: serine carboxypeptidase-like 11 (TAIR:AT2…	Alpha/Beta hydrolase fold | Peptidase S10, serine carboxypeptidase	NO
AT2G23050	2.36688	3.04583	6.5427e-09	5.81437e-07	UP	Phototropic-responsive NPH3 family protein	NAKED PINS IN YUC MUTANTS 4 (NPY4); FUNCTIONS IN: signal transducer activity; INVOLVED IN: response to light stimulus; EXPRESSED IN: 6 plant structures; EXPRESSED DURING: D bilateral stage; CONTAINS InterPro DOMAIN/s: NPH3 (InterPro:IPR004249), BTB/POZ (InterPro:IPR013069), BTB/POZ fold (InterPro:IPR011333), BTB/POZ-like (InterPro:IPR000210); BEST Arabidopsis thaliana protein match is: Phototropi…	BTB/POZ | BTB/POZ fold | BTB/POZ-like | NPH3 domain	NO
AT2G23100	-2.71015	0.683601	1.08332e-06	5.47036e-05	DOWN	Cysteine/Histidine-rich C1 domain family protein	Cysteine/Histidine-rich C1 domain family protein; FUNCTIONS IN: zinc ion binding; LOCATED IN: chloroplast; CONTAINS InterPro DOMAIN/s: Zinc finger, PHD-type (InterPro:IPR001965), DC1 (InterPro:IPR004146), C1-like (InterPro:IPR011424); BEST Arabidopsis thaliana protein match is: Cysteine/Histidine-rich C1 domain family protein (TAIR:AT5G42280.1)	C1-like | DC1 | Zinc finger, PHD-type | Zinc finger, RING/FYVE/PHD-type	NO
AT2G23360	0.75109	4.42474	0.0021504	0.0306897	UP	Plant protein of unknown function (DUF869)	Plant protein of unknown function (DUF869); CONTAINS InterPro DOMAIN/s: Protein of unknown function DUF869, plant (InterPro:IPR008587); BEST Arabidopsis thaliana protein match is: Plant protein of unknown function (DUF869) (TAIR:AT1G19835.2)	Filament-like plant protein	NO
[truncated: 1,848 more rows]

## Sheet: miRNAs
Gene ID	logFC	logCPM	PValue	FDR	Direction of change	description	Direction of miRNA accumulation	verification by northern
AT4G13493	-1.06242	3.16071	0.00172516	0.0254881	DOWN	MIR850a; miRNA	Declease
AT1G11735	1.30818	1.35797	0.000676276	0.0120009	UP	MIR171B; miRNA	Declease
AT4G24415	1.31134	2.4088	0.000112128	0.00274462	UP	MIR824a; miRNA	Declease
AT1G31173	1.45218	4.13994	1.55063e-06	7.45032e-05	UP	MIR167D; miRNA	Declease	Yes
AT2G39175	1.72591	2.44034	7.46933e-07	3.97432e-05	UP	MIR160/MIR160A; miRNA	Inclease
[truncated: 48 more rows]

## Sheet: GO_up_C
Term Name	GOID	Term Type	Depth	cnt(reference)	cnt(cbp80_up)	fsh(cbp80_up)
[truncated: 24 more rows]

[truncated: 5 more sheets: GO_up_F, GO_up_P, GO_down_C, GO_down_F, GO_down_P]
